# Supplementary material for: AI is a viable alternative to high throughput screening: a 318-target study
Source: PubMed Central journal article supplement (PMC10987645; doi:10.1038/s41598-024-54655-z), 2024-04-02
Supplement: 41598_2024_54655_MOESM2_ESM.pdf [file 41598_2024_54655_MOESM2_ESM.pdf]

# AI is a Viable Alternative to High Throughput Screening: A 318-target study

The Atomwise AIMS Program<sup>\*</sup>, Izhar Wallach<sup>1</sup><sup>‡</sup>

<sup>\*</sup> Lists of participants and their affiliations appear in the manuscript. <sup>1</sup>Atomwise Inc.

<sup>‡</sup>corresponding author: [izhar@atomwise.com](mailto:izhar@atomwise.com)

## Supplementary Material

# Internal Portfolio Validation

## LATS1

Large tumor suppressor homolog 1 (LATS1) is a negative regulator of YAP1 in the Hippo signaling pathway<sup>1</sup>. YAP1 degradation by Hippo pathway kinases, such as LATS1, is pivotal in organ size control and tumor suppression through restricting proliferation and promoting apoptosis<sup>2</sup>. There are numerous indications associating LATS1 with tumor immunogenicity. LATS1 deletion in tumors leads to tumor destruction by enhancing anti-tumor immune responses. Inactivation of the “tumor suppressor” LATS1/2 in tumor cells strongly suppresses tumor growth in immune-competent, but not immune-compromised, mice due to the induction of host anti-tumor immune responses<sup>3</sup>. ATP-competitive inhibitors of LATS kinases cause Yap-dependent proliferation of murine supporting cells in the inner ear, murine cardiomyocytes, and human Muller glia in retinal organoids<sup>4</sup>.

Computationally targeting of the LATS1 ATP binding site posed a significant challenge because neither a 3-dimensional structure of the receptor nor any bioactivity binding data were available to us. We used SWISS-MODEL<sup>5,6</sup> to build a homology model of the receptor based on a homologous x-ray crystal structure sharing 42% sequence identity and a resolution of 3.15Å (PDB: 5NCL). We used the screening protocol described above to select a set of 418 diverse scaffolds, all dissimilar to any known kinase inhibitor in our training corpus.

We describe the assay protocol in the Methods section. We tested the 418 scaffolds in a KinomeScan competitive binding assay and identified 76 compounds that reduced positive control binding to <50% at 30uM. Subsequently, 75 of these showed dose-responsive binding behavior with  $K_D$ 's ranging from 0.077 - 82  $\mu$ M (Supplementary Table 8 and Supplementary Table 9). We then chose 8 scaffolds for hit expansion and validation, performing analog expansion as described before, and selected a total of 834 analogs of these scaffolds. These compounds were tested in the KinaseProfiler activity assay. 435 analogs showed >50% inhibition at 50uM, out of which 382 demonstrated DR behavior with IC50s ranging from 0.034 - 76  $\mu$ M (Supplementary Table 10). In all 8 analog expansions, we achieved sub- $\mu$ M potencies and malleable structure-activity relationships (SAR) across the series (Supplementary Table 11) as well as improved potencies over the parent hit (Supplementary Figure 4).

## VCP

Valosin-containing protein (VCP) is an AAA-type ATPase that governs diverse cellular processes, from the degradation of damaged proteins and organelles to key signaling events and chromatin regulation with thousands of client proteins<sup>7</sup>. VCP is a regulator in the ubiquitin-proteasome system, extracting misfolded proteins and chaperoning them to the proteasome for degradation. Elevated ATPase activity of VCP has been implicated in various neurological and oncological indications, such as inclusion body myopathy with early-onset Paget disease of bone and/or frontotemporal dementia (IBMPFD), amyotrophic lateral sclerosis, melanomas, non-small cell lung carcinoma, and breast cancer<sup>8-12</sup>.

In this study, we sought to discover small-molecule inhibitors of VCP<sup>R155H</sup> mutant responsible for IBMPFD, a rare autosomal dominant disorder. We used the AtomNet model to screen 16B Enamine REAL compounds against a relatively low-resolution crystal structure of VCP (PDB: 6MCK, 3.8Å). We chose a screening site that encompassed both the orthosteric ADP binding site<sup>10,13-15</sup> in the D2 domain and a nearby allosteric site<sup>13,16</sup> (Supplementary Fig. 5). Using the protocol described in the Methods section, we selected a set of 416 scaffolds for testing in VCP<sup>R155H</sup> ADP-Glo bioluminescence assay<sup>17,18</sup>. Of the 20 scaffolds showing >40% inhibition at 50uM, 19 exhibited dose-responsive behavior, with IC50s ranging from 2.4µM to 99.7uM. ADP competition studies of the top 15 hits yielded 3 competitive, 1 uncompetitive, and 11 non-competitive scaffolds. We advanced 7 scaffolds (3 competitive, 1 uncompetitive, and 3 noncompetitive) to hit expansion based on their potency and the mechanism of action, that is, whether the compound competes with ADP for the binding site (Supplementary Table 12 and Supplementary Table 9). All of our compounds including the allosteric scaffolds were novel, having a maximal similarity of 0.47 (Tanimoto, ECFP4) to published VCP inhibitors.

## Assay Protocols

See Supplementary file Assay\_details.xlsx

# Figures

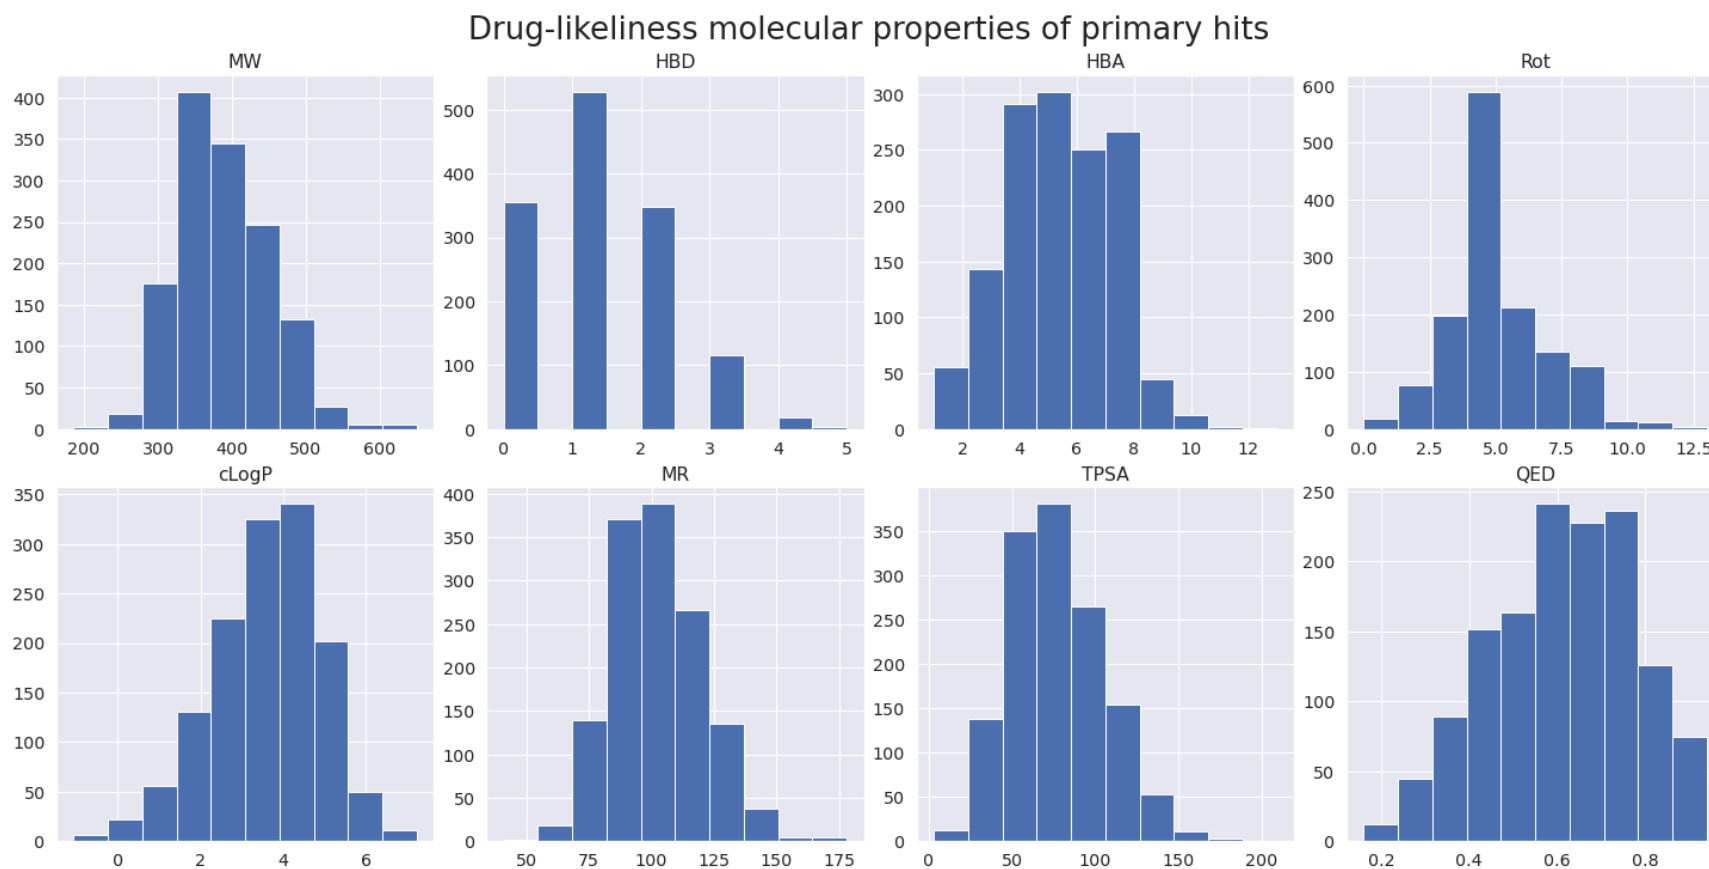

**Supplementary Fig. 1.** An illustration of the distributions of drug-like properties of the primary hits identified in the 296 AIMS projects. The molecular properties show that the compounds largely obey Lipinski rules and are amenable for further development. The number of hydrogen bond donors (HBD), number of hydrogen bond acceptors (HBA), number of rotational bonds, calculated logP (cLogP), molecular refractivity (MR), topological polar surface area (TPSA), and quantitative estimation of drug-likeness (QED<sup>19</sup>), were calculated using RDkit<sup>20</sup>.



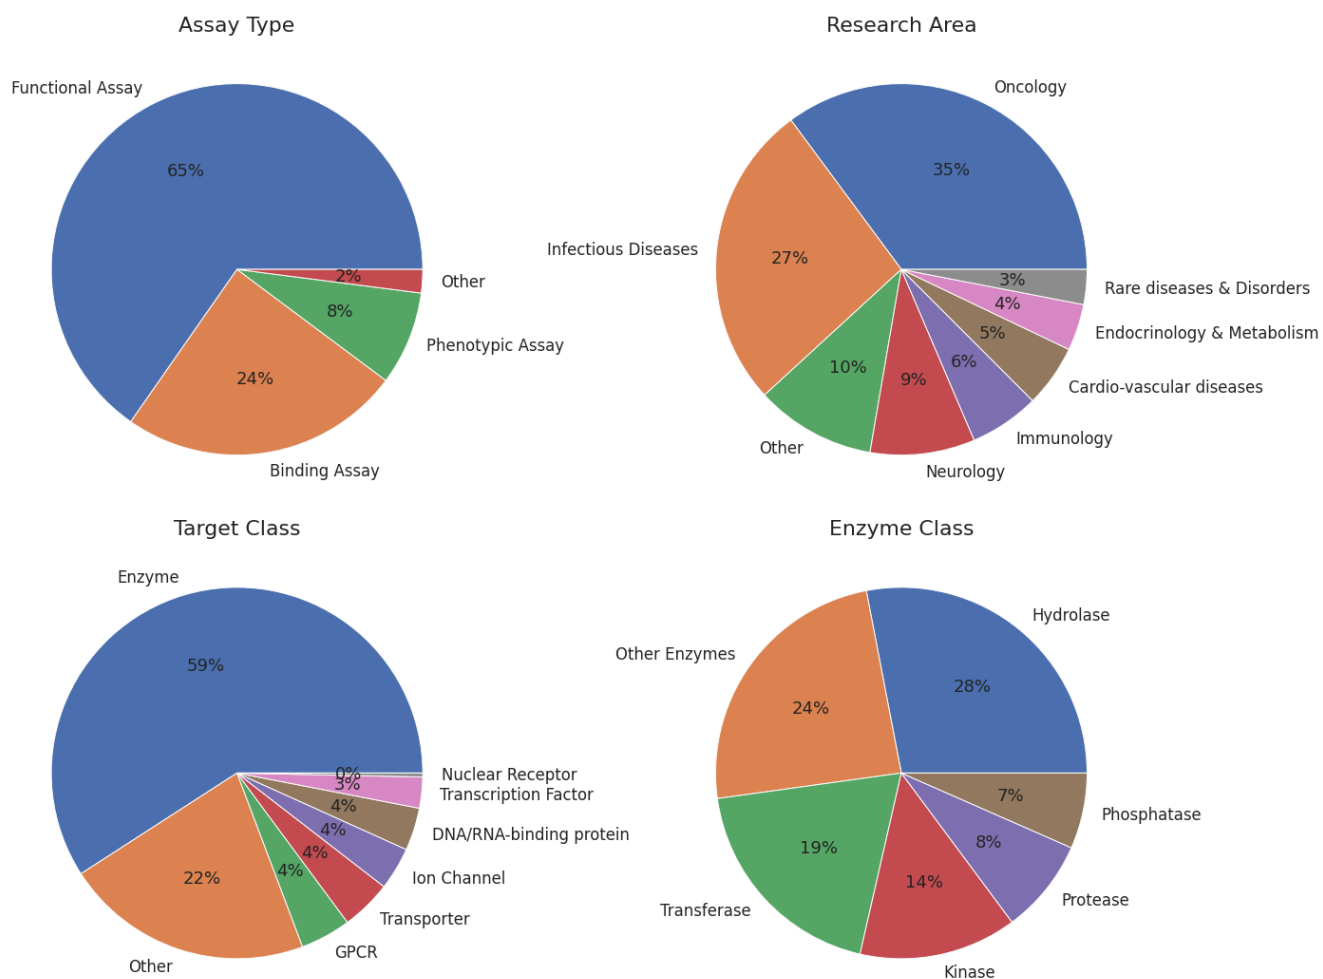

**Supplementary Fig. 2.** The distributions of 49 dose-response validation projects across assay types used in the primary screen, research area, target class, and further breakdown to enzyme class when applicable. The similarities of these distributions to that of the AIMS projects suggest that the DR validation set well represents the over set of AIMS projects.

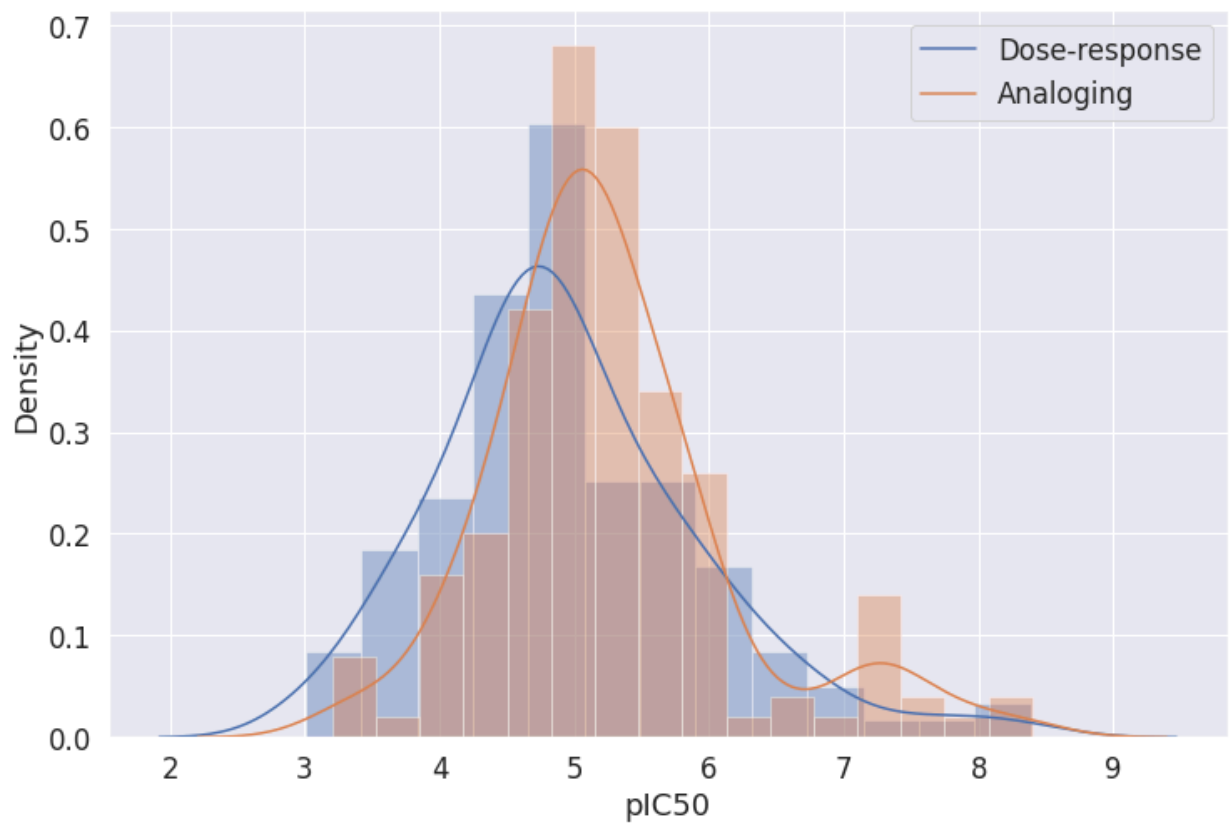

**Supplementary Fig. 3.** The distribution of potencies obtained in the dose-response and the analoging validation studies. As expected, the potencies tend to increase due to the exploration of analog space around the active scaffolds. The median DR activity of the 144 validated analogs was 7.4 $\mu$ M compared to the median of 15.4 $\mu$ M of the parent compound.

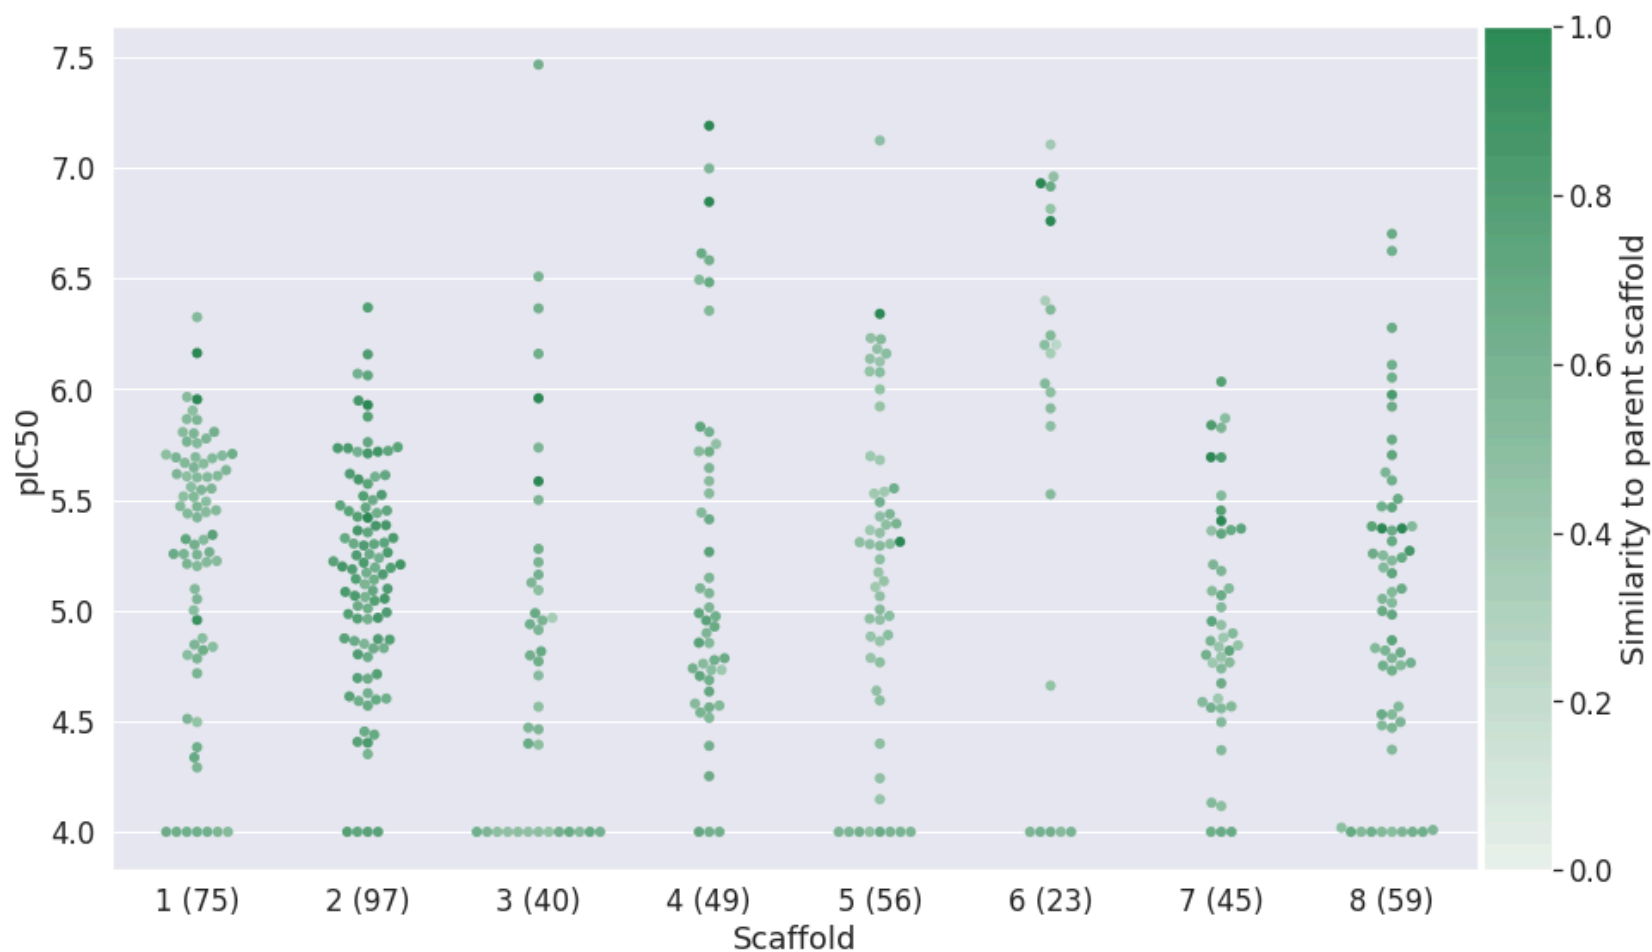

**Supplementary Fig. 4.** An illustration of the distribution of potencies for each of the analog sets selected for 8 LATS1 scaffolds identified in the first round of testing. In all 8 expansions, we achieved sub- $\mu$ M potencies and malleable structure-activity relation (SAR). The color of the data points indicates the similarity of the analogs to their parent scaffold (Tanimoto similarity, ECFP4). The number of analogs of each scaffold is given in parentheses, e.g. there were 75 analogs of Scaffold 1.

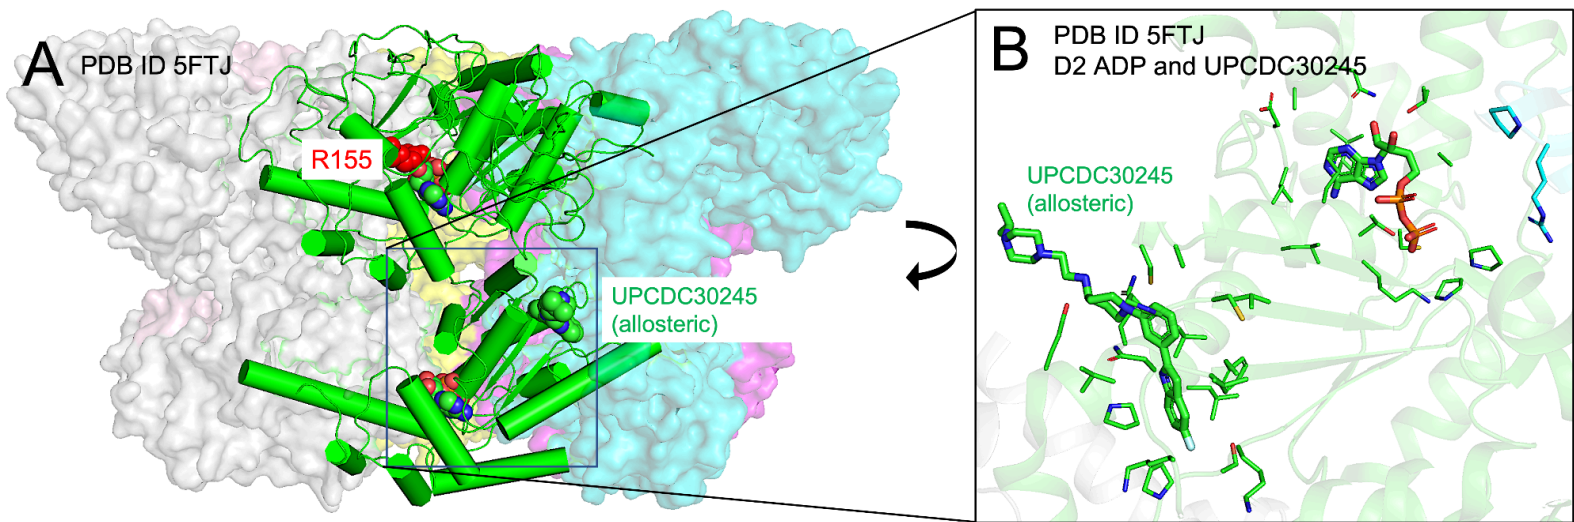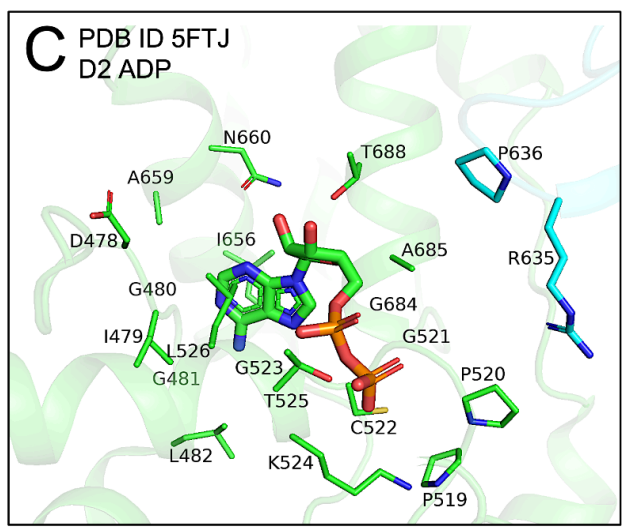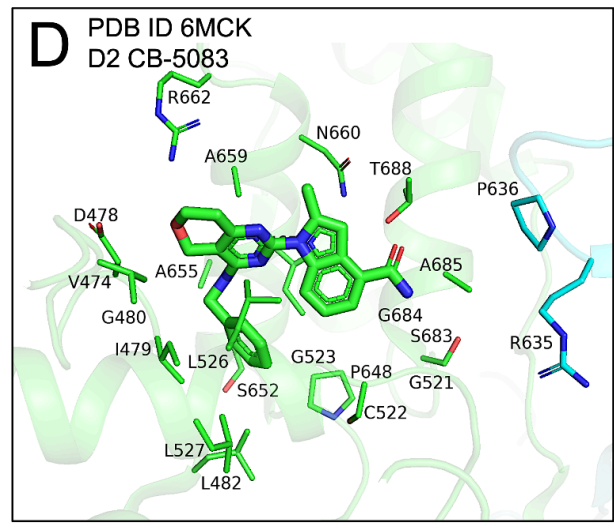

**Supplementary Fig. 5.** Illustration of the binding site of VCP used in the virtual screening. (A) The side view of VCP hexamer including N-terminal (residues 2-187), D1 (residues 209-462), and D2 (481-763) domains from PDB ID 5FTJ. The site of R155H mutation responsible for IBMPFD is adjacent to the D1 ADP site and is highlighted in red spheres on panel A. Each protomer of the hexamer is represented with a different color. D2 ADP and UPCDC30245 allosteric ligand-binding sites as well as a separate close-up view of D2 ADP site are displayed on (B) and (C), respectively. (D) The specific structure of the site used in the virtual screening is available via PDB ID 6MCK with bound CB-5083, an ADP-competitive inhibitor of VCP binding to D2 ADP site.

## Tables

| Target<br>(Uniprot ID)           | Identified hit                                                                      | Potency<br>( $\mu\text{M}$ ) | Nearest Neighbor<br>(NN) | NN<br>Similarity<br>(ECFP4,<br>Tanimoto) | NN<br>potency<br>( $\mu\text{M}$ ) |
|----------------------------------|-------------------------------------------------------------------------------------|------------------------------|--------------------------|------------------------------------------|------------------------------------|
| Miro1 <sup>21</sup><br>(Q8IXI2)  | 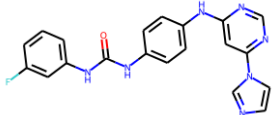  | 7.8                          | NA                       | NA                                       | NA                                 |
| pCD163 <sup>22</sup><br>(Q2VL90) |  | 7.5                          | NA                       | NA                                       | NA                                 |

|                                                                |                                                                                     |       |                                                                                       |      |      |
|----------------------------------------------------------------|-------------------------------------------------------------------------------------|-------|---------------------------------------------------------------------------------------|------|------|
| TAAR5 <sup>23</sup><br>(Q5QD14)                                | 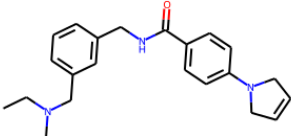   | 1.1   |    | 0.27 | 5    |
| SHIP1 <sup>24</sup><br>(Q92835)                                |    | 0.2   |    | 0.15 | NA   |
| SPOP and<br>OTUD7A <sup>25</sup><br>(Q8TE49)                   |    | 1.1   | NA                                                                                    | NA   | NA   |
| Aspartate<br>N-acetyltransf<br>erase <sup>26</sup><br>(Q8N9F0) |    | 0.40  |   | 0.16 | 0.6  |
| LATS1<br>(O95835)                                              |  | 0.077 |  | 0.23 | 10   |
| VCP R155H<br>(P55072)                                          |  | 11.3  |  | 0.16 | 0.23 |

|                                  |                                                                                     |      |                                                                                       |      |        |
|----------------------------------|-------------------------------------------------------------------------------------|------|---------------------------------------------------------------------------------------|------|--------|
| COB, CAWG<br>(P0C8L0,<br>C4YQJ6) | 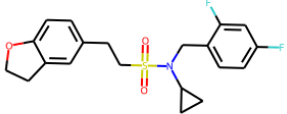   | 2.5  | NA                                                                                    | NA   | NA     |
| DXR<br>(O96693)                  |    | 1.67 | NA                                                                                    | NA   | NA     |
| RRM2<br>(P31350)                 |    | 5    |    | 0.21 | 33.884 |
| VP1<br>(Q9YLJ3)                  |    | 1.7  | NA                                                                                    | NA   | NA     |
| DNMT1<br>(P26358)                |   | 34.6 |   | 0.21 | 7.586  |
| CREBBP<br>(Q92793)               |  | 6    |  | 0.20 | 37.91  |

|                                    |                                                                                   |     |                                                                                     |      |       |
|------------------------------------|-----------------------------------------------------------------------------------|-----|-------------------------------------------------------------------------------------|------|-------|
| KRIT1/ HEG1<br>(O00522/<br>Q9ULI3) | 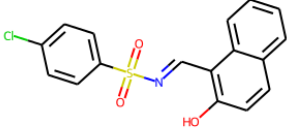 | 21  | NA                                                                                  | NA   | NA    |
| EPHX2<br>(P34913)                  |  | 3.3 |  | 0.31 | 0.095 |

**Supplementary Table 1.** Examples of bioactive compounds discovered using the AtomNet screening system. Compounds for Miro1, pCD163, TAAR5, SHIP1, SPOP and OTUD7A, and Aspartate N-acetyltransferase were previously published. For each compound, we provide the Nearest Neighbor (NN) compound in the training data as defined by Tanimoto distance over ECFP4 fingerprints, and the corresponding annotated potency against the target of interest. “NA” denotes that the target lacked any active molecules in our training data or was labeled as active but without quantitative dose response potency.



| Target | Structure                                                                          | IC50 (μM) | Hill Slope | R <sup>2</sup> | Dose-response curve                                                                  |
|--------|------------------------------------------------------------------------------------|-----------|------------|----------------|--------------------------------------------------------------------------------------|
| ASAH1  | 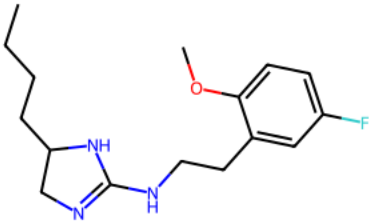  | 16.60     | 1.06       | 0.94           |   |
| AXL    |  | 4.73      | 1.16       | 0.92           |  |

|       |                                                                                   |       |      |      |                                                                                      |
|-------|-----------------------------------------------------------------------------------|-------|------|------|--------------------------------------------------------------------------------------|
| CDK5  | 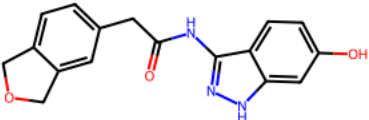 | 0.61  | 1.13 | 0.99 |   |
| GFPT1 |  | 38.50 | 2.17 | 0.97 |  |

| <p>KCNT1</p> | 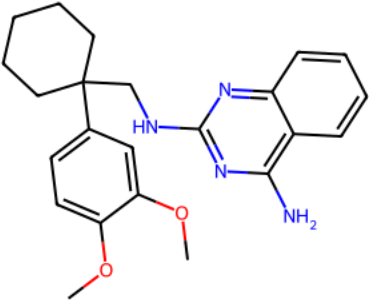 | <p>1.50</p>  | <p>1.49</p> | <p>0.87</p> |  <table border="1"> <caption>Approximate data points for KCNT1</caption> <thead> <tr> <th>log[M]</th> <th>% inhibition</th> </tr> </thead> <tbody> <tr><td>-7.0</td><td>10</td></tr> <tr><td>-6.5</td><td>15</td></tr> <tr><td>-6.0</td><td>40</td></tr> <tr><td>-5.5</td><td>75</td></tr> <tr><td>-5.0</td><td>95</td></tr> <tr><td>-4.5</td><td>98</td></tr> </tbody> </table>                                                                  | log[M] | % inhibition | -7.0 | 10 | -6.5 | 15 | -6.0 | 40 | -5.5 | 75 | -5.0 | 95 | -4.5 | 98 |      |    |      |     |
|--------------|-----------------------------------------------------------------------------------|--------------|-------------|-------------|--------------------------------------------------------------------------------------------------------------------------------------------------------------------------------------------------------------------------------------------------------------------------------------------------------------------------------------------------------------------------------------------------------------------------------------------------------------------------------------------------------------------------------------|--------|--------------|------|----|------|----|------|----|------|----|------|----|------|----|------|----|------|-----|
| log[M]       | % inhibition                                                                      |              |             |             |                                                                                                                                                                                                                                                                                                                                                                                                                                                                                                                                      |        |              |      |    |      |    |      |    |      |    |      |    |      |    |      |    |      |     |
| -7.0         | 10                                                                                |              |             |             |                                                                                                                                                                                                                                                                                                                                                                                                                                                                                                                                      |        |              |      |    |      |    |      |    |      |    |      |    |      |    |      |    |      |     |
| -6.5         | 15                                                                                |              |             |             |                                                                                                                                                                                                                                                                                                                                                                                                                                                                                                                                      |        |              |      |    |      |    |      |    |      |    |      |    |      |    |      |    |      |     |
| -6.0         | 40                                                                                |              |             |             |                                                                                                                                                                                                                                                                                                                                                                                                                                                                                                                                      |        |              |      |    |      |    |      |    |      |    |      |    |      |    |      |    |      |     |
| -5.5         | 75                                                                                |              |             |             |                                                                                                                                                                                                                                                                                                                                                                                                                                                                                                                                      |        |              |      |    |      |    |      |    |      |    |      |    |      |    |      |    |      |     |
| -5.0         | 95                                                                                |              |             |             |                                                                                                                                                                                                                                                                                                                                                                                                                                                                                                                                      |        |              |      |    |      |    |      |    |      |    |      |    |      |    |      |    |      |     |
| -4.5         | 98                                                                                |              |             |             |                                                                                                                                                                                                                                                                                                                                                                                                                                                                                                                                      |        |              |      |    |      |    |      |    |      |    |      |    |      |    |      |    |      |     |
| <p>KDM6A</p> |  | <p>46.20</p> | <p>1.90</p> | <p>0.98</p> |  <table border="1"> <caption>Approximate data points for KDM6A</caption> <thead> <tr> <th>log[M]</th> <th>% inhibition</th> </tr> </thead> <tbody> <tr><td>-7.0</td><td>0</td></tr> <tr><td>-6.5</td><td>0</td></tr> <tr><td>-6.0</td><td>0</td></tr> <tr><td>-5.5</td><td>0</td></tr> <tr><td>-5.0</td><td>5</td></tr> <tr><td>-4.5</td><td>35</td></tr> <tr><td>-4.2</td><td>75</td></tr> <tr><td>-4.0</td><td>100</td></tr> </tbody> </table> | log[M] | % inhibition | -7.0 | 0  | -6.5 | 0  | -6.0 | 0  | -5.5 | 0  | -5.0 | 5  | -4.5 | 35 | -4.2 | 75 | -4.0 | 100 |
| log[M]       | % inhibition                                                                      |              |             |             |                                                                                                                                                                                                                                                                                                                                                                                                                                                                                                                                      |        |              |      |    |      |    |      |    |      |    |      |    |      |    |      |    |      |     |
| -7.0         | 0                                                                                 |              |             |             |                                                                                                                                                                                                                                                                                                                                                                                                                                                                                                                                      |        |              |      |    |      |    |      |    |      |    |      |    |      |    |      |    |      |     |
| -6.5         | 0                                                                                 |              |             |             |                                                                                                                                                                                                                                                                                                                                                                                                                                                                                                                                      |        |              |      |    |      |    |      |    |      |    |      |    |      |    |      |    |      |     |
| -6.0         | 0                                                                                 |              |             |             |                                                                                                                                                                                                                                                                                                                                                                                                                                                                                                                                      |        |              |      |    |      |    |      |    |      |    |      |    |      |    |      |    |      |     |
| -5.5         | 0                                                                                 |              |             |             |                                                                                                                                                                                                                                                                                                                                                                                                                                                                                                                                      |        |              |      |    |      |    |      |    |      |    |      |    |      |    |      |    |      |     |
| -5.0         | 5                                                                                 |              |             |             |                                                                                                                                                                                                                                                                                                                                                                                                                                                                                                                                      |        |              |      |    |      |    |      |    |      |    |      |    |      |    |      |    |      |     |
| -4.5         | 35                                                                                |              |             |             |                                                                                                                                                                                                                                                                                                                                                                                                                                                                                                                                      |        |              |      |    |      |    |      |    |      |    |      |    |      |    |      |    |      |     |
| -4.2         | 75                                                                                |              |             |             |                                                                                                                                                                                                                                                                                                                                                                                                                                                                                                                                      |        |              |      |    |      |    |      |    |      |    |      |    |      |    |      |    |      |     |
| -4.0         | 100                                                                               |              |             |             |                                                                                                                                                                                                                                                                                                                                                                                                                                                                                                                                      |        |              |      |    |      |    |      |    |      |    |      |    |      |    |      |    |      |     |

|      |                                                                                   |       |      |      |                                                                                      |
|------|-----------------------------------------------------------------------------------|-------|------|------|--------------------------------------------------------------------------------------|
| MC2R | 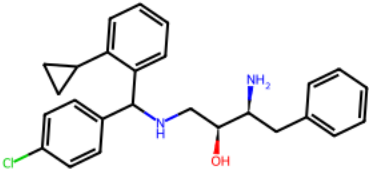 | 27.30 | 3.77 | 0.98 |   |
| NT5E |  | 28.40 | 0.91 | 0.98 |  |

|        |                                                                                   |       |      |      |                                                                                      |
|--------|-----------------------------------------------------------------------------------|-------|------|------|--------------------------------------------------------------------------------------|
| PARP14 | 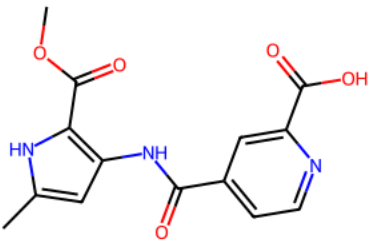 | 3.82  | 0.95 | 0.94 |   |
| POLQ   |  | 14.50 | 3.64 | 1.00 |  |

| PPARA  | 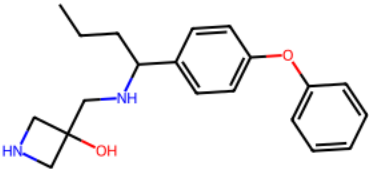 | 23.90 | 1.94 | 0.81 |  <table border="1"> <caption>Approximate data points for PPARA</caption> <thead> <tr> <th>log[M]</th> <th>% inhibition</th> </tr> </thead> <tbody> <tr><td>-8</td><td>0</td></tr> <tr><td>-7.5</td><td>0</td></tr> <tr><td>-7</td><td>5</td></tr> <tr><td>-6.5</td><td>0</td></tr> <tr><td>-6</td><td>0</td></tr> <tr><td>-5.5</td><td>0</td></tr> <tr><td>-5</td><td>10</td></tr> <tr><td>-4.5</td><td>35</td></tr> <tr><td>-4</td><td>55</td></tr> </tbody> </table>    | log[M] | % inhibition | -8 | 0 | -7.5 | 0 | -7 | 5 | -6.5 | 0 | -6 | 0 | -5.5 | 0  | -5 | 10 | -4.5 | 35 | -4 | 55  |
|--------|-----------------------------------------------------------------------------------|-------|------|------|--------------------------------------------------------------------------------------------------------------------------------------------------------------------------------------------------------------------------------------------------------------------------------------------------------------------------------------------------------------------------------------------------------------------------------------------------------------------------------------------------------------------------------------------------------------|--------|--------------|----|---|------|---|----|---|------|---|----|---|------|----|----|----|------|----|----|-----|
| log[M] | % inhibition                                                                      |       |      |      |                                                                                                                                                                                                                                                                                                                                                                                                                                                                                                                                                              |        |              |    |   |      |   |    |   |      |   |    |   |      |    |    |    |      |    |    |     |
| -8     | 0                                                                                 |       |      |      |                                                                                                                                                                                                                                                                                                                                                                                                                                                                                                                                                              |        |              |    |   |      |   |    |   |      |   |    |   |      |    |    |    |      |    |    |     |
| -7.5   | 0                                                                                 |       |      |      |                                                                                                                                                                                                                                                                                                                                                                                                                                                                                                                                                              |        |              |    |   |      |   |    |   |      |   |    |   |      |    |    |    |      |    |    |     |
| -7     | 5                                                                                 |       |      |      |                                                                                                                                                                                                                                                                                                                                                                                                                                                                                                                                                              |        |              |    |   |      |   |    |   |      |   |    |   |      |    |    |    |      |    |    |     |
| -6.5   | 0                                                                                 |       |      |      |                                                                                                                                                                                                                                                                                                                                                                                                                                                                                                                                                              |        |              |    |   |      |   |    |   |      |   |    |   |      |    |    |    |      |    |    |     |
| -6     | 0                                                                                 |       |      |      |                                                                                                                                                                                                                                                                                                                                                                                                                                                                                                                                                              |        |              |    |   |      |   |    |   |      |   |    |   |      |    |    |    |      |    |    |     |
| -5.5   | 0                                                                                 |       |      |      |                                                                                                                                                                                                                                                                                                                                                                                                                                                                                                                                                              |        |              |    |   |      |   |    |   |      |   |    |   |      |    |    |    |      |    |    |     |
| -5     | 10                                                                                |       |      |      |                                                                                                                                                                                                                                                                                                                                                                                                                                                                                                                                                              |        |              |    |   |      |   |    |   |      |   |    |   |      |    |    |    |      |    |    |     |
| -4.5   | 35                                                                                |       |      |      |                                                                                                                                                                                                                                                                                                                                                                                                                                                                                                                                                              |        |              |    |   |      |   |    |   |      |   |    |   |      |    |    |    |      |    |    |     |
| -4     | 55                                                                                |       |      |      |                                                                                                                                                                                                                                                                                                                                                                                                                                                                                                                                                              |        |              |    |   |      |   |    |   |      |   |    |   |      |    |    |    |      |    |    |     |
| PPM1D  |  | 4.33  | 1.01 | 0.98 |  <table border="1"> <caption>Approximate data points for PPM1D</caption> <thead> <tr> <th>log[M]</th> <th>% inhibition</th> </tr> </thead> <tbody> <tr><td>-8</td><td>0</td></tr> <tr><td>-7.5</td><td>0</td></tr> <tr><td>-7</td><td>0</td></tr> <tr><td>-6.5</td><td>0</td></tr> <tr><td>-6</td><td>5</td></tr> <tr><td>-5.5</td><td>25</td></tr> <tr><td>-5</td><td>75</td></tr> <tr><td>-4.5</td><td>95</td></tr> <tr><td>-4</td><td>100</td></tr> </tbody> </table> | log[M] | % inhibition | -8 | 0 | -7.5 | 0 | -7 | 0 | -6.5 | 0 | -6 | 5 | -5.5 | 25 | -5 | 75 | -4.5 | 95 | -4 | 100 |
| log[M] | % inhibition                                                                      |       |      |      |                                                                                                                                                                                                                                                                                                                                                                                                                                                                                                                                                              |        |              |    |   |      |   |    |   |      |   |    |   |      |    |    |    |      |    |    |     |
| -8     | 0                                                                                 |       |      |      |                                                                                                                                                                                                                                                                                                                                                                                                                                                                                                                                                              |        |              |    |   |      |   |    |   |      |   |    |   |      |    |    |    |      |    |    |     |
| -7.5   | 0                                                                                 |       |      |      |                                                                                                                                                                                                                                                                                                                                                                                                                                                                                                                                                              |        |              |    |   |      |   |    |   |      |   |    |   |      |    |    |    |      |    |    |     |
| -7     | 0                                                                                 |       |      |      |                                                                                                                                                                                                                                                                                                                                                                                                                                                                                                                                                              |        |              |    |   |      |   |    |   |      |   |    |   |      |    |    |    |      |    |    |     |
| -6.5   | 0                                                                                 |       |      |      |                                                                                                                                                                                                                                                                                                                                                                                                                                                                                                                                                              |        |              |    |   |      |   |    |   |      |   |    |   |      |    |    |    |      |    |    |     |
| -6     | 5                                                                                 |       |      |      |                                                                                                                                                                                                                                                                                                                                                                                                                                                                                                                                                              |        |              |    |   |      |   |    |   |      |   |    |   |      |    |    |    |      |    |    |     |
| -5.5   | 25                                                                                |       |      |      |                                                                                                                                                                                                                                                                                                                                                                                                                                                                                                                                                              |        |              |    |   |      |   |    |   |      |   |    |   |      |    |    |    |      |    |    |     |
| -5     | 75                                                                                |       |      |      |                                                                                                                                                                                                                                                                                                                                                                                                                                                                                                                                                              |        |              |    |   |      |   |    |   |      |   |    |   |      |    |    |    |      |    |    |     |
| -4.5   | 95                                                                                |       |      |      |                                                                                                                                                                                                                                                                                                                                                                                                                                                                                                                                                              |        |              |    |   |      |   |    |   |      |   |    |   |      |    |    |    |      |    |    |     |
| -4     | 100                                                                               |       |      |      |                                                                                                                                                                                                                                                                                                                                                                                                                                                                                                                                                              |        |              |    |   |      |   |    |   |      |   |    |   |      |    |    |    |      |    |    |     |

|        |                                                                                   |       |      |      |                                                                                      |
|--------|-----------------------------------------------------------------------------------|-------|------|------|--------------------------------------------------------------------------------------|
| PRMT5  | 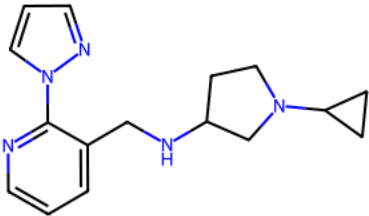 | 32.30 | 1.71 | 0.94 |   |
| PRODH2 |  | 26.30 | 0.78 | 0.98 |  |

**Supplementary Table 2.** Dose-response curves of representative bioactive compounds reported in the Internal Portfolio Validation section. Curve plots, hill slopes,  $R^2$ , and IC50 or Kd values were generated using Prism<sup>1</sup>.

<sup>1</sup> GraphPad Software, San Diego, California USA, [www.graphpad.com](http://www.graphpad.com)

| Project Number | UniProt ID        | # Compounds Tested | No. Hits | Hit rate (%) | Assay Type | Model Type | Target Class | Enzyme Class  | Research Area              |
|----------------|-------------------|--------------------|----------|--------------|------------|------------|--------------|---------------|----------------------------|
| 001            | Q9NZQ7            | 82                 | 4        | 4.88         | Binding    | X-ray      | Other        | -             | Oncology                   |
| 002            | Q9UBT2,<br>Q9UBE0 | 73                 | 2        | 2.74         | Binding    | X-ray      | Enzyme       | Other Enzymes | Oncology                   |
| 003            | Q9HBX9            | 141                | 37       | 26.2         | Functional | Homology   | GPCR         | -             | Other                      |
| 004            | Q96KS0            | 72                 | 3        | 4.17         | Phenotypic | Homology   | Enzyme       | Other Enzymes | Oncology                   |
| 005            | Q2VL90            | 90                 | 1        | 1.11         | Functional | X-ray      | Other        | -             | Other                      |
| 006            | Q8IXL6            | 72                 | 0        | 0.0          | Functional | Homology   | Enzyme       | Kinase        | Oncology                   |
| 007            | Q8I5R7            | 74                 | 8        | 10.8         | Functional | X-ray      | Enzyme       | Other Enzymes | Infectious Diseases        |
| 008            | P35749            | 72                 | 9        | 12.5         | Functional | Homology   | Other        | -             | Endocrinology & Metabolism |
| 009            | Q9Y2P5            | 77                 | 0        | 0.0          | Functional | Homology   | Enzyme       | Other Enzymes | Endocrinology & Metabolism |
| 010            | P28827            | 76                 | 12       | 15.8         | Phenotypic | Homology   | Other        | Phosphatase   | Oncology                   |
| 011            | O75533            | 69                 | 0        | 0.0          | Phenotypic | X-ray      | Other        | -             | Oncology                   |
| 012            | Q8NFI3            | 72                 | 0        | 0.0          | Functional | Homology   | Enzyme       | Hydrolase     | Rare diseases & Disorders  |
| 013            | Q12931            | 73                 | 0        | 0.0          | Binding    | X-ray      | Enzyme       | Hydrolase     | Oncology                   |
| 014            | Q14508            | 72                 | 1        | 1.39         | Phenotypic | Homology   | Other        | -             | Oncology                   |



|     |        |    |    |      |            |          |                      |             |                            |
|-----|--------|----|----|------|------------|----------|----------------------|-------------|----------------------------|
| 015 | Q13886 | 77 | 0  | 0.0  | Phenotypic | Homology | Transcription Factor | -           | Neurology                  |
| 016 | Q9UL51 | 55 | 3  | 5.45 | Phenotypic | X-ray    | Ion Channel          | -           | Other                      |
| 017 | Q92743 | 83 | 6  | 7.23 | Binding    | X-ray    | Enzyme               | Protease    | Other                      |
| 018 | P14625 | 72 | 0  | 0.0  | Binding    | X-ray    | Enzyme               | Hydrolase   | Oncology                   |
| 019 | Q9NVD7 | 76 | 15 | 19.7 | Phenotypic | X-ray    | Other                | -           | Cardio-vascular diseases   |
| 020 | Q8NBL1 | 75 | 1  | 1.33 | Functional | Homology | Enzyme               | Transferase | Other                      |
| 021 | Q12852 | 73 | 0  | 0.0  | Phenotypic | X-ray    | Enzyme               | Kinase      | Other                      |
| 022 | Q9Y623 | 88 | 4  | 4.55 | Functional | Homology | Other                | -           | Endocrinology & Metabolism |
| 023 | Q8TE49 | 73 | 2  | 2.74 | Phenotypic | Homology | Enzyme               | Hydrolase   | Other                      |
| 024 | Q8WZ42 | 76 | 7  | 9.21 | Binding    | X-ray    | Enzyme               | Kinase      | Other                      |
| 025 | P9WJJ5 | 76 | 6  | 7.89 | Functional | X-ray    | Enzyme               | Transferase | Infectious Diseases        |
| 026 | Q92835 | 76 | 14 | 18.4 | Functional | Homology | Enzyme               | Phosphatase | Immunology                 |
| 027 | P07900 | 73 | 0  | 0.0  | Binding    | X-ray    | Enzyme               | Hydrolase   | Oncology                   |
| 028 | P28827 | 72 | 14 | 19.4 | Functional | X-ray    | Enzyme               | Phosphatase | Oncology                   |
| 029 | P25779 | 78 | 5  | 6.41 | Other      | X-ray    | Enzyme               | Hydrolase   | Infectious Diseases        |
| 030 | P44046 | 77 | 0  | 0.0  | Functional | X-ray    | Enzyme               | Hydrolase   | Infectious Diseases        |
| 031 | P04156 | 81 | 0  | 0.0  | Binding    | Homology | Other                | -           | Rare diseases & Disorders  |

|     |        |     |    |      |            |          |             |               |                            |
|-----|--------|-----|----|------|------------|----------|-------------|---------------|----------------------------|
| 032 | Q8IXI2 | 80  | 4  | 5.0  | Phenotypic | X-ray    | Enzyme      | Hydrolase     | Rare diseases & Disorders  |
| 033 | P32322 | 82  | 0  | 0.0  | Functional | X-ray    | Enzyme      | Other Enzymes | Oncology                   |
| 034 | C4YCM5 | 77  | 0  | 0.0  | Functional | X-ray    | Enzyme      | Kinase        | Infectious Diseases        |
| 035 | Q13936 | 76  | 2  | 2.63 | Binding    | Homology | Ion Channel | -             | Cardio-vascular diseases   |
| 036 | P49902 | 87  | 2  | 2.3  | Functional | X-ray    | Enzyme      | Hydrolase     | Oncology                   |
| 037 | Q4WUS9 | 71  | 2  | 2.82 | Functional | X-ray    | Enzyme      | Transferase   | Other                      |
| 038 | O60930 | 85  | 0  | 0.0  | Functional | X-ray    | Enzyme      | Hydrolase     | Oncology                   |
| 039 | Q9BRQ0 | 85  | 19 | 22.4 | Binding    | X-ray    | Other       | -             | Oncology                   |
| 040 | Q7PRZ8 | 64  | 3  | 4.69 | Functional | Homology | GPCR        | -             | Infectious Diseases        |
| 041 | Q13009 | 80  | 8  | 10.0 | Binding    | X-ray    | Other       | -             | Oncology                   |
| 042 | Q5TDH0 | 65  | 0  | 0.0  | Functional | X-ray    | Enzyme      | Protease      | Oncology                   |
| 043 | P09237 | 72  | 18 | 25.0 | Binding    | X-ray    | Enzyme      | Hydrolase     | Oncology                   |
| 044 | P28223 | 57  | 6  | 10.5 | Functional | Homology | GPCR        | -             | Infectious Diseases        |
| 045 | Q04IN8 | 62  | 4  | 6.45 | Other      | X-ray    | Other       | -             | Infectious Diseases        |
| 046 | P18031 | 130 | 13 | 10.0 | Functional | X-ray    | Enzyme      | Phosphatase   | Endocrinology & Metabolism |

|     |                   |     |    |      |            |          |                      |               |                            |
|-----|-------------------|-----|----|------|------------|----------|----------------------|---------------|----------------------------|
| 047 | Q7KWJ5            | 61  | 0  | 0.0  | Binding    | Homology | Transporter          | -             | Infectious Diseases        |
| 048 | P05546,<br>P00734 | 81  | 0  | 0.0  | Functional | X-ray    | Enzyme               | Protease      | Cardio-vascular diseases   |
| 049 | P50148            | 215 | 1  | 0.47 | Binding    | X-ray    | Other                | -             | Immunology                 |
| 050 | O00308            | 83  | 2  | 2.41 | Binding    | Homology | Enzyme               | Transferase   | Oncology                   |
| 051 | P28827            | 77  | 17 | 22.1 | Phenotypic | X-ray    | Enzyme               | Phosphatase   | Oncology                   |
| 052 | P12004            | 59  | 5  | 8.47 | Binding    | X-ray    | Other                | -             | Oncology                   |
| 053 | P55072            | 139 | 15 | 10.8 | Functional | X-ray    | Enzyme               | Hydrolase     | Other                      |
| 054 | Q5F7X0            | 155 | 0  | 0.0  | Functional | Homology | Enzyme               | Other Enzymes | Infectious Diseases        |
| 055 | Q05086            | 141 | 19 | 13.5 | Functional | X-ray    | Enzyme               | Transferase   | Oncology                   |
| 056 | Q66479            | 77  | 20 | 26.0 | Phenotypic | X-ray    | Enzyme               | Hydrolase     | Infectious Diseases        |
| 057 | O96693            | 76  | 11 | 14.5 | Phenotypic | X-ray    | Enzyme               | Other Enzymes | Infectious Diseases        |
| 058 | Q5HEB7            | 73  | 0  | 0.0  | Phenotypic | X-ray    | Enzyme               | Other Enzymes | Infectious Diseases        |
| 059 | Q16740            | 54  | 9  | 16.7 | Functional | X-ray    | Enzyme               | Hydrolase     | Endocrinology & Metabolism |
| 060 | O15178            | 57  | 6  | 10.5 | Binding    | X-ray    | Transcription Factor | -             | Oncology                   |
| 061 | Q9JJX6            | 73  | 6  | 8.22 | Other      | Homology | Ion Channel          | -             | Cardio-vascular diseases   |

|     |                   |    |   |      |            |          |             |               |                          |
|-----|-------------------|----|---|------|------------|----------|-------------|---------------|--------------------------|
| 062 | P31350            | 82 | 3 | 3.66 | Phenotypic | X-ray    | Enzyme      | Other Enzymes | Oncology                 |
| 063 | O95631            | 68 | 4 | 5.88 | Binding    | X-ray    | Other       | -             | Oncology                 |
| 064 | P9WHW5            | 57 | 0 | 0.0  | Functional | X-ray    | Enzyme      | Phosphatase   | Infectious Diseases      |
| 065 | P11021            | 79 | 0 | 0.0  | Functional | X-ray    | Enzyme      | Hydrolase     | Cardio-vascular diseases |
| 066 | Q13586            | 62 | 4 | 6.45 | Functional | X-ray    | Transporter | -             | Immunology               |
| 067 | Q969H0            | 73 | 9 | 12.3 | Functional | X-ray    | Other       | -             | Oncology                 |
| 068 | Q8IEW2            | 49 | 5 | 10.2 | Phenotypic | Homology | Other       | -             | Infectious Diseases      |
| 069 | P22513            | 63 | 0 | 0.0  | Phenotypic | X-ray    | Enzyme      | Other Enzymes | Infectious Diseases      |
| 070 | Q7DD94            | 80 | 0 | 0.0  | Phenotypic | X-ray    | Enzyme      | Transferase   | Infectious Diseases      |
| 071 | Q9Y265,<br>Q9Y230 | 81 | 0 | 0.0  | Functional | X-ray    | Enzyme      | Hydrolase     | Oncology                 |
| 072 | Q763K9            | 59 | 8 | 13.6 | Functional | X-ray    | Enzyme      | Transferase   | Infectious Diseases      |
| 073 | Q9NQ25            | 69 | 4 | 5.8  | Other      | Homology | Other       | -             | Immunology               |
| 074 | Q8RQE8            | 78 | 0 | 0.0  | Functional | Cryo-EM  | Enzyme      | Transferase   | Infectious Diseases      |
| 075 | O75385            | 58 | 6 | 10.3 | Functional | X-ray    | Enzyme      | Kinase        | Oncology                 |
| 076 | Q9GZU7            | 60 | 0 | 0.0  | Functional | X-ray    | Enzyme      | Hydrolase     | Oncology                 |

|     |        |     |   |      |            |          |             |               |                            |
|-----|--------|-----|---|------|------------|----------|-------------|---------------|----------------------------|
| 077 | P22314 | 75  | 5 | 6.67 | Functional | X-ray    | Enzyme      | Other Enzymes | Neurology                  |
| 078 | O75365 | 69  | 2 | 2.9  | Functional | X-ray    | Enzyme      | Hydrolase     | Oncology                   |
| 079 | Q9Y345 | 96  | 2 | 2.08 | Functional | Homology | Transporter | -             | Neurology                  |
| 080 | Q07812 | 87  | 1 | 1.15 | Other      | X-ray    | Other       | -             | Neurology                  |
| 081 | P62873 | 76  | 5 | 6.58 | Binding    | X-ray    | Other       | -             | Other                      |
| 082 | P25789 | 65  | 0 | 0.0  | Functional | Cryo-EM  | Enzyme      | Hydrolase     | Neurology                  |
| 083 | Q9NY59 | 78  | 0 | 0.0  | Functional | X-ray    | Enzyme      | Hydrolase     | Oncology                   |
| 084 | O43353 | 56  | 0 | 0.0  | Other      | X-ray    | Enzyme      | Kinase        | Immunology                 |
| 085 | Q9Y572 | 54  | 2 | 3.7  | Functional | Homology | Enzyme      | Kinase        | Immunology                 |
| 086 | P9WGZ1 | 167 | 3 | 1.8  | Binding    | X-ray    | Enzyme      | Transferase   | Infectious Diseases        |
| 087 | Q13526 | 81  | 0 | 0.0  | Phenotypic | X-ray    | Enzyme      | Other Enzymes | Oncology                   |
| 088 | P32783 | 58  | 0 | 0.0  | Binding    | X-ray    | Enzyme      | Transferase   | Infectious Diseases        |
| 089 | Q9UBN7 | 86  | 0 | 0.0  | Functional | X-ray    | Enzyme      | Hydrolase     | Endocrinology & Metabolism |
| 090 | Q9UKK9 | 51  | 1 | 1.96 | Functional | X-ray    | Enzyme      | Transferase   | Oncology                   |
| 091 | Q12923 | 75  | 4 | 5.33 | Functional | X-ray    | Enzyme      | Phosphatase   | Other                      |
| 092 | P30613 | 67  | 7 | 10.4 | Functional | X-ray    | Enzyme      | Kinase        | Oncology                   |
| 093 | Q16740 | 84  | 0 | 0.0  | Functional | X-ray    | Enzyme      | Hydrolase     | Oncology                   |
| 094 | P9WKI7 | 54  | 7 | 13.0 | Functional | X-ray    | Enzyme      | Other Enzymes | Infectious Diseases        |

|     |                   |    |   |      |            |          |        |               |                           |
|-----|-------------------|----|---|------|------------|----------|--------|---------------|---------------------------|
| 095 | Q91MB8            | 72 | 5 | 6.94 | Functional | X-ray    | Other  | -             | Infectious Diseases       |
| 096 | Q9Y251            | 45 | 9 | 20.0 | Functional | X-ray    | Enzyme | Hydrolase     | Oncology                  |
| 097 | P14340            | 76 | 2 | 2.63 | Functional | Homology | Enzyme | Hydrolase     | Infectious Diseases       |
| 098 | O60603,<br>Q15399 | 73 | 1 | 1.37 | Phenotypic | X-ray    | Other  | -             | Immunology                |
| 099 | P9WPC3            | 72 | 2 | 2.78 | Functional | X-ray    | Enzyme | Hydrolase     | Infectious Diseases       |
| 100 | O15294            | 57 | 2 | 3.51 | Functional | X-ray    | Enzyme | Transferase   | Oncology                  |
| 101 | P18177            | 46 | 0 | 0.0  | Functional | X-ray    | Enzyme | Hydrolase     | Infectious Diseases       |
| 102 | P32322            | 93 | 0 | 0.0  | Functional | X-ray    | Enzyme | Other Enzymes | Oncology                  |
| 103 | B1LMQ5            | 82 | 7 | 8.54 | Phenotypic | X-ray    | Enzyme | Hydrolase     | Infectious Diseases       |
| 104 | P15056            | 60 | 2 | 3.33 | Binding    | X-ray    | Enzyme | Kinase        | Oncology                  |
| 105 | P31153            | 96 | 0 | 0.0  | Functional | X-ray    | Enzyme | Transferase   | Oncology                  |
| 106 | P26358            | 66 | 2 | 3.03 | Binding    | X-ray    | Enzyme | Transferase   | Oncology                  |
| 107 | P11086            | 64 | 0 | 0.0  | Functional | X-ray    | Enzyme | Transferase   | Other                     |
| 108 | Q99ZW2            | 80 | 3 | 3.75 | Functional | Homology | Enzyme | Hydrolase     | Other                     |
| 109 | Q9NRL2            | 74 | 5 | 6.76 | Functional | X-ray    | Other  | -             | Rare diseases & Disorders |
| 110 | P25779            | 94 | 2 | 2.13 | Phenotypic | X-ray    | Enzyme | Hydrolase     | Other                     |

|     |        |    |    |      |            |          |        |               |                            |
|-----|--------|----|----|------|------------|----------|--------|---------------|----------------------------|
| 111 | Q02880 | 63 | 2  | 3.17 | Functional | X-ray    | Enzyme | Other Enzymes | Other                      |
| 112 | Q9H1Y0 | 67 | 4  | 5.97 | Phenotypic | X-ray    | Other  | -             | Oncology                   |
| 113 | Q9Y4P1 | 72 | 0  | 0.0  | Phenotypic | X-ray    | Enzyme | Hydrolase     | Oncology                   |
| 114 | Q8TDX7 | 46 | 0  | 0.0  | Phenotypic | X-ray    | Enzyme | Kinase        | Immunology                 |
| 115 | Q8FCR6 | 83 | 9  | 10.8 | Binding    | X-ray    | Enzyme | Other Enzymes | Infectious Diseases        |
| 116 | P63092 | 63 | 0  | 0.0  | Functional | Homology | Other  | -             | Endocrinology & Metabolism |
| 117 | Q12834 | 68 | 0  | 0.0  | Phenotypic | X-ray    | Other  | -             | Oncology                   |
| 118 | Q13257 | 77 | 0  | 0.0  | Phenotypic | X-ray    | Other  | -             | Oncology                   |
| 119 | Q96HS1 | 51 | 1  | 1.96 | Functional | X-ray    | Enzyme | Hydrolase     | Neurology                  |
| 120 | P05121 | 65 | 13 | 20.0 | Functional | X-ray    | Other  | -             | Rare diseases & Disorders  |
| 121 | Q9BUX1 | 73 | 7  | 9.59 | Functional | Homology | Enzyme | Other Enzymes | Cardio-vascular diseases   |
| 122 | P38398 | 74 | 0  | 0.0  | Phenotypic | X-ray    | Other  | -             | Oncology                   |
| 123 | O14929 | 94 | 10 | 10.6 | Functional | X-ray    | Enzyme | Transferase   | Oncology                   |
| 124 | P32322 | 80 | 4  | 5.0  | Functional | X-ray    | Enzyme | Other Enzymes | Oncology                   |
| 125 | P21554 | 95 | 0  | 0.0  | Functional | Cryo-EM  | GPCR   | -             | Neurology                  |
| 126 | Q96LB1 | 71 | 1  | 1.41 | Functional | Homology | GPCR   | -             | Immunology                 |
| 127 | P9WQ17 | 94 | 6  | 6.38 | Functional | X-ray    | Enzyme | Transferase   | Infectious Diseases        |

|     |                   |    |    |      |            |          |                         |               |                           |
|-----|-------------------|----|----|------|------------|----------|-------------------------|---------------|---------------------------|
| 128 | Q9NRX4            | 79 | 0  | 0.0  | Functional | X-ray    | Enzyme                  | Phosphatase   | Oncology                  |
| 129 | Q9UF12            | 94 | 0  | 0.0  | Functional | Homology | Enzyme                  | Other Enzymes | Other                     |
| 130 | Q5CYE4            | 94 | 5  | 5.32 | Phenotypic | X-ray    | Other                   | Other Enzymes | Infectious Diseases       |
| 131 | P03418            | 96 | 0  | 0.0  | Binding    | X-ray    | Other                   | -             | Infectious Diseases       |
| 132 | Q5TKA1,<br>Q52LA3 | 79 | 0  | 0.0  | Functional | X-ray    | Other                   | -             | Oncology                  |
| 133 | P9WI81            | 94 | 0  | 0.0  | Phenotypic | X-ray    | Enzyme                  | Kinase        | Infectious Diseases       |
| 134 | P09874            | 94 | 6  | 6.38 | Binding    | X-ray    | Enzyme                  | Transferase   | Oncology                  |
| 135 | P55072            | 87 | 14 | 16.1 | Functional | X-ray    | Enzyme                  | Hydrolase     | Oncology                  |
| 136 | O60264            | 83 | 4  | 4.82 | Other      | X-ray    | Enzyme                  | Hydrolase     | Rare diseases & Disorders |
| 137 | P14867            | 75 | 0  | 0.0  | Functional | X-ray    | Ion Channel             | -             | Other                     |
| 138 | E9QYP0            | 94 | 0  | 0.0  | Functional | X-ray    | Enzyme                  | Other Enzymes | Infectious Diseases       |
| 139 | P9WG47            | 94 | 0  | 0.0  | Functional | X-ray    | Enzyme                  | Transferase   | Infectious Diseases       |
| 140 | Q15303            | 94 | 0  | 0.0  | Functional | X-ray    | Enzyme                  | Kinase        | Cardio-vascular diseases  |
| 141 | P31483            | 83 | 2  | 2.41 | Phenotypic | Homology | DNA/RNA-binding protein | -             | Neurology                 |



|     |                   |     |    |      |            |          |                         |               |                          |
|-----|-------------------|-----|----|------|------------|----------|-------------------------|---------------|--------------------------|
| 142 | P12931            | 82  | 5  | 6.1  | Functional | X-ray    | Enzyme                  | Kinase        | Oncology                 |
| 143 | P0A031            | 96  | 10 | 10.4 | Functional | X-ray    | Other                   | -             | Infectious Diseases      |
| 144 | P34913            | 85  | 6  | 7.06 | Functional | X-ray    | Enzyme                  | Hydrolase     | Other                    |
| 145 | P9WG49            | 96  | 4  | 4.17 | Functional | X-ray    | Enzyme                  | Other Enzymes | Infectious Diseases      |
| 146 | Q9NZC2            | 82  | 11 | 13.4 | Binding    | Homology | Nuclear Receptor        | -             | Neurology                |
| 147 | P49354,<br>P49356 | 177 | 14 | 7.91 | Functional | X-ray    | Enzyme                  | Transferase   | Neurology                |
| 148 | Q15717            | 83  | 1  | 1.2  | Binding    | X-ray    | DNA/RNA-binding protein | -             | Neurology                |
| 149 | Q9L5C8            | 94  | 0  | 0.0  | Functional | X-ray    | Enzyme                  | Hydrolase     | Infectious Diseases      |
| 150 | P31539            | 84  | 6  | 7.14 | Functional | Cryo-EM  | Other                   | -             | Neurology                |
| 151 | O15554            | 82  | 2  | 2.44 | Functional | Cryo-EM  | Ion Channel             | -             | Immunology               |
| 152 | Q5W0Z9            | 64  | 1  | 1.56 | Binding    | X-ray    | Enzyme                  | Transferase   | Cardio-vascular diseases |
| 153 | P55851            | 182 | 8  | 4.4  | Binding    | Homology | Transporter             | -             | Oncology                 |
| 154 | P42345            | 94  | 30 | 31.9 | Binding    | Cryo-EM  | Enzyme                  | Kinase        | Oncology                 |
| 155 | Q9YLJ3            | 84  | 2  | 2.38 | Phenotypic | X-ray    | Other                   | -             | Infectious Diseases      |
| 156 | Q99836            | 94  | 9  | 9.57 | Functional | Homology | Other                   | -             | Oncology                 |

|     |        |     |    |      |            |          |                         |               |                            |
|-----|--------|-----|----|------|------------|----------|-------------------------|---------------|----------------------------|
| 157 | P04637 | 83  | 3  | 3.61 | Phenotypic | X-ray    | DNA/RNA-binding protein | -             | Oncology                   |
| 158 | P9WNM7 | 94  | 4  | 4.26 | Phenotypic | Homology | DNA/RNA-binding protein | -             | Infectious Diseases        |
| 159 | I6Y9J2 | 94  | 4  | 4.26 | Phenotypic | X-ray    | Enzyme                  | Transferase   | Infectious Diseases        |
| 160 | Q15118 | 164 | 2  | 1.22 | Functional | Homology | Enzyme                  | Kinase        | Oncology                   |
| 161 | P0DTC2 | 100 | 20 | 20.0 | Functional | X-ray    | Other                   | -             | Infectious Diseases        |
| 162 | P0DTC2 | 190 | 1  | 0.53 | Binding    | X-ray    | Enzyme                  | Protease      | Infectious Diseases        |
| 163 | P0DTD1 | 94  | 11 | 11.7 | Functional | Homology | Enzyme                  | Protease      | Infectious Diseases        |
| 164 | P0DTD1 | 94  | 15 | 16.0 | Functional | Cryo-EM  | Transporter             | Transferase   | Infectious Diseases        |
| 165 | Q8ZNV8 | 80  | 2  | 2.5  | Phenotypic | Homology | Transporter             | -             | Infectious Diseases        |
| 166 | P68135 | 83  | 7  | 8.43 | Functional | X-ray    | Other                   | -             | Oncology                   |
| 167 | O14842 | 111 | 29 | 26.1 | Phenotypic | X-ray    | GPCR                    | -             | Endocrinology & Metabolism |
| 168 | P15559 | 36  | 8  | 22.2 | Functional | X-ray    | Enzyme                  | Other Enzymes | Oncology                   |
| 169 | P52270 | 68  | 20 | 29.4 | Functional | X-ray    | Enzyme                  | Other Enzymes | Infectious Diseases        |
| 170 | P43490 | 94  | 3  | 3.19 | Phenotypic | X-ray    | Enzyme                  | Transferase   | Oncology                   |

|     |                |     |    |      |            |          |                         |             |                        |
|-----|----------------|-----|----|------|------------|----------|-------------------------|-------------|------------------------|
| 171 | Q99538         | 86  | 4  | 4.65 | Functional | X-ray    | Enzyme                  | Hydrolase   | Neurology              |
| 172 | P28335         | 94  | 5  | 5.32 | Functional | X-ray    | GPCR                    | -           | Neurology              |
| 173 | P12931         | 100 | 0  | 0.0  | Functional | X-ray    | Enzyme                  | Kinase      | Oncology               |
| 174 | A0A6L0XSJ<br>0 | 83  | 8  | 9.64 | Phenotypic | Cryo-EM  | Enzyme                  | Protease    | Infectious<br>Diseases |
| 175 | Q9H4A3         | 94  | 0  | 0.0  | Binding    | X-ray    | Enzyme                  | Kinase      | Oncology               |
| 176 | P0C0V0         | 87  | 3  | 3.45 | Functional | X-ray    | Enzyme                  | Protease    | Infectious<br>Diseases |
| 177 | Q9H9Z2         | 58  | 9  | 15.5 | Binding    | X-ray    | DNA/RNA-binding protein | -           | Oncology               |
| 178 | Q9R1M7         | 159 | 17 | 10.7 | Functional | X-ray    | Ion Channel             | -           | Neurology              |
| 179 | Q9NQU5         | 94  | 0  | 0.0  | Functional | X-ray    | Enzyme                  | Kinase      | Oncology               |
| 180 | A0A1D3GE<br>K4 | 74  | 3  | 4.05 | Phenotypic | Homology | Enzyme                  | Protease    | Infectious<br>Diseases |
| 181 | A0A066SS<br>Q2 | 84  | 3  | 3.57 | Phenotypic | Homology | Enzyme                  | Protease    | Infectious<br>Diseases |
| 182 | Q13469         | 85  | 8  | 9.41 | Functional | X-ray    | Transcription Factor    | -           | Immunology             |
| 183 | P9WNS3         | 94  | 5  | 5.32 | Binding    | X-ray    | Enzyme                  | Transferase | Infectious<br>Diseases |
| 184 | Q2FD70         | 94  | 3  | 3.19 | Phenotypic | Homology | Transporter             | -           | Infectious<br>Diseases |
| 185 | P31224         | 94  | 1  | 1.06 | Phenotypic | X-ray    | Transporter             | -           | Infectious<br>Diseases |

|     |        |     |    |      |            |          |                      |               |                     |
|-----|--------|-----|----|------|------------|----------|----------------------|---------------|---------------------|
| 186 | Q06330 | 67  | 7  | 10.4 | Functional | Homology | Transcription Factor | -             | Oncology            |
| 187 | P61157 | 90  | 10 | 11.1 | Other      | X-ray    | Other                | -             | Infectious Diseases |
| 188 | Q3HNM4 | 94  | 0  | 0.0  | Functional | X-ray    | Enzyme               | Kinase        | Infectious Diseases |
| 189 | Q15907 | 94  | 3  | 3.19 | Functional | X-ray    | Enzyme               | Hydrolase     | Other               |
| 190 | P9WNZ1 | 94  | 0  | 0.0  | Functional | Homology | Enzyme               | Transferase   | Infectious Diseases |
| 191 | P9WJY9 | 94  | 12 | 12.8 | Functional | X-ray    | Enzyme               | Transferase   | Infectious Diseases |
| 192 | Q9GPZ9 | 78  | 0  | 0.0  | Functional | X-ray    | Enzyme               | Other Enzymes | Infectious Diseases |
| 193 | O15392 | 93  | 7  | 7.53 | Phenotypic | X-ray    | Other                | -             | Oncology            |
| 194 | Q96D96 | 94  | 23 | 24.5 | Binding    | NMR      | Transporter          | -             | Oncology            |
| 195 | P35340 | 80  | 5  | 6.25 | Phenotypic | X-ray    | Enzyme               | Other Enzymes | Infectious Diseases |
| 196 | P52732 | 96  | 2  | 2.08 | Functional | X-ray    | Other                | -             | Oncology            |
| 197 | P52333 | 170 | 2  | 1.18 | Binding    | Homology | Enzyme               | Kinase        | Immunology          |
| 198 | P47895 | 82  | 4  | 4.88 | Functional | X-ray    | Enzyme               | Other Enzymes | Oncology            |
| 199 | P08631 | 87  | 3  | 3.45 | Phenotypic | X-ray    | Enzyme               | Kinase        | Oncology            |
| 200 | O43791 | 80  | 0  | 0.0  | Binding    | X-ray    | Enzyme               | Other Enzymes | Oncology            |

|     |                   |    |    |      |            |          |                         |               |                     |
|-----|-------------------|----|----|------|------------|----------|-------------------------|---------------|---------------------|
| 201 | Q15796            | 77 | 4  | 5.19 | Binding    | X-ray    | DNA/RNA-binding protein | -             | Oncology            |
| 202 | P21796            | 94 | 18 | 19.1 | Binding    | X-ray    | Transporter             | -             | Oncology            |
| 203 | Q9LAU2            | 96 | 11 | 11.5 | Functional | Homology | Enzyme                  | Phosphatase   | Infectious Diseases |
| 204 | Q9H6Y7            | 86 | 0  | 0.0  | Functional | Homology | Enzyme                  | Other Enzymes | Other               |
| 205 | K9WT99            | 96 | 2  | 2.08 | Functional | X-ray    | Enzyme                  | Other Enzymes | Oncology            |
| 206 | P50454            | 96 | 0  | 0.0  | Binding    | X-ray    | Transporter             | -             | Other               |
| 207 | P0AGC3            | 83 | 0  | 0.0  | Functional | X-ray    | Enzyme                  | Transferase   | Infectious Diseases |
| 208 | Q16822            | 84 | 5  | 5.95 | Functional | Homology | Enzyme                  | Other Enzymes | Oncology            |
| 209 | O35295            | 74 | 1  | 1.35 | Binding    | Homology | DNA/RNA-binding protein | -             | Oncology            |
| 210 | Q32ZE1            | 85 | 2  | 2.35 | Functional | X-ray    | Enzyme                  | Hydrolase     | Infectious Diseases |
| 211 | B0FLN1            | 86 | 6  | 6.98 | Phenotypic | Homology | Enzyme                  | Other Enzymes | Infectious Diseases |
| 212 | P61073            | 90 | 8  | 8.89 | Functional | X-ray    | GPCR                    | -             | Oncology            |
| 213 | P07949,<br>Q62997 | 88 | 2  | 2.27 | Functional | Cryo-EM  | Enzyme                  | Kinase        | Neurology           |
| 214 | Q16186            | 94 | 1  | 1.06 | Binding    | X-ray    | Enzyme                  | Protease      | Oncology            |

|     |        |    |    |      |            |          |                         |               |                            |
|-----|--------|----|----|------|------------|----------|-------------------------|---------------|----------------------------|
| 215 | P11498 | 94 | 4  | 4.26 | Functional | X-ray    | Enzyme                  | Other Enzymes | Endocrinology & Metabolism |
| 216 | P9WMH1 | 88 | 8  | 9.09 | Phenotypic | X-ray    | Transcription Factor    | -             | Infectious Diseases        |
| 217 | Q8NEB9 | 78 | 5  | 6.41 | Phenotypic | X-ray    | Enzyme                  | Kinase        | Oncology                   |
| 218 | P11474 | 73 | 4  | 5.48 | Functional | X-ray    | Other                   | -             | Oncology                   |
| 219 | P03518 | 97 | 3  | 3.09 | Functional | X-ray    | Other                   | -             | Infectious Diseases        |
| 220 | P49821 | 87 | 0  | 0.0  | Functional | Cryo-EM  | Enzyme                  | Other Enzymes | Oncology                   |
| 221 | P08134 | 85 | 1  | 1.18 | Phenotypic | X-ray    | Other                   | -             | Oncology                   |
| 222 | O15294 | 94 | 2  | 2.13 | Binding    | X-ray    | Enzyme                  | Transferase   | Oncology                   |
| 223 | O15554 | 83 | 3  | 3.61 | Functional | Cryo-EM  | Ion Channel             | -             | Immunology                 |
| 224 | Q02127 | 94 | 11 | 11.7 | Functional | X-ray    | Enzyme                  | Other Enzymes | Oncology                   |
| 225 | Q5QD14 | 94 | 2  | 2.13 | Functional | Homology | GPCR                    | -             | Neurology                  |
| 226 | Q76R61 | 94 | 3  | 3.19 | Phenotypic | X-ray    | DNA/RNA-binding protein | -             | Other                      |
| 227 | P0C8L0 | 94 | 1  | 1.06 | Functional | Homology | Other                   | -             | Infectious Diseases        |
| 228 | P07237 | 94 | 5  | 5.32 | Functional | X-ray    | Enzyme                  | Other Enzymes | Cardio-vascular diseases   |
| 229 | Q15311 | 94 | 0  | 0.0  | Phenotypic | NMR      | Transporter             | -             | Oncology                   |
| 230 | Q5VWK5 | 94 | 0  | 0.0  | Functional | X-ray    | Other                   | -             | Immunology                 |

|     |                |     |    |      |            |          |                      |               |                            |
|-----|----------------|-----|----|------|------------|----------|----------------------|---------------|----------------------------|
| 231 | Q9UH17         | 85  | 0  | 0.0  | Binding    | X-ray    | Enzyme               | Hydrolase     | Oncology                   |
| 232 | Q8JUX6         | 104 | 0  | 0.0  | Functional | X-ray    | Enzyme               | Protease      | Infectious Diseases        |
| 233 | Q5UB51         | 68  | 3  | 4.41 | Binding    | X-ray    | Enzyme               | Protease      | Infectious Diseases        |
| 234 | Q5CVN0         | 83  | 0  | 0.0  | Functional | Homology | Enzyme               | Other Enzymes | Infectious Diseases        |
| 235 | P13569         | 94  | 9  | 9.57 | Functional | Cryo-EM  | Ion Channel          | -             | Rare diseases & Disorders  |
| 236 | Q8NBP7         | 94  | 5  | 5.32 | Functional | X-ray    | Enzyme               | Hydrolase     | Cardio-vascular diseases   |
| 237 | P09960         | 76  | 9  | 11.8 | Functional | X-ray    | Enzyme               | Hydrolase     | Immunology                 |
| 238 | Q99720         | 81  | 19 | 23.5 | Binding    | X-ray    | Other                | -             | Neurology                  |
| 239 | P13945         | 84  | 16 | 19.1 | Other      | Homology | GPCR                 | -             | Endocrinology & Metabolism |
| 240 | P12883         | 84  | 1  | 1.19 | Functional | X-ray    | Enzyme               | Hydrolase     | Cardio-vascular diseases   |
| 241 | Q6P988         | 87  | 0  | 0.0  | Functional | X-ray    | Enzyme               | Hydrolase     | Neurology                  |
| 242 | Q16526         | 177 | 6  | 3.39 | Functional | Homology | Transcription Factor | -             | Other                      |
| 243 | O00522, Q9ULI3 | 94  | 2  | 2.13 | Binding    | X-ray    | Other                | -             | Cardio-vascular diseases   |
| 244 | Q96PN6         | 85  | 0  | 0.0  | Functional | X-ray    | Enzyme               | Other Enzymes | Other                      |

|     |                   |    |    |      |            |          |                      |               |                            |
|-----|-------------------|----|----|------|------------|----------|----------------------|---------------|----------------------------|
| 245 | O55143            | 74 | 4  | 5.41 | Binding    | Homology | Enzyme               | Hydrolase     | Other                      |
| 246 | J9QQY6            | 94 | 0  | 0.0  | Functional | Homology | Other                | -             | Infectious Diseases        |
| 247 | P13501            | 83 | 1  | 1.2  | Binding    | X-ray    | Other                | Other Enzymes | Cardio-vascular diseases   |
| 248 | O00429            | 81 | 6  | 7.41 | Binding    | X-ray    | Enzyme               | Hydrolase     | Neurology                  |
| 249 | Q99497            | 96 | 1  | 1.04 | Functional | X-ray    | Other                | -             | Oncology                   |
| 250 | Q15758            | 94 | 12 | 12.8 | Functional | Cryo-EM  | Transporter          | -             | Oncology                   |
| 251 | Q16548            | 94 | 35 | 37.2 | Functional | X-ray    | Other                | Other Enzymes | Immunology                 |
| 252 | Q92793            | 89 | 10 | 11.2 | Functional | X-ray    | Enzyme               | Transferase   | Oncology                   |
| 253 | Q09427            | 96 | 3  | 3.12 | Functional | Cryo-EM  | Ion Channel          | -             | Endocrinology & Metabolism |
| 254 | O95786            | 94 | 2  | 2.13 | Functional | X-ray    | Enzyme               | Hydrolase     | Immunology                 |
| 255 | P16220            | 94 | 5  | 5.32 | Other      | X-ray    | Transcription Factor | -             | Oncology                   |
| 256 | A1Z1Q3            | 82 | 2  | 2.44 | Binding    | X-ray    | Enzyme               | Hydrolase     | Oncology                   |
| 257 | Q814Y5            | 83 | 5  | 6.02 | Functional | X-ray    | Other                | -             | Infectious Diseases        |
| 258 | O14924,<br>O43566 | 96 | 2  | 2.08 | Functional | NMR      | GPCR                 | -             | Neurology                  |
| 259 | A0QTK6            | 84 | 2  | 2.38 | Functional | Cryo-EM  | Other                | -             | Infectious Diseases        |
| 260 | C6TCZ5            | 85 | 5  | 5.88 | Functional | X-ray    | Other                | Other Enzymes | Other                      |



|     |        |    |    |      |            |          |                            |                  |                              |
|-----|--------|----|----|------|------------|----------|----------------------------|------------------|------------------------------|
| 261 | Q9Y251 | 81 | 5  | 6.17 | Functional | X-ray    | Enzyme                     | Hydrolase        | Oncology                     |
| 262 | Q9H255 | 94 | 10 | 10.6 | Functional | Homology | GPCR                       | -                | Oncology                     |
| 263 | P06400 | 94 | 15 | 16.0 | Binding    | X-ray    | Other                      | -                | Neurology                    |
| 264 | Q04206 | 84 | 7  | 8.33 | Functional | X-ray    | Transcription<br>Factor    | -                | Oncology                     |
| 265 | P14778 | 82 | 5  | 6.1  | Binding    | X-ray    | Other                      | -                | Immunology                   |
| 266 | Q9Y217 | 73 | 0  | 0.0  | Phenotypic | Homology | Enzyme                     | Kinase           | Infectious<br>Diseases       |
| 267 | P0DTC2 | 94 | 1  | 1.06 | Functional | Cryo-EM  | Other                      | -                | Infectious<br>Diseases       |
| 268 | Q13255 | 82 | 5  | 6.1  | Functional | Homology | GPCR                       | -                | Neurology                    |
| 269 | Q99986 | 81 | 3  | 3.7  | Functional | X-ray    | Enzyme                     | Kinase           | Oncology                     |
| 270 | P16885 | 85 | 1  | 1.18 | Binding    | Homology | Enzyme                     | Hydrolase        | Neurology                    |
| 271 | Q8IY81 | 85 | 3  | 3.53 | Phenotypic | Homology | Enzyme                     | Transferase      | Oncology                     |
| 272 | Q93096 | 84 | 0  | 0.0  | Functional | X-ray    | Enzyme                     | Phosphatase      | Cardio-vascular<br>diseases  |
| 273 | Q8WTS1 | 70 | 6  | 8.57 | Binding    | Homology | Enzyme                     | Transferase      | Other                        |
| 274 | Q14498 | 80 | 1  | 1.25 | Phenotypic | X-ray    | DNA/RNA-binding<br>protein | Other<br>Enzymes | Oncology                     |
| 275 | P0DTD1 | 94 | 0  | 0.0  | Functional | X-ray    | Enzyme                     | Protease         | Infectious<br>Diseases       |
| 276 | Q8N9F0 | 63 | 5  | 7.94 | Functional | X-ray    | Enzyme                     | Transferase      | Rare diseases<br>& Disorders |

|     |                |    |    |      |            |          |                         |               |                            |
|-----|----------------|----|----|------|------------|----------|-------------------------|---------------|----------------------------|
| 277 | P47870         | 84 | 0  | 0.0  | Functional | Cryo-EM  | Ion Channel             | -             | Other                      |
| 278 | P0A1S2         | 93 | 5  | 5.38 | Binding    | X-ray    | DNA/RNA-binding protein | -             | Infectious Diseases        |
| 279 | P9WG83         | 73 | 10 | 13.7 | Functional | Homology | Enzyme                  | Other Enzymes | Infectious Diseases        |
| 280 | A0A0H3JDV8     | 81 | 1  | 1.23 | Functional | X-ray    | Enzyme                  | Transferase   | Infectious Diseases        |
| 281 | Q9NZC9         | 81 | 0  | 0.0  | Functional | Homology | DNA/RNA-binding protein | -             | Oncology                   |
| 282 | Q9Y5X0         | 84 | 0  | 0.0  | Binding    | X-ray    | Enzyme                  | Transferase   | Other                      |
| 283 | P14222         | 72 | 4  | 5.56 | Functional | Homology | Other                   | -             | Infectious Diseases        |
| 284 | Q9Y265, Q9Y230 | 94 | 0  | 0.0  | Functional | Cryo-EM  | Enzyme                  | Hydrolase     | Oncology                   |
| 285 | Q92835         | 83 | 13 | 15.7 | Functional | X-ray    | Enzyme                  | Phosphatase   | Neurology                  |
| 286 | Q9H008         | 68 | 5  | 7.35 | Binding    | X-ray    | Enzyme                  | Phosphatase   | Oncology                   |
| 287 | Q13501         | 94 | 17 | 18.1 | Functional | X-ray    | Other                   | -             | Cardio-vascular diseases   |
| 288 | P37231         | 87 | 6  | 6.9  | Phenotypic | X-ray    | Other                   | -             | Endocrinology & Metabolism |
| 289 | P25787, P25789 | 82 | 2  | 2.44 | Functional | Cryo-EM  | Other                   | -             | Neurology                  |
| 290 | Q99638         | 82 | 0  | 0.0  | Phenotypic | X-ray    | Other                   | -             | Oncology                   |

|     |        |    |   |      |            |          |             |               |                           |
|-----|--------|----|---|------|------------|----------|-------------|---------------|---------------------------|
| 291 | P04062 | 62 | 7 | 11.3 | Phenotypic | X-ray    | Enzyme      | Hydrolase     | Rare diseases & Disorders |
| 292 | P10265 | 83 | 5 | 6.02 | Phenotypic | Homology | Enzyme      | Protease      | Neurology                 |
| 293 | P22830 | 81 | 1 | 1.23 | Functional | X-ray    | Enzyme      | Other Enzymes | Other                     |
| 294 | P18887 | 94 | 1 | 1.06 | Phenotypic | X-ray    | Other       | -             | Oncology                  |
| 295 | O95833 | 94 | 3 | 3.19 | Functional | X-ray    | Ion Channel | -             | Oncology                  |
| 296 | Q8NBP7 | 94 | 1 | 1.06 | Functional | X-ray    | Enzyme      | Protease      | Cardio-vascular diseases  |

**Supplementary Table 3.** Hit identification results for 296 AIMS projects.

| Project Number | Uniprot ID     | Structure                                                                           | Mass   | Purity (%) | MW  | HBD | HBA | Rot | cLogP | MR  | TPSA | QED  |
|----------------|----------------|-------------------------------------------------------------------------------------|--------|------------|-----|-----|-----|-----|-------|-----|------|------|
| 001            | Q9NZQ7         | 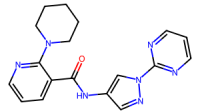   | 349.39 | 92.3       | 349 | 1   | 7   | 4   | 2.3   | 97  | 89   | 0.78 |
| 002            | Q9UBT2, Q9UBE0 |    | 342.78 | 100        | 343 | 2   | 6   | 5   | 2.34  | 91  | 99   | 0.74 |
| 003            | Q9HBX9         |    | 362.81 | 100        | 363 | 2   | 4   | 4   | 4.0   | 92  | 76   | 0.74 |
| 004            | Q96KS0         |  | 437.61 | 90.012     | 438 | 1   | 6   | 6   | 4.08  | 128 | 61   | 0.63 |



|     |        |                                                                                     |        |     |     |   |   |   |      |     |     |      |
|-----|--------|-------------------------------------------------------------------------------------|--------|-----|-----|---|---|---|------|-----|-----|------|
| 016 | Q9UL51 | 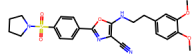   | 482.56 | 95  | 483 | 1 | 8 | 9 | 3.67 | 126 | 118 | 0.49 |
| 017 | Q92743 |    | 397.38 | 100 | 397 | 1 | 7 | 8 | 3.02 | 104 | 118 | 0.58 |
| 019 | Q9NVD7 |    | 401.35 | 100 | 401 | 1 | 8 | 6 | 3.52 | 96  | 95  | 0.53 |
| 020 | Q8NBL1 |   | 390.51 | 100 | 391 | 2 | 3 | 5 | 2.91 | 105 | 58  | 0.81 |
| 022 | Q9Y623 |  | 444.60 | 100 | 445 | 2 | 7 | 7 | 4.39 | 121 | 84  | 0.44 |

|     |        |                                                                                     |        |      |     |   |    |   |      |     |     |      |
|-----|--------|-------------------------------------------------------------------------------------|--------|------|-----|---|----|---|------|-----|-----|------|
| 023 | Q8TE49 | 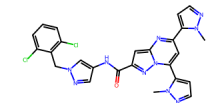   | 547.40 | 86.9 | 547 | 1 | 10 | 6 | 4.33 | 143 | 113 | 0.33 |
| 024 | Q8WZ42 |    | 410.38 | 100  | 410 | 3 | 5  | 4 | 2.94 | 106 | 100 | 0.48 |
| 025 | P9WJJ5 |    | 471.46 | 97.3 | 471 | 1 | 9  | 4 | 1.53 | 119 | 105 | 0.61 |
| 026 | Q92835 |   | 479.55 | 94   | 480 | 2 | 6  | 8 | 3.06 | 130 | 117 | 0.4  |
| 028 | P28827 |  | 397.40 | 94   | 397 | 1 | 4  | 6 | 2.31 | 102 | 79  | 0.76 |

|     |        |                                                                                     |        |     |     |   |   |   |      |     |     |      |
|-----|--------|-------------------------------------------------------------------------------------|--------|-----|-----|---|---|---|------|-----|-----|------|
| 029 | P25779 | 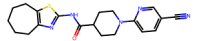   | 381.50 | 100 | 382 | 1 | 6 | 3 | 3.53 | 106 | 82  | 0.82 |
| 032 | Q8IXI2 |    | 367.83 | 90  | 368 | 2 | 8 | 5 | 2.41 | 94  | 108 | 0.83 |
| 035 | Q13936 |    | 519.57 | 93  | 520 | 2 | 7 | 5 | 5.36 | 129 | 111 | 0.37 |
| 036 | P49902 |   | 405.49 | 99  | 405 | 2 | 3 | 4 | 5.49 | 115 | 58  | 0.47 |
| 037 | Q4WUS9 |  | 368.38 | 100 | 368 | 1 | 4 | 3 | 4.24 | 100 | 46  | 0.75 |



|     |        |                                                                                     |        |     |     |   |   |   |      |     |    |      |
|-----|--------|-------------------------------------------------------------------------------------|--------|-----|-----|---|---|---|------|-----|----|------|
| 039 | Q9BRQ0 | 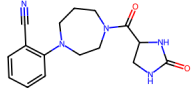   | 313.35 | 93  | 313 | 2 | 4 | 2 | 0.28 | 85  | 88 | 0.82 |
| 040 | Q7PRZ8 |    | 435.31 | 97  | 435 | 0 | 6 | 7 | 3.55 | 105 | 61 | 0.62 |
| 041 | Q13009 |    | 338.30 | 93  | 338 | 1 | 2 | 3 | 3.43 | 81  | 46 | 0.87 |
| 043 | P09237 |   | 344.34 | 100 | 344 | 2 | 6 | 4 | 2.56 | 87  | 93 | 0.76 |
| 044 | P28223 |  | 347.84 | 90  | 348 | 1 | 5 | 5 | 2.88 | 92  | 48 | 0.9  |

|     |        |                                                                                     |        |    |     |   |   |   |      |     |     |      |
|-----|--------|-------------------------------------------------------------------------------------|--------|----|-----|---|---|---|------|-----|-----|------|
| 045 | Q04IN8 | 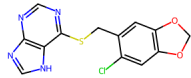   | 320.76 | 99 | 321 | 1 | 6 | 3 | 3.03 | 79  | 73  | 0.59 |
| 046 | P18031 |    | 618.57 | 96 | 619 | 5 | 9 | 9 | 3.61 | 159 | 151 | 0.23 |
| 049 | P50148 |    | 316.40 | 94 | 316 | 2 | 4 | 3 | 3.2  | 83  | 63  | 0.73 |
| 050 | O00308 |   | 363.38 | 93 | 363 | 2 | 3 | 5 | 4.84 | 102 | 71  | 0.53 |
| 051 | P28827 |  | 446.44 | 90 | 446 | 0 | 9 | 6 | 1.06 | 107 | 145 | 0.4  |

|     |        |                                                                                     |        |    |     |   |   |   |      |     |    |      |
|-----|--------|-------------------------------------------------------------------------------------|--------|----|-----|---|---|---|------|-----|----|------|
| 052 | P12004 | 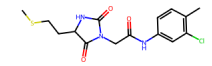   | 355.84 | 97 | 356 | 2 | 4 | 6 | 2.26 | 92  | 79 | 0.77 |
| 053 | P55072 |    | 410.27 | 90 | 410 | 2 | 6 | 4 | 5.36 | 110 | 84 | 0.35 |
| 055 | Q05086 |    | 356.68 | 99 | 357 | 1 | 4 | 2 | 4.96 | 81  | 60 | 0.7  |
| 056 | Q66479 |   | 361.77 | 97 | 362 | 1 | 2 | 4 | 4.28 | 91  | 49 | 0.75 |
| 057 | O96693 |  | 391.45 | 95 | 391 | 2 | 7 | 5 | 3.32 | 108 | 98 | 0.54 |

|     |        |                                                                                     |        |     |     |   |   |    |      |     |     |      |
|-----|--------|-------------------------------------------------------------------------------------|--------|-----|-----|---|---|----|------|-----|-----|------|
| 059 | Q16740 | 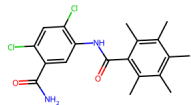   | 379.29 | 96  | 379 | 2 | 2 | 3  | 4.89 | 103 | 72  | 0.8  |
| 060 | O15178 |    | 374.40 | 92  | 374 | 3 | 6 | 5  | 2.75 | 105 | 135 | 0.63 |
| 061 | Q9JJX6 |    | 369.81 | 100 | 370 | 1 | 7 | 5  | 4.2  | 98  | 90  | 0.56 |
| 062 | P31350 |   | 455.52 | 100 | 456 | 1 | 6 | 8  | 5.19 | 129 | 83  | 0.39 |
| 063 | O95631 |  | 459.92 | 92  | 460 | 2 | 5 | 10 | 2.79 | 120 | 97  | 0.42 |

|     |        |                                                                                     |        |     |     |   |   |   |      |     |     |      |
|-----|--------|-------------------------------------------------------------------------------------|--------|-----|-----|---|---|---|------|-----|-----|------|
| 066 | Q13586 | 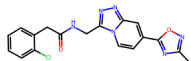   | 382.80 | 95  | 383 | 1 | 7 | 5 | 2.6  | 98  | 98  | 0.57 |
| 067 | Q969H0 |    | 382.82 | 97  | 383 | 2 | 5 | 5 | 2.75 | 96  | 102 | 0.77 |
| 068 | Q8IEW2 |    | 419.50 | 99  | 420 | 1 | 8 | 4 | 3.44 | 117 | 89  | 0.55 |
| 072 | Q763K9 |   | 348.35 | 100 | 348 | 1 | 7 | 4 | 3.21 | 86  | 90  | 0.78 |
| 073 | Q9NQ25 |  | 345.17 | 95  | 345 | 1 | 6 | 4 | 2.47 | 72  | 81  | 0.86 |

|     |        |                                                                                     |        |     |     |   |   |   |      |     |     |      |
|-----|--------|-------------------------------------------------------------------------------------|--------|-----|-----|---|---|---|------|-----|-----|------|
| 075 | O75385 | 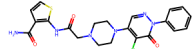   | 472.95 | 95  | 473 | 2 | 8 | 6 | 1.81 | 125 | 114 | 0.57 |
| 077 | P22314 |    | 395.36 | 100 | 395 | 1 | 5 | 4 | 2.88 | 89  | 100 | 0.8  |
| 078 | O75365 |    | 366.29 | 92  | 366 | 1 | 6 | 4 | 2.53 | 85  | 92  | 0.77 |
| 079 | Q9Y345 |   | 384.88 | 100 | 385 | 0 | 5 | 4 | 4.91 | 104 | 44  | 0.6  |
| 080 | Q07812 |  | 441.46 | 97  | 441 | 2 | 7 | 5 | 2.87 | 104 | 101 | 0.63 |

|     |        |                                                                                     |        |     |     |   |   |   |      |     |    |      |
|-----|--------|-------------------------------------------------------------------------------------|--------|-----|-----|---|---|---|------|-----|----|------|
| 081 | P62873 | 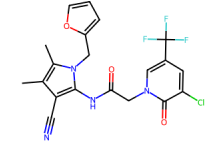   | 452.81 | 97  | 453 | 1 | 6 | 5 | 4.09 | 106 | 93 | 0.63 |
| 085 | Q9Y572 |    | 600.11 | 99  | 600 | 1 | 8 | 7 | 6.68 | 168 | 96 | 0.25 |
| 086 | P9WGZ1 |    | 434.56 | 100 | 435 | 1 | 7 | 7 | 3.33 | 111 | 92 | 0.57 |
| 090 | Q9UKK9 |   | 518.41 | 100 | 518 | 2 | 6 | 5 | 6.93 | 122 | 81 | 0.25 |
| 091 | Q12923 |  | 430.85 | 98  | 431 | 0 | 5 | 7 | 4.75 | 112 | 61 | 0.54 |

|     |        |                                                                                     |        |    |     |   |   |   |      |     |     |      |
|-----|--------|-------------------------------------------------------------------------------------|--------|----|-----|---|---|---|------|-----|-----|------|
| 092 | P30613 | 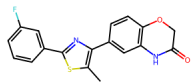   | 340.37 | 97 | 340 | 1 | 4 | 2 | 4.26 | 92  | 51  | 0.76 |
| 094 | P9WK17 |    | 354.36 | 99 | 354 | 3 | 6 | 4 | 0.49 | 95  | 116 | 0.63 |
| 095 | Q91MB8 |    | 437.57 | 98 | 438 | 2 | 5 | 9 | 4.22 | 128 | 90  | 0.52 |
| 096 | Q9Y251 |   | 336.34 | 99 | 336 | 1 | 5 | 4 | 3.69 | 92  | 81  | 0.73 |
| 097 | P14340 |  | 402.89 | 90 | 403 | 0 | 5 | 6 | 1.76 | 97  | 84  | 0.68 |



|     |                |                                                                                     |        |     |     |   |   |   |      |    |     |      |
|-----|----------------|-------------------------------------------------------------------------------------|--------|-----|-----|---|---|---|------|----|-----|------|
| 098 | O60603, Q15399 | 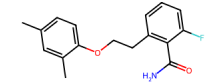   | 287.33 | 98  | 287 | 1 | 2 | 5 | 3.16 | 80 | 52  | 0.92 |
| 099 | P9WPC3         |    | 354.84 | 100 | 355 | 2 | 3 | 3 | 4.96 | 99 | 66  | 0.65 |
| 100 | O15294         |    | 348.39 | 95  | 348 | 2 | 3 | 6 | 2.19 | 90 | 89  | 0.84 |
| 103 | B1LMQ5         |   | 335.81 | 92  | 336 | 2 | 4 | 4 | 3.03 | 86 | 96  | 0.9  |
| 104 | P15056         |  | 319.36 | 100 | 319 | 2 | 7 | 5 | 2.61 | 91 | 102 | 0.74 |

|     |        |                                                                                     |        |     |     |   |   |   |      |     |     |      |
|-----|--------|-------------------------------------------------------------------------------------|--------|-----|-----|---|---|---|------|-----|-----|------|
| 106 | P26358 | 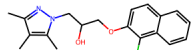   | 344.83 | 100 | 345 | 1 | 4 | 5 | 4.05 | 97  | 47  | 0.76 |
| 108 | Q99ZW2 |    | 368.75 | 90  | 369 | 3 | 5 | 4 | 2.22 | 88  | 138 | 0.48 |
| 109 | Q9NRL2 |    | 332.25 | 96  | 332 | 1 | 7 | 5 | 2.29 | 79  | 120 | 0.56 |
| 110 | P25779 |   | 457.49 | 90  | 458 | 2 | 5 | 9 | 2.53 | 121 | 105 | 0.56 |
| 111 | Q02880 |  | 344.77 | 100 | 345 | 2 | 3 | 4 | 3.49 | 91  | 68  | 0.89 |

|     |        |                                                                                     |        |     |     |   |   |   |      |     |     |      |
|-----|--------|-------------------------------------------------------------------------------------|--------|-----|-----|---|---|---|------|-----|-----|------|
| 112 | Q9HIY0 | 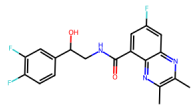   | 375.34 | 98  | 375 | 2 | 4 | 4 | 3.13 | 93  | 75  | 0.73 |
| 115 | Q8FCR6 |    | 479.40 | 94  | 479 | 2 | 6 | 6 | 4.39 | 115 | 116 | 0.6  |
| 119 | Q96HS1 |    | 329.29 | 100 | 329 | 3 | 5 | 8 | 1.89 | 82  | 120 | 0.63 |
| 120 | P05121 |   | 342.37 | 97  | 342 | 0 | 7 | 4 | 2.0  | 90  | 85  | 0.67 |
| 121 | Q9BUX1 |  | 233.29 | 99  | 233 | 1 | 4 | 4 | 1.5  | 64  | 59  | 0.81 |

|     |        |                                                                                     |        |     |     |   |   |   |      |     |    |      |
|-----|--------|-------------------------------------------------------------------------------------|--------|-----|-----|---|---|---|------|-----|----|------|
| 123 | O14929 | 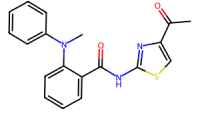   | 351.42 | 93  | 351 | 1 | 5 | 5 | 4.37 | 101 | 62 | 0.69 |
| 124 | P32322 |    | 312.40 | 100 | 312 | 1 | 3 | 4 | 3.98 | 92  | 53 | 0.93 |
| 126 | Q96LB1 |    | 490.68 | 99  | 491 | 2 | 3 | 8 | 5.66 | 147 | 65 | 0.47 |
| 127 | P9WQ17 |   | 314.40 | 100 | 314 | 1 | 6 | 3 | 3.67 | 90  | 54 | 0.8  |
| 130 | Q5CYE4 |  | 427.50 | 100 | 428 | 1 | 5 | 6 | 5.25 | 125 | 73 | 0.43 |

|     |        |                                                                                     |        |     |     |   |   |   |      |     |    |      |
|-----|--------|-------------------------------------------------------------------------------------|--------|-----|-----|---|---|---|------|-----|----|------|
| 134 | P09874 | 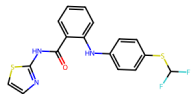   | 377.43 | 100 | 377 | 2 | 5 | 6 | 5.45 | 98  | 54 | 0.56 |
| 135 | P55072 |    | 456.54 | 90  | 457 | 1 | 4 | 4 | 5.34 | 128 | 61 | 0.42 |
| 136 | O60264 |    | 339.39 | 94  | 339 | 0 | 8 | 4 | 1.23 | 96  | 72 | 0.71 |
| 141 | P31483 |   | 288.08 | 100 | 288 | 0 | 5 | 3 | 3.43 | 66  | 70 | 0.64 |
| 142 | P12931 |  | 284.36 | 90  | 284 | 2 | 6 | 5 | 0.91 | 72  | 98 | 0.85 |

|     |                |                                                                                     |        |    |     |   |   |   |      |    |    |      |
|-----|----------------|-------------------------------------------------------------------------------------|--------|----|-----|---|---|---|------|----|----|------|
| 143 | P0A031         | 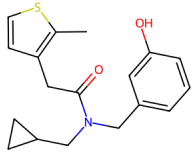   | 315.43 | 97 | 315 | 1 | 3 | 6 | 3.74 | 89 | 41 | 0.88 |
| 144 | P34913         |    | 324.42 | 90 | 324 | 1 | 2 | 3 | 3.07 | 96 | 49 | 0.94 |
| 145 | P9WG49         |    | 391.49 | 94 | 391 | 0 | 9 | 7 | 3.49 | 98 | 82 | 0.35 |
| 146 | Q9NZC2         |   | 302.27 | 91 | 302 | 2 | 2 | 3 | 3.71 | 79 | 54 | 0.77 |
| 147 | P49354, P49356 |  | 293.36 | 91 | 293 | 0 | 3 | 3 | 3.08 | 83 | 46 | 0.87 |

|     |        |                                                                                     |        |     |     |   |   |   |      |     |     |      |
|-----|--------|-------------------------------------------------------------------------------------|--------|-----|-----|---|---|---|------|-----|-----|------|
| 148 | Q15717 | 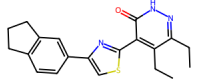   | 351.46 | 90  | 351 | 1 | 4 | 4 | 4.17 | 102 | 59  | 0.77 |
| 150 | P31539 |    | 340.46 | 90  | 340 | 2 | 4 | 5 | 2.19 | 89  | 79  | 0.88 |
| 151 | O15554 |    | 354.23 | 90  | 354 | 0 | 3 | 2 | 3.15 | 89  | 47  | 0.61 |
| 152 | Q5W0Z9 |   | 421.38 | 100 | 421 | 0 | 4 | 6 | 6.34 | 118 | 35  | 0.44 |
| 153 | P55851 |  | 345.30 | 90  | 345 | 2 | 6 | 5 | 2.38 | 87  | 103 | 0.86 |

|     |        |                                                                                     |        |     |     |   |   |    |      |     |    |      |
|-----|--------|-------------------------------------------------------------------------------------|--------|-----|-----|---|---|----|------|-----|----|------|
| 154 | P42345 | 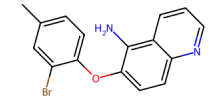   | 329.19 | 95  | 329 | 1 | 3 | 2  | 4.68 | 85  | 48 | 0.69 |
| 155 | Q9YLJ3 |    | 328.75 | 90  | 329 | 2 | 5 | 5  | 3.1  | 87  | 94 | 0.75 |
| 156 | Q99836 |    | 375.28 | 94  | 375 | 0 | 3 | 2  | 4.72 | 96  | 33 | 0.76 |
| 157 | P04637 |   | 412.43 | 90  | 412 | 0 | 6 | 10 | 3.22 | 101 | 99 | 0.34 |
| 158 | P9WNM7 |  | 324.42 | 100 | 324 | 0 | 5 | 4  | 5.24 | 91  | 39 | 0.48 |



|     |        |                                                                                     |        |     |     |   |   |   |      |     |    |      |
|-----|--------|-------------------------------------------------------------------------------------|--------|-----|-----|---|---|---|------|-----|----|------|
| 159 | 16Y9J2 | 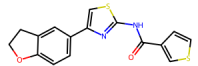   | 328.41 | 95  | 328 | 1 | 5 | 3 | 4.06 | 89  | 51 | 0.79 |
| 160 | Q15118 |    | 377.43 | 90  | 377 | 2 | 3 | 5 | 4.37 | 96  | 83 | 0.81 |
| 161 | P0DTC2 |    | 423.70 | 100 | 424 | 0 | 5 | 3 | 4.64 | 85  | 61 | 0.58 |
| 162 | P0DTC2 |   | 477.76 | 100 | 478 | 1 | 6 | 5 | 4.49 | 112 | 80 | 0.59 |
| 163 | P0DTD1 |  | 413.49 | 97  | 413 | 2 | 4 | 6 | 4.09 | 113 | 97 | 0.75 |

|     |        |                                                                                     |        |    |     |   |   |   |      |     |     |      |
|-----|--------|-------------------------------------------------------------------------------------|--------|----|-----|---|---|---|------|-----|-----|------|
| 164 | P0DTD1 | 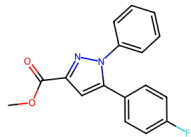   | 296.30 | 96 | 296 | 0 | 4 | 3 | 3.47 | 80  | 44  | 0.7  |
| 165 | Q8ZNV8 |    | 492.60 | 90 | 493 | 4 | 7 | 8 | 2.02 | 125 | 142 | 0.27 |
| 166 | P68135 |    | 367.49 | 97 | 367 | 0 | 5 | 4 | 2.83 | 105 | 54  | 0.83 |
| 167 | O14842 |   | 355.47 | 90 | 355 | 0 | 4 | 4 | 4.32 | 103 | 47  | 0.82 |
| 168 | P15559 |  | 315.75 | 98 | 316 | 0 | 4 | 4 | 4.33 | 84  | 52  | 0.67 |

|     |            |                                                                                     |        |    |     |   |   |   |      |     |    |      |
|-----|------------|-------------------------------------------------------------------------------------|--------|----|-----|---|---|---|------|-----|----|------|
| 169 | P52270     | 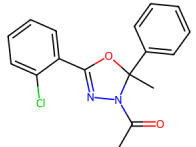   | 314.77 | 90 | 315 | 0 | 3 | 2 | 3.75 | 85  | 42 | 0.85 |
| 170 | P43490     |    | 329.39 | 95 | 329 | 2 | 4 | 6 | 3.13 | 91  | 76 | 0.85 |
| 171 | Q99538     |    | 357.47 | 97 | 357 | 3 | 3 | 3 | 2.88 | 102 | 84 | 0.73 |
| 172 | P28335     |   | 381.31 | 97 | 381 | 1 | 3 | 3 | 3.4  | 94  | 56 | 0.87 |
| 174 | A0A6L0XSJ0 |  | 370.50 | 90 | 370 | 1 | 5 | 5 | 1.45 | 102 | 82 | 0.8  |

|     |            |                                                                                     |        |     |     |   |   |   |      |     |     |      |
|-----|------------|-------------------------------------------------------------------------------------|--------|-----|-----|---|---|---|------|-----|-----|------|
| 176 | P0C0V0     | 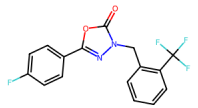   | 338.25 | 90  | 338 | 0 | 4 | 3 | 3.71 | 77  | 48  | 0.68 |
| 177 | Q9H9Z2     |    | 462.57 | 92  | 463 | 2 | 5 | 7 | 1.0  | 118 | 116 | 0.63 |
| 178 | Q9R1M7     |    | 376.33 | 100 | 376 | 0 | 5 | 3 | 3.7  | 92  | 61  | 0.65 |
| 180 | A0A1D3GEK4 |   | 471.54 | 90  | 472 | 1 | 5 | 5 | 5.01 | 132 | 86  | 0.53 |
| 181 | A0A066SSQ2 |  | 339.30 | 90  | 339 | 0 | 7 | 5 | 3.31 | 87  | 108 | 0.4  |

|     |        |                                                                                     |        |     |     |   |    |   |      |     |     |      |
|-----|--------|-------------------------------------------------------------------------------------|--------|-----|-----|---|----|---|------|-----|-----|------|
| 182 | Q13469 | 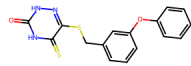   | 343.43 | 90  | 343 | 2 | 5  | 5 | 3.91 | 93  | 71  | 0.54 |
| 183 | P9WNS3 |    | 465.48 | 100 | 465 | 1 | 10 | 7 | 3.13 | 120 | 125 | 0.41 |
| 184 | Q2FD70 |    | 360.88 | 100 | 324 | 2 | 3  | 5 | 2.36 | 96  | 50  | 0.89 |
| 185 | P31224 |   | 345.87 | 94  | 309 | 2 | 3  | 3 | 3.34 | 92  | 46  | 0.91 |
| 186 | Q06330 |  | 347.48 | 100 | 347 | 0 | 6  | 4 | 5.31 | 93  | 47  | 0.6  |

|     |        |                                                                                     |        |     |     |   |   |   |      |     |     |      |
|-----|--------|-------------------------------------------------------------------------------------|--------|-----|-----|---|---|---|------|-----|-----|------|
| 187 | P61157 | 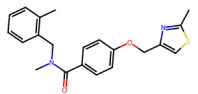   | 366.48 | 90  | 366 | 0 | 4 | 6 | 4.61 | 105 | 42  | 0.64 |
| 189 | Q15907 |    | 492.58 | 100 | 493 | 2 | 7 | 6 | 4.12 | 137 | 100 | 0.46 |
| 191 | P9WJY9 |    | 402.42 | 91  | 402 | 2 | 6 | 4 | 3.88 | 111 | 101 | 0.44 |
| 193 | O15392 |  | 351.36 | 100 | 351 | 0 | 6 | 5 | 3.57 | 98  | 86  | 0.4  |
| 194 | Q96D96 |  | 309.24 | 100 | 309 | 0 | 4 | 3 | 3.54 | 73  | 44  | 0.74 |

|     |        |                                                                                     |        |     |     |   |    |   |      |     |     |      |
|-----|--------|-------------------------------------------------------------------------------------|--------|-----|-----|---|----|---|------|-----|-----|------|
| 195 | P35340 |    | 303.27 | 90  | 303 | 1 | 6  | 6 | 1.93 | 78  | 121 | 0.64 |
| 196 | P52732 |    | 465.52 | 100 | 466 | 1 | 10 | 7 | 3.06 | 110 | 125 | 0.52 |
| 197 | P52333 |    | 322.36 | 100 | 322 | 3 | 4  | 3 | 2.4  | 93  | 100 | 0.69 |
| 198 | P47895 |   | 301.73 | 91  | 302 | 1 | 5  | 5 | 1.35 | 76  | 92  | 0.65 |
| 199 | P08631 |  | 316.36 | 98  | 316 | 1 | 4  | 3 | 3.42 | 94  | 58  | 0.8  |

|     |        |                                                                                     |        |     |     |   |   |   |      |     |     |      |
|-----|--------|-------------------------------------------------------------------------------------|--------|-----|-----|---|---|---|------|-----|-----|------|
| 201 | Q15796 | 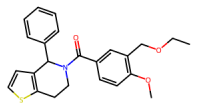   | 407.53 | 90  | 408 | 0 | 4 | 6 | 5.08 | 116 | 39  | 0.57 |
| 202 | P21796 |    | 369.21 | 94  | 369 | 1 | 3 | 4 | 4.89 | 93  | 51  | 0.71 |
| 203 | Q9LAU2 |    | 339.41 | 100 | 339 | 1 | 5 | 5 | 3.7  | 95  | 64  | 0.77 |
| 205 | K9WT99 |   | 359.40 | 95  | 359 | 0 | 7 | 4 | 3.88 | 91  | 61  | 0.55 |
| 208 | Q16822 |  | 433.50 | 100 | 434 | 1 | 8 | 7 | 4.04 | 107 | 111 | 0.56 |



|     |                |                                                                                     |        |     |     |   |   |   |      |     |    |      |
|-----|----------------|-------------------------------------------------------------------------------------|--------|-----|-----|---|---|---|------|-----|----|------|
| 209 | O35295         | 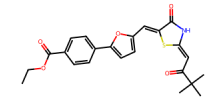   | 425.50 | 90  | 426 | 1 | 6 | 5 | 3.1  | 117 | 89 | 0.63 |
| 210 | Q32ZE1         |    | 378.41 | 90  | 378 | 1 | 7 | 6 | 4.02 | 101 | 90 | 0.54 |
| 211 | B0FLN1         |    | 412.21 | 90  | 412 | 1 | 4 | 4 | 4.9  | 98  | 75 | 0.66 |
| 212 | P61073         |   | 349.37 | 100 | 349 | 1 | 4 | 4 | 3.45 | 89  | 56 | 0.92 |
| 213 | P07949, Q62997 |  | 283.40 | 90  | 283 | 1 | 4 | 3 | 4.61 | 86  | 38 | 0.76 |

|     |        |                                                                                     |        |     |     |   |   |   |      |     |    |      |
|-----|--------|-------------------------------------------------------------------------------------|--------|-----|-----|---|---|---|------|-----|----|------|
| 214 | Q16186 | 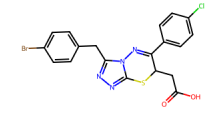   | 477.76 | 100 | 478 | 1 | 6 | 5 | 4.49 | 112 | 80 | 0.59 |
| 215 | P11498 |    | 399.47 | 91  | 399 | 1 | 8 | 8 | 2.78 | 104 | 99 | 0.58 |
| 216 | P9WMH1 |    | 296.36 | 100 | 296 | 1 | 3 | 5 | 1.41 | 77  | 49 | 0.89 |
| 217 | Q8NEB9 |   | 339.37 | 100 | 339 | 0 | 6 | 3 | 2.61 | 92  | 56 | 0.73 |
| 218 | P11474 |  | 273.37 | 99  | 273 | 0 | 4 | 3 | 4.55 | 77  | 22 | 0.7  |

|     |        |                                                                                     |        |     |     |   |   |   |      |     |     |      |
|-----|--------|-------------------------------------------------------------------------------------|--------|-----|-----|---|---|---|------|-----|-----|------|
| 219 | P03518 | 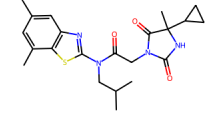   | 428.55 | 99  | 429 | 1 | 5 | 6 | 3.62 | 118 | 83  | 0.71 |
| 221 | P08134 |    | 281.78 | 90  | 282 | 1 | 4 | 3 | 3.97 | 73  | 42  | 0.74 |
| 222 | O15294 |    | 414.91 | 100 | 415 | 1 | 7 | 6 | 3.47 | 97  | 103 | 0.62 |
| 223 | O15554 |   | 318.48 | 90  | 318 | 0 | 3 | 3 | 4.23 | 91  | 33  | 0.84 |
| 224 | Q02127 |  | 347.33 | 99  | 347 | 0 | 3 | 3 | 4.09 | 87  | 57  | 0.84 |

|     |        |                                                                                     |        |     |     |   |   |   |      |     |    |      |
|-----|--------|-------------------------------------------------------------------------------------|--------|-----|-----|---|---|---|------|-----|----|------|
| 225 | Q5QD14 | 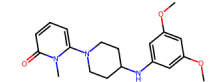   | 343.42 | 100 | 343 | 1 | 6 | 5 | 2.48 | 100 | 56 | 0.9  |
| 226 | Q76R61 |    | 349.84 | 96  | 350 | 1 | 6 | 5 | 3.82 | 90  | 64 | 0.71 |
| 227 | P0C8L0 |    | 393.45 | 91  | 393 | 0 | 3 | 7 | 3.44 | 98  | 47 | 0.72 |
| 228 | P07237 |   | 377.45 | 100 | 377 | 2 | 5 | 6 | 3.94 | 110 | 69 | 0.53 |
| 233 | Q5UB51 |  | 383.83 | 98  | 384 | 1 | 5 | 5 | 2.66 | 105 | 73 | 0.74 |

|     |        |                                                                                     |        |     |     |   |   |   |      |     |    |      |
|-----|--------|-------------------------------------------------------------------------------------|--------|-----|-----|---|---|---|------|-----|----|------|
| 235 | P13569 | 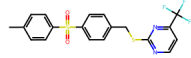   | 424.46 | 100 | 424 | 0 | 5 | 5 | 4.93 | 100 | 60 | 0.43 |
| 236 | Q8NBP7 |    | 421.32 | 97  | 421 | 0 | 3 | 5 | 3.42 | 103 | 58 | 0.69 |
| 237 | P09960 |    | 386.51 | 90  | 387 | 0 | 5 | 7 | 3.61 | 110 | 42 | 0.73 |
| 238 | Q99720 |   | 329.44 | 90  | 329 | 0 | 5 | 6 | 3.03 | 94  | 40 | 0.82 |
| 239 | P13945 |  | 328.38 | 90  | 328 | 1 | 3 | 3 | 3.05 | 90  | 44 | 0.94 |

|     |                |                                                                                     |        |     |     |   |   |   |      |    |    |      |
|-----|----------------|-------------------------------------------------------------------------------------|--------|-----|-----|---|---|---|------|----|----|------|
| 240 | P12883         | 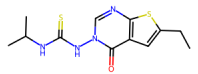   | 296.42 | 90  | 296 | 2 | 5 | 3 | 1.85 | 83 | 59 | 0.85 |
| 242 | Q16526         |    | 320.39 | 97  | 320 | 1 | 4 | 5 | 2.75 | 94 | 50 | 0.79 |
| 243 | O00522, Q9ULI3 |    | 345.80 | 90  | 346 | 1 | 3 | 3 | 4.01 | 92 | 67 | 0.73 |
| 245 | O55143         |   | 400.15 | 100 | 400 | 0 | 5 | 2 | 2.69 | 84 | 56 | 0.67 |
| 247 | P13501         |  | 321.28 | 97  | 321 | 2 | 4 | 5 | 2.34 | 79 | 80 | 0.89 |

|     |        |                                                                                     |        |     |     |   |   |   |      |     |     |      |
|-----|--------|-------------------------------------------------------------------------------------|--------|-----|-----|---|---|---|------|-----|-----|------|
| 248 | O00429 | 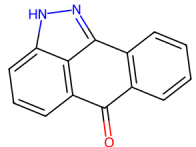   | 220.23 | 95  | 220 | 1 | 2 | 0 | 2.77 | 65  | 46  | 0.49 |
| 249 | Q99497 |    | 491.00 | 100 | 491 | 3 | 5 | 9 | 1.97 | 127 | 122 | 0.5  |
| 250 | Q15758 |    | 398.92 | 91  | 399 | 0 | 3 | 5 | 5.53 | 111 | 42  | 0.66 |
| 251 | Q16548 |   | 296.70 | 98  | 297 | 0 | 5 | 1 | 3.41 | 71  | 56  | 0.69 |
| 252 | Q92793 |  | 339.45 | 90  | 339 | 1 | 4 | 4 | 4.3  | 100 | 59  | 0.77 |

|     |        |                                                                                     |        |    |     |   |   |   |      |     |     |      |
|-----|--------|-------------------------------------------------------------------------------------|--------|----|-----|---|---|---|------|-----|-----|------|
| 253 | Q09427 | 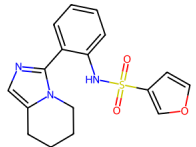   | 343.40 | 90 | 343 | 1 | 5 | 4 | 3.28 | 90  | 77  | 0.79 |
| 254 | O95786 |    | 499.53 | 92 | 500 | 1 | 9 | 6 | 2.08 | 128 | 123 | 0.48 |
| 255 | P16220 |    | 336.31 | 96 | 336 | 1 | 3 | 3 | 3.09 | 83  | 53  | 0.94 |
| 256 | A1Z1Q3 |   | 276.37 | 97 | 276 | 2 | 3 | 5 | 2.52 | 81  | 53  | 0.87 |
| 257 | Q814Y5 |  | 306.27 | 90 | 306 | 2 | 6 | 4 | 2.28 | 64  | 80  | 0.85 |



|     |                |                                                                                     |        |    |     |   |   |   |      |     |     |      |
|-----|----------------|-------------------------------------------------------------------------------------|--------|----|-----|---|---|---|------|-----|-----|------|
| 258 | O14924, O43566 | 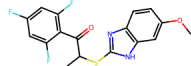   | 366.36 | 94 | 366 | 1 | 4 | 5 | 4.35 | 89  | 55  | 0.54 |
| 259 | A0QTK6         |    | 433.56 | 90 | 434 | 0 | 4 | 4 | 4.38 | 123 | 54  | 0.61 |
| 260 | C6TCZ5         |    | 375.24 | 90 | 375 | 1 | 4 | 4 | 4.26 | 90  | 63  | 0.74 |
| 261 | Q9Y251         |   | 358.39 | 90 | 358 | 1 | 4 | 4 | 5.06 | 105 | 64  | 0.55 |
| 262 | Q9H255         |  | 447.78 | 97 | 448 | 1 | 7 | 5 | 3.65 | 95  | 120 | 0.47 |

|     |        |                                                                                     |        |     |     |   |   |   |      |     |    |      |
|-----|--------|-------------------------------------------------------------------------------------|--------|-----|-----|---|---|---|------|-----|----|------|
| 263 | P06400 | 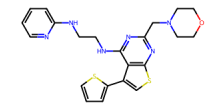   | 452.60 | 100 | 453 | 2 | 9 | 8 | 4.17 | 128 | 75 | 0.39 |
| 264 | Q04206 |    | 434.57 | 90  | 435 | 3 | 4 | 6 | 4.56 | 119 | 83 | 0.62 |
| 265 | P14778 |    | 312.81 | 90  | 313 | 1 | 2 | 4 | 3.33 | 83  | 32 | 0.92 |
| 267 | P0DTC2 |   | 440.97 | 100 | 441 | 1 | 6 | 7 | 5.06 | 119 | 60 | 0.41 |
| 268 | Q13255 |  | 295.44 | 90  | 295 | 0 | 2 | 2 | 3.55 | 82  | 37 | 0.84 |

|     |        |                                                                                     |        |    |     |   |   |   |      |     |    |      |
|-----|--------|-------------------------------------------------------------------------------------|--------|----|-----|---|---|---|------|-----|----|------|
| 269 | Q99986 | 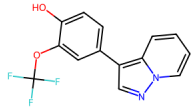   | 294.23 | 90 | 294 | 1 | 4 | 2 | 3.61 | 69  | 47 | 0.79 |
| 270 | P16885 |    | 393.45 | 90 | 393 | 2 | 3 | 3 | 3.59 | 113 | 65 | 0.71 |
| 271 | Q81Y81 |    | 293.43 | 90 | 293 | 0 | 4 | 3 | 2.4  | 81  | 36 | 0.86 |
| 273 | Q8WTS1 |  | 428.55 | 90 | 429 | 1 | 4 | 7 | 3.6  | 116 | 76 | 0.73 |
| 274 | Q14498 |  | 369.72 | 90 | 370 | 1 | 3 | 5 | 4.02 | 75  | 55 | 0.81 |

|     |            |                                                                                     |        |     |     |   |   |   |      |     |     |      |
|-----|------------|-------------------------------------------------------------------------------------|--------|-----|-----|---|---|---|------|-----|-----|------|
| 276 | Q8N9F0     | 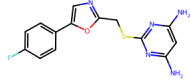   | 317.34 | 98  | 317 | 2 | 7 | 4 | 2.73 | 82  | 104 | 0.56 |
| 278 | P0A1S2     |    | 447.34 | 100 | 447 | 0 | 5 | 5 | 4.09 | 111 | 51  | 0.69 |
| 279 | P9WG83     |    | 328.36 | 100 | 328 | 1 | 5 | 4 | 1.14 | 89  | 79  | 0.91 |
| 280 | A0A0H3JDV8 |   | 278.71 | 90  | 279 | 0 | 5 | 1 | 3.27 | 71  | 56  | 0.69 |
| 283 | P14222     |  | 280.29 | 98  | 280 | 1 | 2 | 5 | 4.19 | 72  | 25  | 0.89 |

|     |                |                                                                                     |        |     |     |   |   |   |      |    |     |      |
|-----|----------------|-------------------------------------------------------------------------------------|--------|-----|-----|---|---|---|------|----|-----|------|
| 285 | Q92835         | 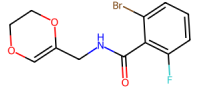   | 316.12 | 90  | 316 | 1 | 3 | 3 | 2.21 | 66 | 48  | 0.93 |
| 286 | Q9H008         |    | 395.48 | 90  | 335 | 1 | 4 | 3 | 0.36 | 87 | 70  | 0.81 |
| 287 | Q13501         |    | 292.31 | 100 | 292 | 2 | 6 | 3 | 0.75 | 73 | 107 | 0.87 |
| 288 | P37231         |  | 362.28 | 90  | 362 | 1 | 5 | 5 | 4.55 | 82 | 38  | 0.79 |
| 289 | P25787, P25789 |  | 302.78 | 90  | 303 | 1 | 4 | 2 | 3.95 | 82 | 46  | 0.73 |

|     |        |                                                                                     |        |     |     |   |   |   |      |     |    |      |
|-----|--------|-------------------------------------------------------------------------------------|--------|-----|-----|---|---|---|------|-----|----|------|
| 291 | P04062 | 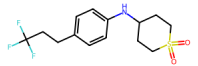   | 321.36 | 100 | 321 | 1 | 3 | 4 | 3.17 | 76  | 46 | 0.93 |
| 292 | P10265 |    | 455.62 | 90  | 451 | 1 | 4 | 4 | 4.48 | 121 | 76 | 0.7  |
| 293 | P22830 |    | 376.45 | 90  | 376 | 0 | 5 | 7 | 3.7  | 108 | 68 | 0.59 |
| 294 | P18887 |   | 389.23 | 94  | 389 | 0 | 5 | 4 | 4.2  | 100 | 61 | 0.63 |
| 295 | O95833 |  | 349.28 | 98  | 349 | 1 | 5 | 3 | 2.77 | 83  | 74 | 0.86 |

|     |        |                                                                                   |        |    |     |   |   |   |      |     |    |      |
|-----|--------|-----------------------------------------------------------------------------------|--------|----|-----|---|---|---|------|-----|----|------|
| 296 | Q8NBP7 | 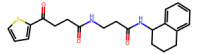 | 384.49 | 96 | 385 | 2 | 4 | 8 | 3.41 | 106 | 75 | 0.69 |
|-----|--------|-----------------------------------------------------------------------------------|--------|----|-----|---|---|---|------|-----|----|------|

**Supplementary Table 4.** Structures of representative bioactive compounds along with their QC data and calculated physical properties from each of the 215 projects with at least one discovered bioactive compound. All compounds reported in this study are off-the-self catalog compounds. The Mass and Purity values are reported from the purchase order received from the supplier, and account for salts if applicable. Values not received from the supplier are indicated by a '-' sign. The number of hydrogen bond donors (HBD), number of hydrogen bond acceptors (HBA), number of rotational bonds (Rot), calculated logP (cLogP), molecular refractivity (MR), topological polar surface area (TPSA), and quantitative estimation of drug-likeness (QED<sup>19</sup>), were calculated using RDkit<sup>20</sup>.

| Project Number | UniProt ID | Research Area              | # of SD hits | # of DR hits | Potency Range ( $\mu\text{M}$ ) | Units |
|----------------|------------|----------------------------|--------------|--------------|---------------------------------|-------|
| 017            | Q92743     | Other                      | 8            | 0            | -                               | -     |
| 044            | P28223     | Infectious Diseases        | 7            | 3            | 0.5306 - 1.574                  | IC50  |
| 046            | P18031     | Endocrinology & Metabolism | 13           | 3            | 0.2665 - 42.29                  | Kd    |
| 049            | P50148     | Immunology                 | 1            | 1            | 55.2                            | IC50  |
| 050            | O00308     | Oncology                   | 2            | 0            | -                               | -     |
| 053            | P55072     | Other                      | 15           | 2            | 1.186 - 2.176                   | IC50  |
| 093            | Q16740     | Oncology                   | 4            | 0            | -                               | -     |
| 094            | P9WKI7     | Infectious Diseases        | 7            | 1            | 22.1                            | IC50  |
| 103            | B1LMQ5     | Infectious Diseases        | 7            | 0            | -                               | -     |
| 104            | P15056     | Oncology                   | 2            | 2            | 2.297 - 118.2                   | IC50  |
| 120            | P05121     | Rare diseases & Disorders  | 13           | 8            | 21.33 - 865.7                   | IC50  |
| 135            | P55072     | Oncology                   | 14           | 7            | 5.731 - 428.4                   | IC50  |
| 142            | P12931     | Oncology                   | 5            | 3            | 0.401 - 75.85                   | EC50  |
| 143            | P0A031     | Infectious Diseases        | 10           | 2            | 2.21 - 31.55                    | IC50  |



|     |            |                        |    |   |               |               |
|-----|------------|------------------------|----|---|---------------|---------------|
| 144 | P34913     | Other                  | 6  | 4 | 0.004 - 0.642 | IC50          |
| 148 | Q15717     | Neurology              | 1  | 1 | 51.14         | IC50          |
| 151 | O15554     | Immunology             | 2  | 1 | 5.766         | IC50,<br>EC50 |
| 153 | P55851     | Oncology               | 5  | 1 | 993.1         | IC50          |
| 155 | Q9YLJ3     | Infectious<br>Diseases | 2  | 0 | -             | -             |
| 163 | P0DTD1     | Infectious<br>Diseases | 11 | 7 | 21.31 - 44.06 | IC50          |
| 169 | P52270     | Infectious<br>Diseases | 20 | 8 | 12.2 - 34.54  | IC50          |
| 174 | A0A6L0XSJ0 | Infectious<br>Diseases | 8  | 5 | 0.08519 -17.5 | IC50          |
| 178 | Q9R1M7     | Neurology              | 17 | 8 | 3.077 - 18.99 | IC50          |
| 182 | Q13469     | Immunology             | 8  | 1 | 0.58          | IC50          |
| 183 | P9WNS3     | Infectious<br>Diseases | 5  | 1 | 195.6         | IC50          |
| 186 | Q06330     | Oncology               | 7  | 3 | 1.657 - 22.71 | IC50          |
| 189 | Q15907     | Other                  | 3  | 0 | -             | -             |
| 191 | P9WJY9     | Infectious<br>Diseases | 12 | 3 | 25.64 - 51.42 | IC50          |
| 196 | P52732     | Oncology               | 2  | 0 | -             | -             |
| 197 | P52333     | Immunology             | 2  | 2 | 36.98 - 69.76 | IC50          |

|     |               |                           |    |   |                 |      |
|-----|---------------|---------------------------|----|---|-----------------|------|
| 198 | P47895        | Oncology                  | 4  | 4 | 19.25 - 190.5   | IC50 |
| 199 | P08631        | Oncology                  | 3  | 3 | 0.2554 - 0.6474 | IC50 |
| 205 | K9WT99        | Oncology                  | 1  | 2 | 0.9516 - 5.01   | IC50 |
| 209 | O35295        | Oncology                  | 1  | 1 | 2.78            | IC50 |
| 219 | P03518        | Infectious Diseases       | 3  | 0 | -               | -    |
| 228 | P07237        | Cardio-vascular diseases  | 1  | 1 | 3.59            | IC50 |
| 235 | P13569        | Rare diseases & Disorders | 9  | 9 | 0.1715 - 16.56  | IC50 |
| 237 | P09960        | Immunology                | 9  | 9 | 1.229 - 33.57   | IC50 |
| 240 | P12883        | Cardio-vascular diseases  | 1  | 1 | 20.87           | IC50 |
| 242 | Q16526        | Other                     | 6  | 2 | 122.2           | IC50 |
| 243 | O00522,Q9ULI3 | Cardio-vascular diseases  | 2  | 1 | 862.5           | IC50 |
| 248 | O00429        | Neurology                 | 6  | 1 | 261.6           | Kd   |
| 251 | Q16548        | Immunology                | 35 | 2 | 117.2 - 217.4   | IC50 |
| 255 | P16220        | Oncology                  | 5  | 2 | 1.014 - 14.26   | IC50 |
| 258 | O14924,O43566 | Neurology                 | 3  | 1 | 64.17           | IC50 |
| 261 | Q9Y251        | Oncology                  | 5  | 4 | 44.96 - 220.9   | IC50 |

|     |        |          |    |   |                 |      |
|-----|--------|----------|----|---|-----------------|------|
| 262 | Q9H255 | Oncology | 10 | 7 | 0.01797 - 81.72 | IC50 |
| 264 | Q04206 | Oncology | 7  | 3 | 0.8557 - 2.982  | IC50 |
| 273 | Q8WTS1 | Other    | 6  | 6 | 6.4965 - 46.985 | IC50 |

---

**Supplementary Table 5.** Dose-response results for 49 AIMS projects in the AIMS-validation follow up studies. In the AIMS-validation dose-response (DR) studies we attempted to reproduce the primary single-dose (SD) hits and follow up with DR measurements, using the same assay at the same academic lab.

| Project Number | UniProt ID | Structure                                                                          | IC <sub>50</sub> | Hill Slope | R <sup>2</sup> | Dose-response curve                                                                  |
|----------------|------------|------------------------------------------------------------------------------------|------------------|------------|----------------|--------------------------------------------------------------------------------------|
| 044            | P28223     | 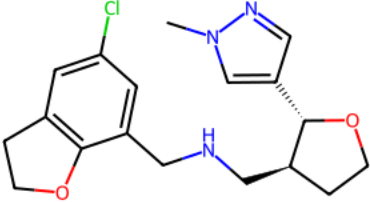  | 1.574            | 1.971      | 0.9965         |   |
| 046            | P18031     |  | 42.29*           | -          | 0.7915         |  |

|     |        |                                                                                   |       |        |        |                                                                                      |
|-----|--------|-----------------------------------------------------------------------------------|-------|--------|--------|--------------------------------------------------------------------------------------|
| 049 | P50148 | 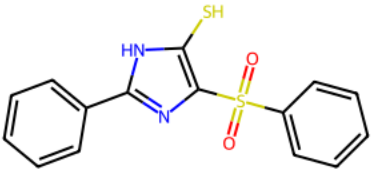 | 55.2  | -1.77  | 0.9945 |   |
| 053 | P55072 |  | 1.186 | -1.563 | 0.8988 |  |

| 094                | P9WK17       | 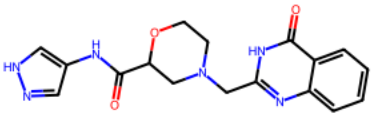 | 22.1  | -0.956 | 0.9994 |  <table border="1"> <caption>Approximate data points for P9WK17</caption> <thead> <tr> <th>Concentration (µM)</th> <th>Assay Signal</th> </tr> </thead> <tbody> <tr><td>0.01</td><td>100</td></tr> <tr><td>0.02</td><td>100</td></tr> <tr><td>0.05</td><td>100</td></tr> <tr><td>0.1</td><td>100</td></tr> <tr><td>0.2</td><td>100</td></tr> <tr><td>0.5</td><td>95</td></tr> <tr><td>1</td><td>85</td></tr> <tr><td>2</td><td>75</td></tr> <tr><td>5</td><td>60</td></tr> <tr><td>10</td><td>45</td></tr> <tr><td>20</td><td>30</td></tr> <tr><td>50</td><td>15</td></tr> </tbody> </table> | Concentration (µM) | Assay Signal | 0.01  | 100 | 0.02  | 100 | 0.05  | 100 | 0.1  | 100 | 0.2  | 100 | 0.5  | 95 | 1   | 85 | 2   | 75 | 5   | 60 | 10 | 45 | 20 | 30 | 50 | 15 |
|--------------------|--------------|-----------------------------------------------------------------------------------|-------|--------|--------|---------------------------------------------------------------------------------------------------------------------------------------------------------------------------------------------------------------------------------------------------------------------------------------------------------------------------------------------------------------------------------------------------------------------------------------------------------------------------------------------------------------------------------------------------------------------------------------------------------------------------------------------------------------------------------|--------------------|--------------|-------|-----|-------|-----|-------|-----|------|-----|------|-----|------|----|-----|----|-----|----|-----|----|----|----|----|----|----|----|
| Concentration (µM) | Assay Signal |                                                                                   |       |        |        |                                                                                                                                                                                                                                                                                                                                                                                                                                                                                                                                                                                                                                                                                 |                    |              |       |     |       |     |       |     |      |     |      |     |      |    |     |    |     |    |     |    |    |    |    |    |    |    |
| 0.01               | 100          |                                                                                   |       |        |        |                                                                                                                                                                                                                                                                                                                                                                                                                                                                                                                                                                                                                                                                                 |                    |              |       |     |       |     |       |     |      |     |      |     |      |    |     |    |     |    |     |    |    |    |    |    |    |    |
| 0.02               | 100          |                                                                                   |       |        |        |                                                                                                                                                                                                                                                                                                                                                                                                                                                                                                                                                                                                                                                                                 |                    |              |       |     |       |     |       |     |      |     |      |     |      |    |     |    |     |    |     |    |    |    |    |    |    |    |
| 0.05               | 100          |                                                                                   |       |        |        |                                                                                                                                                                                                                                                                                                                                                                                                                                                                                                                                                                                                                                                                                 |                    |              |       |     |       |     |       |     |      |     |      |     |      |    |     |    |     |    |     |    |    |    |    |    |    |    |
| 0.1                | 100          |                                                                                   |       |        |        |                                                                                                                                                                                                                                                                                                                                                                                                                                                                                                                                                                                                                                                                                 |                    |              |       |     |       |     |       |     |      |     |      |     |      |    |     |    |     |    |     |    |    |    |    |    |    |    |
| 0.2                | 100          |                                                                                   |       |        |        |                                                                                                                                                                                                                                                                                                                                                                                                                                                                                                                                                                                                                                                                                 |                    |              |       |     |       |     |       |     |      |     |      |     |      |    |     |    |     |    |     |    |    |    |    |    |    |    |
| 0.5                | 95           |                                                                                   |       |        |        |                                                                                                                                                                                                                                                                                                                                                                                                                                                                                                                                                                                                                                                                                 |                    |              |       |     |       |     |       |     |      |     |      |     |      |    |     |    |     |    |     |    |    |    |    |    |    |    |
| 1                  | 85           |                                                                                   |       |        |        |                                                                                                                                                                                                                                                                                                                                                                                                                                                                                                                                                                                                                                                                                 |                    |              |       |     |       |     |       |     |      |     |      |     |      |    |     |    |     |    |     |    |    |    |    |    |    |    |
| 2                  | 75           |                                                                                   |       |        |        |                                                                                                                                                                                                                                                                                                                                                                                                                                                                                                                                                                                                                                                                                 |                    |              |       |     |       |     |       |     |      |     |      |     |      |    |     |    |     |    |     |    |    |    |    |    |    |    |
| 5                  | 60           |                                                                                   |       |        |        |                                                                                                                                                                                                                                                                                                                                                                                                                                                                                                                                                                                                                                                                                 |                    |              |       |     |       |     |       |     |      |     |      |     |      |    |     |    |     |    |     |    |    |    |    |    |    |    |
| 10                 | 45           |                                                                                   |       |        |        |                                                                                                                                                                                                                                                                                                                                                                                                                                                                                                                                                                                                                                                                                 |                    |              |       |     |       |     |       |     |      |     |      |     |      |    |     |    |     |    |     |    |    |    |    |    |    |    |
| 20                 | 30           |                                                                                   |       |        |        |                                                                                                                                                                                                                                                                                                                                                                                                                                                                                                                                                                                                                                                                                 |                    |              |       |     |       |     |       |     |      |     |      |     |      |    |     |    |     |    |     |    |    |    |    |    |    |    |
| 50                 | 15           |                                                                                   |       |        |        |                                                                                                                                                                                                                                                                                                                                                                                                                                                                                                                                                                                                                                                                                 |                    |              |       |     |       |     |       |     |      |     |      |     |      |    |     |    |     |    |     |    |    |    |    |    |    |    |
| 104                | P15056       |  | 2.297 | 0.8474 | 0.9979 |  <table border="1"> <caption>Approximate data points for P15056</caption> <thead> <tr> <th>Concentration (µM)</th> <th>Assay Signal</th> </tr> </thead> <tbody> <tr><td>0.001</td><td>0</td></tr> <tr><td>0.002</td><td>1</td></tr> <tr><td>0.005</td><td>2</td></tr> <tr><td>0.01</td><td>3</td></tr> <tr><td>0.02</td><td>4</td></tr> <tr><td>0.05</td><td>6</td></tr> <tr><td>0.1</td><td>10</td></tr> <tr><td>0.2</td><td>15</td></tr> <tr><td>0.5</td><td>25</td></tr> <tr><td>1</td><td>40</td></tr> <tr><td>2</td><td>65</td></tr> <tr><td>5</td><td>85</td></tr> </tbody> </table>  | Concentration (µM) | Assay Signal | 0.001 | 0   | 0.002 | 1   | 0.005 | 2   | 0.01 | 3   | 0.02 | 4   | 0.05 | 6  | 0.1 | 10 | 0.2 | 15 | 0.5 | 25 | 1  | 40 | 2  | 65 | 5  | 85 |
| Concentration (µM) | Assay Signal |                                                                                   |       |        |        |                                                                                                                                                                                                                                                                                                                                                                                                                                                                                                                                                                                                                                                                                 |                    |              |       |     |       |     |       |     |      |     |      |     |      |    |     |    |     |    |     |    |    |    |    |    |    |    |
| 0.001              | 0            |                                                                                   |       |        |        |                                                                                                                                                                                                                                                                                                                                                                                                                                                                                                                                                                                                                                                                                 |                    |              |       |     |       |     |       |     |      |     |      |     |      |    |     |    |     |    |     |    |    |    |    |    |    |    |
| 0.002              | 1            |                                                                                   |       |        |        |                                                                                                                                                                                                                                                                                                                                                                                                                                                                                                                                                                                                                                                                                 |                    |              |       |     |       |     |       |     |      |     |      |     |      |    |     |    |     |    |     |    |    |    |    |    |    |    |
| 0.005              | 2            |                                                                                   |       |        |        |                                                                                                                                                                                                                                                                                                                                                                                                                                                                                                                                                                                                                                                                                 |                    |              |       |     |       |     |       |     |      |     |      |     |      |    |     |    |     |    |     |    |    |    |    |    |    |    |
| 0.01               | 3            |                                                                                   |       |        |        |                                                                                                                                                                                                                                                                                                                                                                                                                                                                                                                                                                                                                                                                                 |                    |              |       |     |       |     |       |     |      |     |      |     |      |    |     |    |     |    |     |    |    |    |    |    |    |    |
| 0.02               | 4            |                                                                                   |       |        |        |                                                                                                                                                                                                                                                                                                                                                                                                                                                                                                                                                                                                                                                                                 |                    |              |       |     |       |     |       |     |      |     |      |     |      |    |     |    |     |    |     |    |    |    |    |    |    |    |
| 0.05               | 6            |                                                                                   |       |        |        |                                                                                                                                                                                                                                                                                                                                                                                                                                                                                                                                                                                                                                                                                 |                    |              |       |     |       |     |       |     |      |     |      |     |      |    |     |    |     |    |     |    |    |    |    |    |    |    |
| 0.1                | 10           |                                                                                   |       |        |        |                                                                                                                                                                                                                                                                                                                                                                                                                                                                                                                                                                                                                                                                                 |                    |              |       |     |       |     |       |     |      |     |      |     |      |    |     |    |     |    |     |    |    |    |    |    |    |    |
| 0.2                | 15           |                                                                                   |       |        |        |                                                                                                                                                                                                                                                                                                                                                                                                                                                                                                                                                                                                                                                                                 |                    |              |       |     |       |     |       |     |      |     |      |     |      |    |     |    |     |    |     |    |    |    |    |    |    |    |
| 0.5                | 25           |                                                                                   |       |        |        |                                                                                                                                                                                                                                                                                                                                                                                                                                                                                                                                                                                                                                                                                 |                    |              |       |     |       |     |       |     |      |     |      |     |      |    |     |    |     |    |     |    |    |    |    |    |    |    |
| 1                  | 40           |                                                                                   |       |        |        |                                                                                                                                                                                                                                                                                                                                                                                                                                                                                                                                                                                                                                                                                 |                    |              |       |     |       |     |       |     |      |     |      |     |      |    |     |    |     |    |     |    |    |    |    |    |    |    |
| 2                  | 65           |                                                                                   |       |        |        |                                                                                                                                                                                                                                                                                                                                                                                                                                                                                                                                                                                                                                                                                 |                    |              |       |     |       |     |       |     |      |     |      |     |      |    |     |    |     |    |     |    |    |    |    |    |    |    |
| 5                  | 85           |                                                                                   |       |        |        |                                                                                                                                                                                                                                                                                                                                                                                                                                                                                                                                                                                                                                                                                 |                    |              |       |     |       |     |       |     |      |     |      |     |      |    |     |    |     |    |     |    |    |    |    |    |    |    |

| 120                | P05121       | 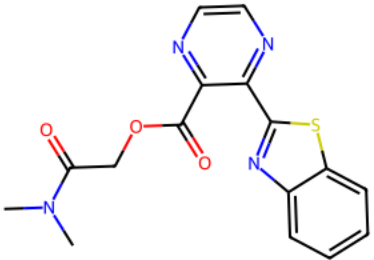  | 198.5 | -1.082 | 0.9325 |  <table border="1" data-bbox="1461 224 1835 602"> <caption>Approximate data points for P05121</caption> <thead> <tr> <th>Concentration (µM)</th> <th>Assay Signal</th> </tr> </thead> <tbody> <tr><td>0.5</td><td>95</td></tr> <tr><td>1</td><td>98</td></tr> <tr><td>2</td><td>100</td></tr> <tr><td>5</td><td>98</td></tr> <tr><td>10</td><td>95</td></tr> <tr><td>20</td><td>98</td></tr> <tr><td>50</td><td>70</td></tr> <tr><td>100</td><td>55</td></tr> <tr><td>200</td><td>40</td></tr> <tr><td>500</td><td>30</td></tr> </tbody> </table>                                                                                                                                                                         | Concentration (µM) | Assay Signal | 0.5 | 95  | 1   | 98  | 2   | 100 | 5 | 98 | 10 | 95 | 20 | 98 | 50 | 70 | 100 | 55 | 200 | 40 | 500 | 30 |     |    |     |    |      |   |      |   |      |   |
|--------------------|--------------|------------------------------------------------------------------------------------|-------|--------|--------|--------------------------------------------------------------------------------------------------------------------------------------------------------------------------------------------------------------------------------------------------------------------------------------------------------------------------------------------------------------------------------------------------------------------------------------------------------------------------------------------------------------------------------------------------------------------------------------------------------------------------------------------------------------------------------------------------------------------------------------------------------------------------------------------------------------|--------------------|--------------|-----|-----|-----|-----|-----|-----|---|----|----|----|----|----|----|----|-----|----|-----|----|-----|----|-----|----|-----|----|------|---|------|---|------|---|
| Concentration (µM) | Assay Signal |                                                                                    |       |        |        |                                                                                                                                                                                                                                                                                                                                                                                                                                                                                                                                                                                                                                                                                                                                                                                                              |                    |              |     |     |     |     |     |     |   |    |    |    |    |    |    |    |     |    |     |    |     |    |     |    |     |    |      |   |      |   |      |   |
| 0.5                | 95           |                                                                                    |       |        |        |                                                                                                                                                                                                                                                                                                                                                                                                                                                                                                                                                                                                                                                                                                                                                                                                              |                    |              |     |     |     |     |     |     |   |    |    |    |    |    |    |    |     |    |     |    |     |    |     |    |     |    |      |   |      |   |      |   |
| 1                  | 98           |                                                                                    |       |        |        |                                                                                                                                                                                                                                                                                                                                                                                                                                                                                                                                                                                                                                                                                                                                                                                                              |                    |              |     |     |     |     |     |     |   |    |    |    |    |    |    |    |     |    |     |    |     |    |     |    |     |    |      |   |      |   |      |   |
| 2                  | 100          |                                                                                    |       |        |        |                                                                                                                                                                                                                                                                                                                                                                                                                                                                                                                                                                                                                                                                                                                                                                                                              |                    |              |     |     |     |     |     |     |   |    |    |    |    |    |    |    |     |    |     |    |     |    |     |    |     |    |      |   |      |   |      |   |
| 5                  | 98           |                                                                                    |       |        |        |                                                                                                                                                                                                                                                                                                                                                                                                                                                                                                                                                                                                                                                                                                                                                                                                              |                    |              |     |     |     |     |     |     |   |    |    |    |    |    |    |    |     |    |     |    |     |    |     |    |     |    |      |   |      |   |      |   |
| 10                 | 95           |                                                                                    |       |        |        |                                                                                                                                                                                                                                                                                                                                                                                                                                                                                                                                                                                                                                                                                                                                                                                                              |                    |              |     |     |     |     |     |     |   |    |    |    |    |    |    |    |     |    |     |    |     |    |     |    |     |    |      |   |      |   |      |   |
| 20                 | 98           |                                                                                    |       |        |        |                                                                                                                                                                                                                                                                                                                                                                                                                                                                                                                                                                                                                                                                                                                                                                                                              |                    |              |     |     |     |     |     |     |   |    |    |    |    |    |    |    |     |    |     |    |     |    |     |    |     |    |      |   |      |   |      |   |
| 50                 | 70           |                                                                                    |       |        |        |                                                                                                                                                                                                                                                                                                                                                                                                                                                                                                                                                                                                                                                                                                                                                                                                              |                    |              |     |     |     |     |     |     |   |    |    |    |    |    |    |    |     |    |     |    |     |    |     |    |     |    |      |   |      |   |      |   |
| 100                | 55           |                                                                                    |       |        |        |                                                                                                                                                                                                                                                                                                                                                                                                                                                                                                                                                                                                                                                                                                                                                                                                              |                    |              |     |     |     |     |     |     |   |    |    |    |    |    |    |    |     |    |     |    |     |    |     |    |     |    |      |   |      |   |      |   |
| 200                | 40           |                                                                                    |       |        |        |                                                                                                                                                                                                                                                                                                                                                                                                                                                                                                                                                                                                                                                                                                                                                                                                              |                    |              |     |     |     |     |     |     |   |    |    |    |    |    |    |    |     |    |     |    |     |    |     |    |     |    |      |   |      |   |      |   |
| 500                | 30           |                                                                                    |       |        |        |                                                                                                                                                                                                                                                                                                                                                                                                                                                                                                                                                                                                                                                                                                                                                                                                              |                    |              |     |     |     |     |     |     |   |    |    |    |    |    |    |    |     |    |     |    |     |    |     |    |     |    |      |   |      |   |      |   |
| 135                | P55072       |  | 67.17 | -1.065 | 0.9921 |  <table border="1" data-bbox="1461 667 1835 1045"> <caption>Approximate data points for P55072</caption> <thead> <tr> <th>Concentration (µM)</th> <th>Assay Signal</th> </tr> </thead> <tbody> <tr><td>0.1</td><td>105</td></tr> <tr><td>0.2</td><td>100</td></tr> <tr><td>0.5</td><td>95</td></tr> <tr><td>1</td><td>98</td></tr> <tr><td>2</td><td>95</td></tr> <tr><td>5</td><td>98</td></tr> <tr><td>10</td><td>95</td></tr> <tr><td>20</td><td>85</td></tr> <tr><td>50</td><td>60</td></tr> <tr><td>100</td><td>40</td></tr> <tr><td>200</td><td>20</td></tr> <tr><td>500</td><td>10</td></tr> <tr><td>1000</td><td>5</td></tr> <tr><td>2000</td><td>2</td></tr> <tr><td>5000</td><td>1</td></tr> </tbody> </table> | Concentration (µM) | Assay Signal | 0.1 | 105 | 0.2 | 100 | 0.5 | 95  | 1 | 98 | 2  | 95 | 5  | 98 | 10 | 95 | 20  | 85 | 50  | 60 | 100 | 40 | 200 | 20 | 500 | 10 | 1000 | 5 | 2000 | 2 | 5000 | 1 |
| Concentration (µM) | Assay Signal |                                                                                    |       |        |        |                                                                                                                                                                                                                                                                                                                                                                                                                                                                                                                                                                                                                                                                                                                                                                                                              |                    |              |     |     |     |     |     |     |   |    |    |    |    |    |    |    |     |    |     |    |     |    |     |    |     |    |      |   |      |   |      |   |
| 0.1                | 105          |                                                                                    |       |        |        |                                                                                                                                                                                                                                                                                                                                                                                                                                                                                                                                                                                                                                                                                                                                                                                                              |                    |              |     |     |     |     |     |     |   |    |    |    |    |    |    |    |     |    |     |    |     |    |     |    |     |    |      |   |      |   |      |   |
| 0.2                | 100          |                                                                                    |       |        |        |                                                                                                                                                                                                                                                                                                                                                                                                                                                                                                                                                                                                                                                                                                                                                                                                              |                    |              |     |     |     |     |     |     |   |    |    |    |    |    |    |    |     |    |     |    |     |    |     |    |     |    |      |   |      |   |      |   |
| 0.5                | 95           |                                                                                    |       |        |        |                                                                                                                                                                                                                                                                                                                                                                                                                                                                                                                                                                                                                                                                                                                                                                                                              |                    |              |     |     |     |     |     |     |   |    |    |    |    |    |    |    |     |    |     |    |     |    |     |    |     |    |      |   |      |   |      |   |
| 1                  | 98           |                                                                                    |       |        |        |                                                                                                                                                                                                                                                                                                                                                                                                                                                                                                                                                                                                                                                                                                                                                                                                              |                    |              |     |     |     |     |     |     |   |    |    |    |    |    |    |    |     |    |     |    |     |    |     |    |     |    |      |   |      |   |      |   |
| 2                  | 95           |                                                                                    |       |        |        |                                                                                                                                                                                                                                                                                                                                                                                                                                                                                                                                                                                                                                                                                                                                                                                                              |                    |              |     |     |     |     |     |     |   |    |    |    |    |    |    |    |     |    |     |    |     |    |     |    |     |    |      |   |      |   |      |   |
| 5                  | 98           |                                                                                    |       |        |        |                                                                                                                                                                                                                                                                                                                                                                                                                                                                                                                                                                                                                                                                                                                                                                                                              |                    |              |     |     |     |     |     |     |   |    |    |    |    |    |    |    |     |    |     |    |     |    |     |    |     |    |      |   |      |   |      |   |
| 10                 | 95           |                                                                                    |       |        |        |                                                                                                                                                                                                                                                                                                                                                                                                                                                                                                                                                                                                                                                                                                                                                                                                              |                    |              |     |     |     |     |     |     |   |    |    |    |    |    |    |    |     |    |     |    |     |    |     |    |     |    |      |   |      |   |      |   |
| 20                 | 85           |                                                                                    |       |        |        |                                                                                                                                                                                                                                                                                                                                                                                                                                                                                                                                                                                                                                                                                                                                                                                                              |                    |              |     |     |     |     |     |     |   |    |    |    |    |    |    |    |     |    |     |    |     |    |     |    |     |    |      |   |      |   |      |   |
| 50                 | 60           |                                                                                    |       |        |        |                                                                                                                                                                                                                                                                                                                                                                                                                                                                                                                                                                                                                                                                                                                                                                                                              |                    |              |     |     |     |     |     |     |   |    |    |    |    |    |    |    |     |    |     |    |     |    |     |    |     |    |      |   |      |   |      |   |
| 100                | 40           |                                                                                    |       |        |        |                                                                                                                                                                                                                                                                                                                                                                                                                                                                                                                                                                                                                                                                                                                                                                                                              |                    |              |     |     |     |     |     |     |   |    |    |    |    |    |    |    |     |    |     |    |     |    |     |    |     |    |      |   |      |   |      |   |
| 200                | 20           |                                                                                    |       |        |        |                                                                                                                                                                                                                                                                                                                                                                                                                                                                                                                                                                                                                                                                                                                                                                                                              |                    |              |     |     |     |     |     |     |   |    |    |    |    |    |    |    |     |    |     |    |     |    |     |    |     |    |      |   |      |   |      |   |
| 500                | 10           |                                                                                    |       |        |        |                                                                                                                                                                                                                                                                                                                                                                                                                                                                                                                                                                                                                                                                                                                                                                                                              |                    |              |     |     |     |     |     |     |   |    |    |    |    |    |    |    |     |    |     |    |     |    |     |    |     |    |      |   |      |   |      |   |
| 1000               | 5            |                                                                                    |       |        |        |                                                                                                                                                                                                                                                                                                                                                                                                                                                                                                                                                                                                                                                                                                                                                                                                              |                    |              |     |     |     |     |     |     |   |    |    |    |    |    |    |    |     |    |     |    |     |    |     |    |     |    |      |   |      |   |      |   |
| 2000               | 2            |                                                                                    |       |        |        |                                                                                                                                                                                                                                                                                                                                                                                                                                                                                                                                                                                                                                                                                                                                                                                                              |                    |              |     |     |     |     |     |     |   |    |    |    |    |    |    |    |     |    |     |    |     |    |     |    |     |    |      |   |      |   |      |   |
| 5000               | 1            |                                                                                    |       |        |        |                                                                                                                                                                                                                                                                                                                                                                                                                                                                                                                                                                                                                                                                                                                                                                                                              |                    |              |     |     |     |     |     |     |   |    |    |    |    |    |    |    |     |    |     |    |     |    |     |    |     |    |      |   |      |   |      |   |

|     |        |                                                                                    |       |        |        |                                                                                      |
|-----|--------|------------------------------------------------------------------------------------|-------|--------|--------|--------------------------------------------------------------------------------------|
| 142 | P12931 | 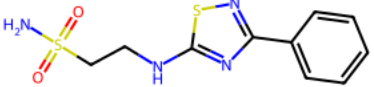  | 0.401 | -1.042 | 0.9897 |   |
| 143 | P0A031 |  | 2.21  | -3.475 | 0.9862 |  |



| 144                | P34913       | 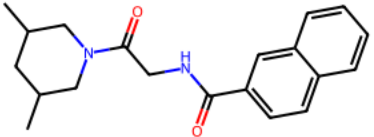 | 0.037 | 0.9207 | 0.9809 |  <table border="1"> <caption>Approximate data points for P34913</caption> <thead> <tr> <th>Concentration (µM)</th> <th>Assay Signal</th> </tr> </thead> <tbody> <tr><td>0.005</td><td>5</td></tr> <tr><td>0.01</td><td>10</td></tr> <tr><td>0.02</td><td>25</td></tr> <tr><td>0.05</td><td>40</td></tr> <tr><td>0.1</td><td>55</td></tr> <tr><td>0.2</td><td>70</td></tr> <tr><td>0.5</td><td>80</td></tr> </tbody> </table> | Concentration (µM) | Assay Signal | 0.005 | 5   | 0.01 | 10   | 0.02 | 25  | 0.05 | 40  | 0.1 | 55   | 0.2 | 70   | 0.5 | 80  |
|--------------------|--------------|-----------------------------------------------------------------------------------|-------|--------|--------|-----------------------------------------------------------------------------------------------------------------------------------------------------------------------------------------------------------------------------------------------------------------------------------------------------------------------------------------------------------------------------------------------------------------------------------------------------------------------------------------------------------------|--------------------|--------------|-------|-----|------|------|------|-----|------|-----|-----|------|-----|------|-----|-----|
| Concentration (µM) | Assay Signal |                                                                                   |       |        |        |                                                                                                                                                                                                                                                                                                                                                                                                                                                                                                                 |                    |              |       |     |      |      |      |     |      |     |     |      |     |      |     |     |
| 0.005              | 5            |                                                                                   |       |        |        |                                                                                                                                                                                                                                                                                                                                                                                                                                                                                                                 |                    |              |       |     |      |      |      |     |      |     |     |      |     |      |     |     |
| 0.01               | 10           |                                                                                   |       |        |        |                                                                                                                                                                                                                                                                                                                                                                                                                                                                                                                 |                    |              |       |     |      |      |      |     |      |     |     |      |     |      |     |     |
| 0.02               | 25           |                                                                                   |       |        |        |                                                                                                                                                                                                                                                                                                                                                                                                                                                                                                                 |                    |              |       |     |      |      |      |     |      |     |     |      |     |      |     |     |
| 0.05               | 40           |                                                                                   |       |        |        |                                                                                                                                                                                                                                                                                                                                                                                                                                                                                                                 |                    |              |       |     |      |      |      |     |      |     |     |      |     |      |     |     |
| 0.1                | 55           |                                                                                   |       |        |        |                                                                                                                                                                                                                                                                                                                                                                                                                                                                                                                 |                    |              |       |     |      |      |      |     |      |     |     |      |     |      |     |     |
| 0.2                | 70           |                                                                                   |       |        |        |                                                                                                                                                                                                                                                                                                                                                                                                                                                                                                                 |                    |              |       |     |      |      |      |     |      |     |     |      |     |      |     |     |
| 0.5                | 80           |                                                                                   |       |        |        |                                                                                                                                                                                                                                                                                                                                                                                                                                                                                                                 |                    |              |       |     |      |      |      |     |      |     |     |      |     |      |     |     |
| 148                | Q15717       |  | 51.14 | -2.467 | 0.9914 |  <table border="1"> <caption>Approximate data points for Q15717</caption> <thead> <tr> <th>Concentration (µM)</th> <th>Assay Signal</th> </tr> </thead> <tbody> <tr><td>1</td><td>1.0</td></tr> <tr><td>2</td><td>0.95</td></tr> <tr><td>5</td><td>1.0</td></tr> <tr><td>10</td><td>1.0</td></tr> <tr><td>20</td><td>0.95</td></tr> <tr><td>50</td><td>0.65</td></tr> <tr><td>100</td><td>0.4</td></tr> </tbody> </table>   | Concentration (µM) | Assay Signal | 1     | 1.0 | 2    | 0.95 | 5    | 1.0 | 10   | 1.0 | 20  | 0.95 | 50  | 0.65 | 100 | 0.4 |
| Concentration (µM) | Assay Signal |                                                                                   |       |        |        |                                                                                                                                                                                                                                                                                                                                                                                                                                                                                                                 |                    |              |       |     |      |      |      |     |      |     |     |      |     |      |     |     |
| 1                  | 1.0          |                                                                                   |       |        |        |                                                                                                                                                                                                                                                                                                                                                                                                                                                                                                                 |                    |              |       |     |      |      |      |     |      |     |     |      |     |      |     |     |
| 2                  | 0.95         |                                                                                   |       |        |        |                                                                                                                                                                                                                                                                                                                                                                                                                                                                                                                 |                    |              |       |     |      |      |      |     |      |     |     |      |     |      |     |     |
| 5                  | 1.0          |                                                                                   |       |        |        |                                                                                                                                                                                                                                                                                                                                                                                                                                                                                                                 |                    |              |       |     |      |      |      |     |      |     |     |      |     |      |     |     |
| 10                 | 1.0          |                                                                                   |       |        |        |                                                                                                                                                                                                                                                                                                                                                                                                                                                                                                                 |                    |              |       |     |      |      |      |     |      |     |     |      |     |      |     |     |
| 20                 | 0.95         |                                                                                   |       |        |        |                                                                                                                                                                                                                                                                                                                                                                                                                                                                                                                 |                    |              |       |     |      |      |      |     |      |     |     |      |     |      |     |     |
| 50                 | 0.65         |                                                                                   |       |        |        |                                                                                                                                                                                                                                                                                                                                                                                                                                                                                                                 |                    |              |       |     |      |      |      |     |      |     |     |      |     |      |     |     |
| 100                | 0.4          |                                                                                   |       |        |        |                                                                                                                                                                                                                                                                                                                                                                                                                                                                                                                 |                    |              |       |     |      |      |      |     |      |     |     |      |     |      |     |     |

| 151                | O15554       | 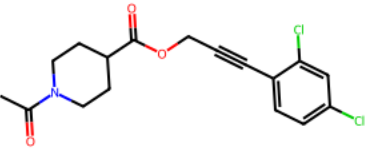 | 5.766 | 2.509   | 0.9775 |  <table border="1"> <caption>Approximate data points for O15554</caption> <thead> <tr> <th>Concentration (µM)</th> <th>Assay Signal</th> </tr> </thead> <tbody> <tr> <td>2</td> <td>0.15</td> </tr> <tr> <td>5</td> <td>0.4</td> </tr> <tr> <td>10</td> <td>0.85</td> </tr> <tr> <td>20</td> <td>1.0</td> </tr> </tbody> </table>                                                                       | Concentration (µM) | Assay Signal | 2  | 0.15 | 5  | 0.4 | 10 | 0.85 | 20  | 1.0 |     |    |     |    |
|--------------------|--------------|-----------------------------------------------------------------------------------|-------|---------|--------|--------------------------------------------------------------------------------------------------------------------------------------------------------------------------------------------------------------------------------------------------------------------------------------------------------------------------------------------------------------------------------------------------------------------------------------------------------------------------------------------|--------------------|--------------|----|------|----|-----|----|------|-----|-----|-----|----|-----|----|
| Concentration (µM) | Assay Signal |                                                                                   |       |         |        |                                                                                                                                                                                                                                                                                                                                                                                                                                                                                            |                    |              |    |      |    |     |    |      |     |     |     |    |     |    |
| 2                  | 0.15         |                                                                                   |       |         |        |                                                                                                                                                                                                                                                                                                                                                                                                                                                                                            |                    |              |    |      |    |     |    |      |     |     |     |    |     |    |
| 5                  | 0.4          |                                                                                   |       |         |        |                                                                                                                                                                                                                                                                                                                                                                                                                                                                                            |                    |              |    |      |    |     |    |      |     |     |     |    |     |    |
| 10                 | 0.85         |                                                                                   |       |         |        |                                                                                                                                                                                                                                                                                                                                                                                                                                                                                            |                    |              |    |      |    |     |    |      |     |     |     |    |     |    |
| 20                 | 1.0          |                                                                                   |       |         |        |                                                                                                                                                                                                                                                                                                                                                                                                                                                                                            |                    |              |    |      |    |     |    |      |     |     |     |    |     |    |
| 153                | P55851       |  | 993.1 | -0.9156 | 0.9803 |  <table border="1"> <caption>Approximate data points for P55851</caption> <thead> <tr> <th>Concentration (µM)</th> <th>Assay Signal</th> </tr> </thead> <tbody> <tr> <td>15</td> <td>95</td> </tr> <tr> <td>30</td> <td>90</td> </tr> <tr> <td>60</td> <td>85</td> </tr> <tr> <td>150</td> <td>75</td> </tr> <tr> <td>300</td> <td>55</td> </tr> <tr> <td>800</td> <td>30</td> </tr> </tbody> </table> | Concentration (µM) | Assay Signal | 15 | 95   | 30 | 90  | 60 | 85   | 150 | 75  | 300 | 55 | 800 | 30 |
| Concentration (µM) | Assay Signal |                                                                                   |       |         |        |                                                                                                                                                                                                                                                                                                                                                                                                                                                                                            |                    |              |    |      |    |     |    |      |     |     |     |    |     |    |
| 15                 | 95           |                                                                                   |       |         |        |                                                                                                                                                                                                                                                                                                                                                                                                                                                                                            |                    |              |    |      |    |     |    |      |     |     |     |    |     |    |
| 30                 | 90           |                                                                                   |       |         |        |                                                                                                                                                                                                                                                                                                                                                                                                                                                                                            |                    |              |    |      |    |     |    |      |     |     |     |    |     |    |
| 60                 | 85           |                                                                                   |       |         |        |                                                                                                                                                                                                                                                                                                                                                                                                                                                                                            |                    |              |    |      |    |     |    |      |     |     |     |    |     |    |
| 150                | 75           |                                                                                   |       |         |        |                                                                                                                                                                                                                                                                                                                                                                                                                                                                                            |                    |              |    |      |    |     |    |      |     |     |     |    |     |    |
| 300                | 55           |                                                                                   |       |         |        |                                                                                                                                                                                                                                                                                                                                                                                                                                                                                            |                    |              |    |      |    |     |    |      |     |     |     |    |     |    |
| 800                | 30           |                                                                                   |       |         |        |                                                                                                                                                                                                                                                                                                                                                                                                                                                                                            |                    |              |    |      |    |     |    |      |     |     |     |    |     |    |

| 163                | P0DTD1       | 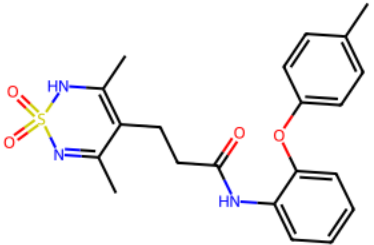  | 30.11 | -2.854 | 0.9938 |  <table border="1"> <caption>Approximate data points for P0DTD1</caption> <thead> <tr> <th>Concentration (μM)</th> <th>Assay Signal</th> </tr> </thead> <tbody> <tr><td>10</td><td>85</td></tr> <tr><td>20</td><td>60</td></tr> <tr><td>30</td><td>35</td></tr> <tr><td>40</td><td>20</td></tr> <tr><td>60</td><td>10</td></tr> <tr><td>100</td><td>5</td></tr> <tr><td>200</td><td>3</td></tr> <tr><td>300</td><td>2</td></tr> <tr><td>400</td><td>1</td></tr> </tbody> </table> | Concentration (μM) | Assay Signal | 10 | 85 | 20 | 60 | 30 | 35 | 40 | 20 | 60  | 10  | 100 | 5 | 200 | 3 | 300 | 2 | 400 | 1 |
|--------------------|--------------|------------------------------------------------------------------------------------|-------|--------|--------|----------------------------------------------------------------------------------------------------------------------------------------------------------------------------------------------------------------------------------------------------------------------------------------------------------------------------------------------------------------------------------------------------------------------------------------------------------------------------------------------------------------------------------------------------------------------|--------------------|--------------|----|----|----|----|----|----|----|----|-----|-----|-----|---|-----|---|-----|---|-----|---|
| Concentration (μM) | Assay Signal |                                                                                    |       |        |        |                                                                                                                                                                                                                                                                                                                                                                                                                                                                                                                                                                      |                    |              |    |    |    |    |    |    |    |    |     |     |     |   |     |   |     |   |     |   |
| 10                 | 85           |                                                                                    |       |        |        |                                                                                                                                                                                                                                                                                                                                                                                                                                                                                                                                                                      |                    |              |    |    |    |    |    |    |    |    |     |     |     |   |     |   |     |   |     |   |
| 20                 | 60           |                                                                                    |       |        |        |                                                                                                                                                                                                                                                                                                                                                                                                                                                                                                                                                                      |                    |              |    |    |    |    |    |    |    |    |     |     |     |   |     |   |     |   |     |   |
| 30                 | 35           |                                                                                    |       |        |        |                                                                                                                                                                                                                                                                                                                                                                                                                                                                                                                                                                      |                    |              |    |    |    |    |    |    |    |    |     |     |     |   |     |   |     |   |     |   |
| 40                 | 20           |                                                                                    |       |        |        |                                                                                                                                                                                                                                                                                                                                                                                                                                                                                                                                                                      |                    |              |    |    |    |    |    |    |    |    |     |     |     |   |     |   |     |   |     |   |
| 60                 | 10           |                                                                                    |       |        |        |                                                                                                                                                                                                                                                                                                                                                                                                                                                                                                                                                                      |                    |              |    |    |    |    |    |    |    |    |     |     |     |   |     |   |     |   |     |   |
| 100                | 5            |                                                                                    |       |        |        |                                                                                                                                                                                                                                                                                                                                                                                                                                                                                                                                                                      |                    |              |    |    |    |    |    |    |    |    |     |     |     |   |     |   |     |   |     |   |
| 200                | 3            |                                                                                    |       |        |        |                                                                                                                                                                                                                                                                                                                                                                                                                                                                                                                                                                      |                    |              |    |    |    |    |    |    |    |    |     |     |     |   |     |   |     |   |     |   |
| 300                | 2            |                                                                                    |       |        |        |                                                                                                                                                                                                                                                                                                                                                                                                                                                                                                                                                                      |                    |              |    |    |    |    |    |    |    |    |     |     |     |   |     |   |     |   |     |   |
| 400                | 1            |                                                                                    |       |        |        |                                                                                                                                                                                                                                                                                                                                                                                                                                                                                                                                                                      |                    |              |    |    |    |    |    |    |    |    |     |     |     |   |     |   |     |   |     |   |
| 169                | P52270       |  | 16.43 | 3.979  | 0.9899 |  <table border="1"> <caption>Approximate data points for P52270</caption> <thead> <tr> <th>Concentration (μM)</th> <th>Assay Signal</th> </tr> </thead> <tbody> <tr><td>5</td><td>10</td></tr> <tr><td>10</td><td>25</td></tr> <tr><td>20</td><td>85</td></tr> <tr><td>50</td><td>95</td></tr> <tr><td>100</td><td>100</td></tr> </tbody> </table>                                                                                                                               | Concentration (μM) | Assay Signal | 5  | 10 | 10 | 25 | 20 | 85 | 50 | 95 | 100 | 100 |     |   |     |   |     |   |     |   |
| Concentration (μM) | Assay Signal |                                                                                    |       |        |        |                                                                                                                                                                                                                                                                                                                                                                                                                                                                                                                                                                      |                    |              |    |    |    |    |    |    |    |    |     |     |     |   |     |   |     |   |     |   |
| 5                  | 10           |                                                                                    |       |        |        |                                                                                                                                                                                                                                                                                                                                                                                                                                                                                                                                                                      |                    |              |    |    |    |    |    |    |    |    |     |     |     |   |     |   |     |   |     |   |
| 10                 | 25           |                                                                                    |       |        |        |                                                                                                                                                                                                                                                                                                                                                                                                                                                                                                                                                                      |                    |              |    |    |    |    |    |    |    |    |     |     |     |   |     |   |     |   |     |   |
| 20                 | 85           |                                                                                    |       |        |        |                                                                                                                                                                                                                                                                                                                                                                                                                                                                                                                                                                      |                    |              |    |    |    |    |    |    |    |    |     |     |     |   |     |   |     |   |     |   |
| 50                 | 95           |                                                                                    |       |        |        |                                                                                                                                                                                                                                                                                                                                                                                                                                                                                                                                                                      |                    |              |    |    |    |    |    |    |    |    |     |     |     |   |     |   |     |   |     |   |
| 100                | 100          |                                                                                    |       |        |        |                                                                                                                                                                                                                                                                                                                                                                                                                                                                                                                                                                      |                    |              |    |    |    |    |    |    |    |    |     |     |     |   |     |   |     |   |     |   |

| 174                | A0A6L0XSJ0   | 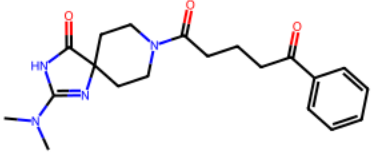 | 1.583 | -1.331 | 0.896  |  <table border="1" data-bbox="1461 224 1833 602"> <caption>Approximate data points for A0A6L0XSJ0</caption> <thead> <tr> <th>Concentration (µM)</th> <th>Assay Signal</th> </tr> </thead> <tbody> <tr><td>0.3</td><td>68</td></tr> <tr><td>0.6</td><td>58</td></tr> <tr><td>1.2</td><td>48</td></tr> <tr><td>2.4</td><td>35</td></tr> <tr><td>4.8</td><td>22</td></tr> <tr><td>9.6</td><td>18</td></tr> </tbody> </table>                                        | Concentration (µM) | Assay Signal | 0.3 | 68  | 0.6 | 58  | 1.2 | 48  | 2.4 | 35  | 4.8 | 22  | 9.6 | 18  |      |     |
|--------------------|--------------|-----------------------------------------------------------------------------------|-------|--------|--------|-----------------------------------------------------------------------------------------------------------------------------------------------------------------------------------------------------------------------------------------------------------------------------------------------------------------------------------------------------------------------------------------------------------------------------------------------------------------------------------------------------------------------------------------------------|--------------------|--------------|-----|-----|-----|-----|-----|-----|-----|-----|-----|-----|-----|-----|------|-----|
| Concentration (µM) | Assay Signal |                                                                                   |       |        |        |                                                                                                                                                                                                                                                                                                                                                                                                                                                                                                                                                     |                    |              |     |     |     |     |     |     |     |     |     |     |     |     |      |     |
| 0.3                | 68           |                                                                                   |       |        |        |                                                                                                                                                                                                                                                                                                                                                                                                                                                                                                                                                     |                    |              |     |     |     |     |     |     |     |     |     |     |     |     |      |     |
| 0.6                | 58           |                                                                                   |       |        |        |                                                                                                                                                                                                                                                                                                                                                                                                                                                                                                                                                     |                    |              |     |     |     |     |     |     |     |     |     |     |     |     |      |     |
| 1.2                | 48           |                                                                                   |       |        |        |                                                                                                                                                                                                                                                                                                                                                                                                                                                                                                                                                     |                    |              |     |     |     |     |     |     |     |     |     |     |     |     |      |     |
| 2.4                | 35           |                                                                                   |       |        |        |                                                                                                                                                                                                                                                                                                                                                                                                                                                                                                                                                     |                    |              |     |     |     |     |     |     |     |     |     |     |     |     |      |     |
| 4.8                | 22           |                                                                                   |       |        |        |                                                                                                                                                                                                                                                                                                                                                                                                                                                                                                                                                     |                    |              |     |     |     |     |     |     |     |     |     |     |     |     |      |     |
| 9.6                | 18           |                                                                                   |       |        |        |                                                                                                                                                                                                                                                                                                                                                                                                                                                                                                                                                     |                    |              |     |     |     |     |     |     |     |     |     |     |     |     |      |     |
| 178                | Q9R1M7       |  | 6.215 | 1.984  | 0.9989 |  <table border="1" data-bbox="1461 667 1833 1045"> <caption>Approximate data points for Q9R1M7</caption> <thead> <tr> <th>Concentration (µM)</th> <th>Assay Signal</th> </tr> </thead> <tbody> <tr><td>0.1</td><td>105</td></tr> <tr><td>0.2</td><td>105</td></tr> <tr><td>0.5</td><td>115</td></tr> <tr><td>1.0</td><td>135</td></tr> <tr><td>2.0</td><td>185</td></tr> <tr><td>5.0</td><td>215</td></tr> <tr><td>10.0</td><td>240</td></tr> </tbody> </table> | Concentration (µM) | Assay Signal | 0.1 | 105 | 0.2 | 105 | 0.5 | 115 | 1.0 | 135 | 2.0 | 185 | 5.0 | 215 | 10.0 | 240 |
| Concentration (µM) | Assay Signal |                                                                                   |       |        |        |                                                                                                                                                                                                                                                                                                                                                                                                                                                                                                                                                     |                    |              |     |     |     |     |     |     |     |     |     |     |     |     |      |     |
| 0.1                | 105          |                                                                                   |       |        |        |                                                                                                                                                                                                                                                                                                                                                                                                                                                                                                                                                     |                    |              |     |     |     |     |     |     |     |     |     |     |     |     |      |     |
| 0.2                | 105          |                                                                                   |       |        |        |                                                                                                                                                                                                                                                                                                                                                                                                                                                                                                                                                     |                    |              |     |     |     |     |     |     |     |     |     |     |     |     |      |     |
| 0.5                | 115          |                                                                                   |       |        |        |                                                                                                                                                                                                                                                                                                                                                                                                                                                                                                                                                     |                    |              |     |     |     |     |     |     |     |     |     |     |     |     |      |     |
| 1.0                | 135          |                                                                                   |       |        |        |                                                                                                                                                                                                                                                                                                                                                                                                                                                                                                                                                     |                    |              |     |     |     |     |     |     |     |     |     |     |     |     |      |     |
| 2.0                | 185          |                                                                                   |       |        |        |                                                                                                                                                                                                                                                                                                                                                                                                                                                                                                                                                     |                    |              |     |     |     |     |     |     |     |     |     |     |     |     |      |     |
| 5.0                | 215          |                                                                                   |       |        |        |                                                                                                                                                                                                                                                                                                                                                                                                                                                                                                                                                     |                    |              |     |     |     |     |     |     |     |     |     |     |     |     |      |     |
| 10.0               | 240          |                                                                                   |       |        |        |                                                                                                                                                                                                                                                                                                                                                                                                                                                                                                                                                     |                    |              |     |     |     |     |     |     |     |     |     |     |     |     |      |     |

| 182                | Q13469       | 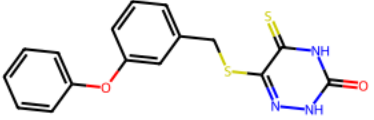 | 0.58  | -1.313 | 0.9711 |  <table border="1"> <caption>Approximate data points for Q13469</caption> <thead> <tr> <th>Concentration (µM)</th> <th>Assay Signal</th> </tr> </thead> <tbody> <tr><td>0.01</td><td>85</td></tr> <tr><td>0.02</td><td>95</td></tr> <tr><td>0.05</td><td>85</td></tr> <tr><td>0.1</td><td>25</td></tr> <tr><td>0.2</td><td>20</td></tr> <tr><td>0.5</td><td>10</td></tr> <tr><td>1</td><td>5</td></tr> <tr><td>2</td><td>5</td></tr> <tr><td>5</td><td>5</td></tr> <tr><td>10</td><td>5</td></tr> <tr><td>20</td><td>5</td></tr> <tr><td>50</td><td>5</td></tr> <tr><td>100</td><td>5</td></tr> </tbody> </table> | Concentration (µM) | Assay Signal | 0.01 | 85 | 0.02 | 95 | 0.05 | 85 | 0.1 | 25 | 0.2 | 20 | 0.5 | 10 | 1  | 5  | 2   | 5  | 5   | 5  | 10 | 5 | 20 | 5 | 50 | 5 | 100 | 5 |
|--------------------|--------------|-----------------------------------------------------------------------------------|-------|--------|--------|------------------------------------------------------------------------------------------------------------------------------------------------------------------------------------------------------------------------------------------------------------------------------------------------------------------------------------------------------------------------------------------------------------------------------------------------------------------------------------------------------------------------------------------------------------------------------------------------------------------------------------------------------------------------------------------------------|--------------------|--------------|------|----|------|----|------|----|-----|----|-----|----|-----|----|----|----|-----|----|-----|----|----|---|----|---|----|---|-----|---|
| Concentration (µM) | Assay Signal |                                                                                   |       |        |        |                                                                                                                                                                                                                                                                                                                                                                                                                                                                                                                                                                                                                                                                                                      |                    |              |      |    |      |    |      |    |     |    |     |    |     |    |    |    |     |    |     |    |    |   |    |   |    |   |     |   |
| 0.01               | 85           |                                                                                   |       |        |        |                                                                                                                                                                                                                                                                                                                                                                                                                                                                                                                                                                                                                                                                                                      |                    |              |      |    |      |    |      |    |     |    |     |    |     |    |    |    |     |    |     |    |    |   |    |   |    |   |     |   |
| 0.02               | 95           |                                                                                   |       |        |        |                                                                                                                                                                                                                                                                                                                                                                                                                                                                                                                                                                                                                                                                                                      |                    |              |      |    |      |    |      |    |     |    |     |    |     |    |    |    |     |    |     |    |    |   |    |   |    |   |     |   |
| 0.05               | 85           |                                                                                   |       |        |        |                                                                                                                                                                                                                                                                                                                                                                                                                                                                                                                                                                                                                                                                                                      |                    |              |      |    |      |    |      |    |     |    |     |    |     |    |    |    |     |    |     |    |    |   |    |   |    |   |     |   |
| 0.1                | 25           |                                                                                   |       |        |        |                                                                                                                                                                                                                                                                                                                                                                                                                                                                                                                                                                                                                                                                                                      |                    |              |      |    |      |    |      |    |     |    |     |    |     |    |    |    |     |    |     |    |    |   |    |   |    |   |     |   |
| 0.2                | 20           |                                                                                   |       |        |        |                                                                                                                                                                                                                                                                                                                                                                                                                                                                                                                                                                                                                                                                                                      |                    |              |      |    |      |    |      |    |     |    |     |    |     |    |    |    |     |    |     |    |    |   |    |   |    |   |     |   |
| 0.5                | 10           |                                                                                   |       |        |        |                                                                                                                                                                                                                                                                                                                                                                                                                                                                                                                                                                                                                                                                                                      |                    |              |      |    |      |    |      |    |     |    |     |    |     |    |    |    |     |    |     |    |    |   |    |   |    |   |     |   |
| 1                  | 5            |                                                                                   |       |        |        |                                                                                                                                                                                                                                                                                                                                                                                                                                                                                                                                                                                                                                                                                                      |                    |              |      |    |      |    |      |    |     |    |     |    |     |    |    |    |     |    |     |    |    |   |    |   |    |   |     |   |
| 2                  | 5            |                                                                                   |       |        |        |                                                                                                                                                                                                                                                                                                                                                                                                                                                                                                                                                                                                                                                                                                      |                    |              |      |    |      |    |      |    |     |    |     |    |     |    |    |    |     |    |     |    |    |   |    |   |    |   |     |   |
| 5                  | 5            |                                                                                   |       |        |        |                                                                                                                                                                                                                                                                                                                                                                                                                                                                                                                                                                                                                                                                                                      |                    |              |      |    |      |    |      |    |     |    |     |    |     |    |    |    |     |    |     |    |    |   |    |   |    |   |     |   |
| 10                 | 5            |                                                                                   |       |        |        |                                                                                                                                                                                                                                                                                                                                                                                                                                                                                                                                                                                                                                                                                                      |                    |              |      |    |      |    |      |    |     |    |     |    |     |    |    |    |     |    |     |    |    |   |    |   |    |   |     |   |
| 20                 | 5            |                                                                                   |       |        |        |                                                                                                                                                                                                                                                                                                                                                                                                                                                                                                                                                                                                                                                                                                      |                    |              |      |    |      |    |      |    |     |    |     |    |     |    |    |    |     |    |     |    |    |   |    |   |    |   |     |   |
| 50                 | 5            |                                                                                   |       |        |        |                                                                                                                                                                                                                                                                                                                                                                                                                                                                                                                                                                                                                                                                                                      |                    |              |      |    |      |    |      |    |     |    |     |    |     |    |    |    |     |    |     |    |    |   |    |   |    |   |     |   |
| 100                | 5            |                                                                                   |       |        |        |                                                                                                                                                                                                                                                                                                                                                                                                                                                                                                                                                                                                                                                                                                      |                    |              |      |    |      |    |      |    |     |    |     |    |     |    |    |    |     |    |     |    |    |   |    |   |    |   |     |   |
| 183                | P9WNS3       |  | 195.6 | 1.848  | 0.9564 |  <table border="1"> <caption>Approximate data points for P9WNS3</caption> <thead> <tr> <th>Concentration (µM)</th> <th>Assay Signal</th> </tr> </thead> <tbody> <tr><td>0.5</td><td>12</td></tr> <tr><td>1</td><td>15</td></tr> <tr><td>2</td><td>5</td></tr> <tr><td>5</td><td>5</td></tr> <tr><td>10</td><td>10</td></tr> <tr><td>20</td><td>12</td></tr> <tr><td>50</td><td>18</td></tr> <tr><td>100</td><td>30</td></tr> <tr><td>200</td><td>55</td></tr> </tbody> </table>                                                                                                                                  | Concentration (µM) | Assay Signal | 0.5  | 12 | 1    | 15 | 2    | 5  | 5   | 5  | 10  | 10 | 20  | 12 | 50 | 18 | 100 | 30 | 200 | 55 |    |   |    |   |    |   |     |   |
| Concentration (µM) | Assay Signal |                                                                                   |       |        |        |                                                                                                                                                                                                                                                                                                                                                                                                                                                                                                                                                                                                                                                                                                      |                    |              |      |    |      |    |      |    |     |    |     |    |     |    |    |    |     |    |     |    |    |   |    |   |    |   |     |   |
| 0.5                | 12           |                                                                                   |       |        |        |                                                                                                                                                                                                                                                                                                                                                                                                                                                                                                                                                                                                                                                                                                      |                    |              |      |    |      |    |      |    |     |    |     |    |     |    |    |    |     |    |     |    |    |   |    |   |    |   |     |   |
| 1                  | 15           |                                                                                   |       |        |        |                                                                                                                                                                                                                                                                                                                                                                                                                                                                                                                                                                                                                                                                                                      |                    |              |      |    |      |    |      |    |     |    |     |    |     |    |    |    |     |    |     |    |    |   |    |   |    |   |     |   |
| 2                  | 5            |                                                                                   |       |        |        |                                                                                                                                                                                                                                                                                                                                                                                                                                                                                                                                                                                                                                                                                                      |                    |              |      |    |      |    |      |    |     |    |     |    |     |    |    |    |     |    |     |    |    |   |    |   |    |   |     |   |
| 5                  | 5            |                                                                                   |       |        |        |                                                                                                                                                                                                                                                                                                                                                                                                                                                                                                                                                                                                                                                                                                      |                    |              |      |    |      |    |      |    |     |    |     |    |     |    |    |    |     |    |     |    |    |   |    |   |    |   |     |   |
| 10                 | 10           |                                                                                   |       |        |        |                                                                                                                                                                                                                                                                                                                                                                                                                                                                                                                                                                                                                                                                                                      |                    |              |      |    |      |    |      |    |     |    |     |    |     |    |    |    |     |    |     |    |    |   |    |   |    |   |     |   |
| 20                 | 12           |                                                                                   |       |        |        |                                                                                                                                                                                                                                                                                                                                                                                                                                                                                                                                                                                                                                                                                                      |                    |              |      |    |      |    |      |    |     |    |     |    |     |    |    |    |     |    |     |    |    |   |    |   |    |   |     |   |
| 50                 | 18           |                                                                                   |       |        |        |                                                                                                                                                                                                                                                                                                                                                                                                                                                                                                                                                                                                                                                                                                      |                    |              |      |    |      |    |      |    |     |    |     |    |     |    |    |    |     |    |     |    |    |   |    |   |    |   |     |   |
| 100                | 30           |                                                                                   |       |        |        |                                                                                                                                                                                                                                                                                                                                                                                                                                                                                                                                                                                                                                                                                                      |                    |              |      |    |      |    |      |    |     |    |     |    |     |    |    |    |     |    |     |    |    |   |    |   |    |   |     |   |
| 200                | 55           |                                                                                   |       |        |        |                                                                                                                                                                                                                                                                                                                                                                                                                                                                                                                                                                                                                                                                                                      |                    |              |      |    |      |    |      |    |     |    |     |    |     |    |    |    |     |    |     |    |    |   |    |   |    |   |     |   |

| 186                | Q06330       | 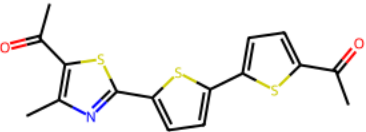 | 1.657 | 2.806  | 1.0    |  <table border="1" data-bbox="1461 224 1822 597"> <caption>Approximate data points for Q06330</caption> <thead> <tr> <th>Concentration (µM)</th> <th>Assay Signal</th> </tr> </thead> <tbody> <tr><td>0.1</td><td>50000</td></tr> <tr><td>0.2</td><td>50000</td></tr> <tr><td>0.5</td><td>50000</td></tr> <tr><td>1</td><td>80000</td></tr> <tr><td>2</td><td>120000</td></tr> <tr><td>5</td><td>190000</td></tr> <tr><td>10</td><td>220000</td></tr> </tbody> </table> | Concentration (µM) | Assay Signal | 0.1 | 50000 | 0.2 | 50000 | 0.5 | 50000 | 1  | 80000 | 2  | 120000 | 5  | 190000 | 10  | 220000 |
|--------------------|--------------|-----------------------------------------------------------------------------------|-------|--------|--------|------------------------------------------------------------------------------------------------------------------------------------------------------------------------------------------------------------------------------------------------------------------------------------------------------------------------------------------------------------------------------------------------------------------------------------------------------------------------------------------------------------------------------------------------------------|--------------------|--------------|-----|-------|-----|-------|-----|-------|----|-------|----|--------|----|--------|-----|--------|
| Concentration (µM) | Assay Signal |                                                                                   |       |        |        |                                                                                                                                                                                                                                                                                                                                                                                                                                                                                                                                                            |                    |              |     |       |     |       |     |       |    |       |    |        |    |        |     |        |
| 0.1                | 50000        |                                                                                   |       |        |        |                                                                                                                                                                                                                                                                                                                                                                                                                                                                                                                                                            |                    |              |     |       |     |       |     |       |    |       |    |        |    |        |     |        |
| 0.2                | 50000        |                                                                                   |       |        |        |                                                                                                                                                                                                                                                                                                                                                                                                                                                                                                                                                            |                    |              |     |       |     |       |     |       |    |       |    |        |    |        |     |        |
| 0.5                | 50000        |                                                                                   |       |        |        |                                                                                                                                                                                                                                                                                                                                                                                                                                                                                                                                                            |                    |              |     |       |     |       |     |       |    |       |    |        |    |        |     |        |
| 1                  | 80000        |                                                                                   |       |        |        |                                                                                                                                                                                                                                                                                                                                                                                                                                                                                                                                                            |                    |              |     |       |     |       |     |       |    |       |    |        |    |        |     |        |
| 2                  | 120000       |                                                                                   |       |        |        |                                                                                                                                                                                                                                                                                                                                                                                                                                                                                                                                                            |                    |              |     |       |     |       |     |       |    |       |    |        |    |        |     |        |
| 5                  | 190000       |                                                                                   |       |        |        |                                                                                                                                                                                                                                                                                                                                                                                                                                                                                                                                                            |                    |              |     |       |     |       |     |       |    |       |    |        |    |        |     |        |
| 10                 | 220000       |                                                                                   |       |        |        |                                                                                                                                                                                                                                                                                                                                                                                                                                                                                                                                                            |                    |              |     |       |     |       |     |       |    |       |    |        |    |        |     |        |
| 191                | P9WJY9       |  | 25.64 | -2.987 | 0.9906 |  <table border="1" data-bbox="1461 670 1822 1044"> <caption>Approximate data points for P9WJY9</caption> <thead> <tr> <th>Concentration (µM)</th> <th>Assay Signal</th> </tr> </thead> <tbody> <tr><td>1</td><td>100</td></tr> <tr><td>2</td><td>95</td></tr> <tr><td>5</td><td>90</td></tr> <tr><td>10</td><td>85</td></tr> <tr><td>20</td><td>50</td></tr> <tr><td>50</td><td>10</td></tr> <tr><td>100</td><td>5</td></tr> </tbody> </table>                         | Concentration (µM) | Assay Signal | 1   | 100   | 2   | 95    | 5   | 90    | 10 | 85    | 20 | 50     | 50 | 10     | 100 | 5      |
| Concentration (µM) | Assay Signal |                                                                                   |       |        |        |                                                                                                                                                                                                                                                                                                                                                                                                                                                                                                                                                            |                    |              |     |       |     |       |     |       |    |       |    |        |    |        |     |        |
| 1                  | 100          |                                                                                   |       |        |        |                                                                                                                                                                                                                                                                                                                                                                                                                                                                                                                                                            |                    |              |     |       |     |       |     |       |    |       |    |        |    |        |     |        |
| 2                  | 95           |                                                                                   |       |        |        |                                                                                                                                                                                                                                                                                                                                                                                                                                                                                                                                                            |                    |              |     |       |     |       |     |       |    |       |    |        |    |        |     |        |
| 5                  | 90           |                                                                                   |       |        |        |                                                                                                                                                                                                                                                                                                                                                                                                                                                                                                                                                            |                    |              |     |       |     |       |     |       |    |       |    |        |    |        |     |        |
| 10                 | 85           |                                                                                   |       |        |        |                                                                                                                                                                                                                                                                                                                                                                                                                                                                                                                                                            |                    |              |     |       |     |       |     |       |    |       |    |        |    |        |     |        |
| 20                 | 50           |                                                                                   |       |        |        |                                                                                                                                                                                                                                                                                                                                                                                                                                                                                                                                                            |                    |              |     |       |     |       |     |       |    |       |    |        |    |        |     |        |
| 50                 | 10           |                                                                                   |       |        |        |                                                                                                                                                                                                                                                                                                                                                                                                                                                                                                                                                            |                    |              |     |       |     |       |     |       |    |       |    |        |    |        |     |        |
| 100                | 5            |                                                                                   |       |        |        |                                                                                                                                                                                                                                                                                                                                                                                                                                                                                                                                                            |                    |              |     |       |     |       |     |       |    |       |    |        |    |        |     |        |

| 197                | P52333       | 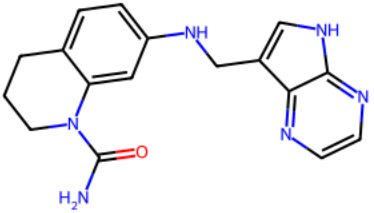 | 36.98 | -1.934  | 0.8727 |  <table border="1"> <caption>Approximate data points for P52333</caption> <thead> <tr> <th>Concentration (µM)</th> <th>Assay Signal</th> </tr> </thead> <tbody> <tr><td>0.5</td><td>1.05</td></tr> <tr><td>1</td><td>0.95</td></tr> <tr><td>2</td><td>0.9</td></tr> <tr><td>5</td><td>0.9</td></tr> <tr><td>10</td><td>0.8</td></tr> <tr><td>20</td><td>0.75</td></tr> <tr><td>50</td><td>0.45</td></tr> <tr><td>100</td><td>0.3</td></tr> </tbody> </table>                                    | Concentration (µM) | Assay Signal | 0.5 | 1.05 | 1 | 0.95 | 2 | 0.9  | 5 | 0.9  | 10 | 0.8 | 20 | 0.75 | 50 | 0.45 | 100 | 0.3  |     |     |
|--------------------|--------------|-----------------------------------------------------------------------------------|-------|---------|--------|------------------------------------------------------------------------------------------------------------------------------------------------------------------------------------------------------------------------------------------------------------------------------------------------------------------------------------------------------------------------------------------------------------------------------------------------------------------------------------------------------------------------------------------------------------------------------------|--------------------|--------------|-----|------|---|------|---|------|---|------|----|-----|----|------|----|------|-----|------|-----|-----|
| Concentration (µM) | Assay Signal |                                                                                   |       |         |        |                                                                                                                                                                                                                                                                                                                                                                                                                                                                                                                                                                                    |                    |              |     |      |   |      |   |      |   |      |    |     |    |      |    |      |     |      |     |     |
| 0.5                | 1.05         |                                                                                   |       |         |        |                                                                                                                                                                                                                                                                                                                                                                                                                                                                                                                                                                                    |                    |              |     |      |   |      |   |      |   |      |    |     |    |      |    |      |     |      |     |     |
| 1                  | 0.95         |                                                                                   |       |         |        |                                                                                                                                                                                                                                                                                                                                                                                                                                                                                                                                                                                    |                    |              |     |      |   |      |   |      |   |      |    |     |    |      |    |      |     |      |     |     |
| 2                  | 0.9          |                                                                                   |       |         |        |                                                                                                                                                                                                                                                                                                                                                                                                                                                                                                                                                                                    |                    |              |     |      |   |      |   |      |   |      |    |     |    |      |    |      |     |      |     |     |
| 5                  | 0.9          |                                                                                   |       |         |        |                                                                                                                                                                                                                                                                                                                                                                                                                                                                                                                                                                                    |                    |              |     |      |   |      |   |      |   |      |    |     |    |      |    |      |     |      |     |     |
| 10                 | 0.8          |                                                                                   |       |         |        |                                                                                                                                                                                                                                                                                                                                                                                                                                                                                                                                                                                    |                    |              |     |      |   |      |   |      |   |      |    |     |    |      |    |      |     |      |     |     |
| 20                 | 0.75         |                                                                                   |       |         |        |                                                                                                                                                                                                                                                                                                                                                                                                                                                                                                                                                                                    |                    |              |     |      |   |      |   |      |   |      |    |     |    |      |    |      |     |      |     |     |
| 50                 | 0.45         |                                                                                   |       |         |        |                                                                                                                                                                                                                                                                                                                                                                                                                                                                                                                                                                                    |                    |              |     |      |   |      |   |      |   |      |    |     |    |      |    |      |     |      |     |     |
| 100                | 0.3          |                                                                                   |       |         |        |                                                                                                                                                                                                                                                                                                                                                                                                                                                                                                                                                                                    |                    |              |     |      |   |      |   |      |   |      |    |     |    |      |    |      |     |      |     |     |
| 198                | P47895       |  | 19.25 | -0.8342 | 0.976  |  <table border="1"> <caption>Approximate data points for P47895</caption> <thead> <tr> <th>Concentration (µM)</th> <th>Assay Signal</th> </tr> </thead> <tbody> <tr><td>0.5</td><td>0.85</td></tr> <tr><td>1</td><td>0.8</td></tr> <tr><td>2</td><td>0.75</td></tr> <tr><td>5</td><td>0.65</td></tr> <tr><td>10</td><td>0.5</td></tr> <tr><td>20</td><td>0.4</td></tr> <tr><td>50</td><td>0.2</td></tr> <tr><td>100</td><td>0.15</td></tr> <tr><td>200</td><td>0.1</td></tr> </tbody> </table> | Concentration (µM) | Assay Signal | 0.5 | 0.85 | 1 | 0.8  | 2 | 0.75 | 5 | 0.65 | 10 | 0.5 | 20 | 0.4  | 50 | 0.2  | 100 | 0.15 | 200 | 0.1 |
| Concentration (µM) | Assay Signal |                                                                                   |       |         |        |                                                                                                                                                                                                                                                                                                                                                                                                                                                                                                                                                                                    |                    |              |     |      |   |      |   |      |   |      |    |     |    |      |    |      |     |      |     |     |
| 0.5                | 0.85         |                                                                                   |       |         |        |                                                                                                                                                                                                                                                                                                                                                                                                                                                                                                                                                                                    |                    |              |     |      |   |      |   |      |   |      |    |     |    |      |    |      |     |      |     |     |
| 1                  | 0.8          |                                                                                   |       |         |        |                                                                                                                                                                                                                                                                                                                                                                                                                                                                                                                                                                                    |                    |              |     |      |   |      |   |      |   |      |    |     |    |      |    |      |     |      |     |     |
| 2                  | 0.75         |                                                                                   |       |         |        |                                                                                                                                                                                                                                                                                                                                                                                                                                                                                                                                                                                    |                    |              |     |      |   |      |   |      |   |      |    |     |    |      |    |      |     |      |     |     |
| 5                  | 0.65         |                                                                                   |       |         |        |                                                                                                                                                                                                                                                                                                                                                                                                                                                                                                                                                                                    |                    |              |     |      |   |      |   |      |   |      |    |     |    |      |    |      |     |      |     |     |
| 10                 | 0.5          |                                                                                   |       |         |        |                                                                                                                                                                                                                                                                                                                                                                                                                                                                                                                                                                                    |                    |              |     |      |   |      |   |      |   |      |    |     |    |      |    |      |     |      |     |     |
| 20                 | 0.4          |                                                                                   |       |         |        |                                                                                                                                                                                                                                                                                                                                                                                                                                                                                                                                                                                    |                    |              |     |      |   |      |   |      |   |      |    |     |    |      |    |      |     |      |     |     |
| 50                 | 0.2          |                                                                                   |       |         |        |                                                                                                                                                                                                                                                                                                                                                                                                                                                                                                                                                                                    |                    |              |     |      |   |      |   |      |   |      |    |     |    |      |    |      |     |      |     |     |
| 100                | 0.15         |                                                                                   |       |         |        |                                                                                                                                                                                                                                                                                                                                                                                                                                                                                                                                                                                    |                    |              |     |      |   |      |   |      |   |      |    |     |    |      |    |      |     |      |     |     |
| 200                | 0.1          |                                                                                   |       |         |        |                                                                                                                                                                                                                                                                                                                                                                                                                                                                                                                                                                                    |                    |              |     |      |   |      |   |      |   |      |    |     |    |      |    |      |     |      |     |     |

|     |        |                                                                                    |      |        |        |                                                                                      |
|-----|--------|------------------------------------------------------------------------------------|------|--------|--------|--------------------------------------------------------------------------------------|
| 199 | P08631 | 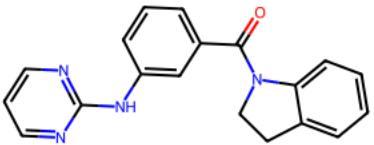  | 0.25 | -1.061 | 0.8506 |   |
| 205 | K9WT99 |  | 5.01 | 1.047  | 0.9885 |  |



| 209                | O35295       | 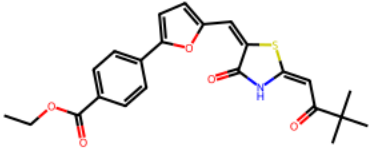 | 2.78 | -1.331 | 0.9762 |  <table border="1"> <caption>Approximate data points for O35295</caption> <thead> <tr> <th>Concentration (µM)</th> <th>Assay Signal</th> </tr> </thead> <tbody> <tr><td>0.05</td><td>100</td></tr> <tr><td>0.1</td><td>95</td></tr> <tr><td>0.5</td><td>75</td></tr> <tr><td>1</td><td>65</td></tr> <tr><td>5</td><td>55</td></tr> <tr><td>10</td><td>45</td></tr> <tr><td>50</td><td>30</td></tr> <tr><td>100</td><td>20</td></tr> </tbody> </table> | Concentration (µM) | Assay Signal | 0.05 | 100 | 0.1 | 95 | 0.5 | 75 | 1 | 65 | 5 | 55 | 10 | 45 | 50 | 30 | 100 | 20 |
|--------------------|--------------|-----------------------------------------------------------------------------------|------|--------|--------|------------------------------------------------------------------------------------------------------------------------------------------------------------------------------------------------------------------------------------------------------------------------------------------------------------------------------------------------------------------------------------------------------------------------------------------------------------------------------------------------------------------------------------------|--------------------|--------------|------|-----|-----|----|-----|----|---|----|---|----|----|----|----|----|-----|----|
| Concentration (µM) | Assay Signal |                                                                                   |      |        |        |                                                                                                                                                                                                                                                                                                                                                                                                                                                                                                                                          |                    |              |      |     |     |    |     |    |   |    |   |    |    |    |    |    |     |    |
| 0.05               | 100          |                                                                                   |      |        |        |                                                                                                                                                                                                                                                                                                                                                                                                                                                                                                                                          |                    |              |      |     |     |    |     |    |   |    |   |    |    |    |    |    |     |    |
| 0.1                | 95           |                                                                                   |      |        |        |                                                                                                                                                                                                                                                                                                                                                                                                                                                                                                                                          |                    |              |      |     |     |    |     |    |   |    |   |    |    |    |    |    |     |    |
| 0.5                | 75           |                                                                                   |      |        |        |                                                                                                                                                                                                                                                                                                                                                                                                                                                                                                                                          |                    |              |      |     |     |    |     |    |   |    |   |    |    |    |    |    |     |    |
| 1                  | 65           |                                                                                   |      |        |        |                                                                                                                                                                                                                                                                                                                                                                                                                                                                                                                                          |                    |              |      |     |     |    |     |    |   |    |   |    |    |    |    |    |     |    |
| 5                  | 55           |                                                                                   |      |        |        |                                                                                                                                                                                                                                                                                                                                                                                                                                                                                                                                          |                    |              |      |     |     |    |     |    |   |    |   |    |    |    |    |    |     |    |
| 10                 | 45           |                                                                                   |      |        |        |                                                                                                                                                                                                                                                                                                                                                                                                                                                                                                                                          |                    |              |      |     |     |    |     |    |   |    |   |    |    |    |    |    |     |    |
| 50                 | 30           |                                                                                   |      |        |        |                                                                                                                                                                                                                                                                                                                                                                                                                                                                                                                                          |                    |              |      |     |     |    |     |    |   |    |   |    |    |    |    |    |     |    |
| 100                | 20           |                                                                                   |      |        |        |                                                                                                                                                                                                                                                                                                                                                                                                                                                                                                                                          |                    |              |      |     |     |    |     |    |   |    |   |    |    |    |    |    |     |    |
| 228                | P07237       |  | 3.59 | 0.5685 | 0.9486 |  <table border="1"> <caption>Approximate data points for P07237</caption> <thead> <tr> <th>Concentration (µM)</th> <th>Assay Signal</th> </tr> </thead> <tbody> <tr><td>0.3</td><td>10</td></tr> <tr><td>0.5</td><td>15</td></tr> <tr><td>1</td><td>25</td></tr> <tr><td>2</td><td>28</td></tr> <tr><td>5</td><td>30</td></tr> <tr><td>10</td><td>40</td></tr> <tr><td>20</td><td>50</td></tr> <tr><td>30</td><td>48</td></tr> </tbody> </table>     | Concentration (µM) | Assay Signal | 0.3  | 10  | 0.5 | 15 | 1   | 25 | 2 | 28 | 5 | 30 | 10 | 40 | 20 | 50 | 30  | 48 |
| Concentration (µM) | Assay Signal |                                                                                   |      |        |        |                                                                                                                                                                                                                                                                                                                                                                                                                                                                                                                                          |                    |              |      |     |     |    |     |    |   |    |   |    |    |    |    |    |     |    |
| 0.3                | 10           |                                                                                   |      |        |        |                                                                                                                                                                                                                                                                                                                                                                                                                                                                                                                                          |                    |              |      |     |     |    |     |    |   |    |   |    |    |    |    |    |     |    |
| 0.5                | 15           |                                                                                   |      |        |        |                                                                                                                                                                                                                                                                                                                                                                                                                                                                                                                                          |                    |              |      |     |     |    |     |    |   |    |   |    |    |    |    |    |     |    |
| 1                  | 25           |                                                                                   |      |        |        |                                                                                                                                                                                                                                                                                                                                                                                                                                                                                                                                          |                    |              |      |     |     |    |     |    |   |    |   |    |    |    |    |    |     |    |
| 2                  | 28           |                                                                                   |      |        |        |                                                                                                                                                                                                                                                                                                                                                                                                                                                                                                                                          |                    |              |      |     |     |    |     |    |   |    |   |    |    |    |    |    |     |    |
| 5                  | 30           |                                                                                   |      |        |        |                                                                                                                                                                                                                                                                                                                                                                                                                                                                                                                                          |                    |              |      |     |     |    |     |    |   |    |   |    |    |    |    |    |     |    |
| 10                 | 40           |                                                                                   |      |        |        |                                                                                                                                                                                                                                                                                                                                                                                                                                                                                                                                          |                    |              |      |     |     |    |     |    |   |    |   |    |    |    |    |    |     |    |
| 20                 | 50           |                                                                                   |      |        |        |                                                                                                                                                                                                                                                                                                                                                                                                                                                                                                                                          |                    |              |      |     |     |    |     |    |   |    |   |    |    |    |    |    |     |    |
| 30                 | 48           |                                                                                   |      |        |        |                                                                                                                                                                                                                                                                                                                                                                                                                                                                                                                                          |                    |              |      |     |     |    |     |    |   |    |   |    |    |    |    |    |     |    |

| 235                | P13569       | 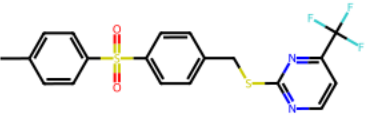 | 0.171 | 1.333   | 0.9728 |  <table border="1"> <caption>Approximate data points for P13569</caption> <thead> <tr> <th>Concentration (µM)</th> <th>Assay Signal</th> </tr> </thead> <tbody> <tr><td>0.01</td><td>110</td></tr> <tr><td>0.05</td><td>140</td></tr> <tr><td>0.1</td><td>180</td></tr> <tr><td>0.2</td><td>230</td></tr> <tr><td>0.5</td><td>260</td></tr> <tr><td>1</td><td>270</td></tr> <tr><td>2</td><td>275</td></tr> <tr><td>5</td><td>280</td></tr> <tr><td>10</td><td>275</td></tr> <tr><td>20</td><td>265</td></tr> <tr><td>50</td><td>245</td></tr> </tbody> </table> | Concentration (µM) | Assay Signal | 0.01 | 110 | 0.05 | 140 | 0.1 | 180 | 0.2 | 230 | 0.5 | 260 | 1 | 270 | 2  | 275 | 5  | 280 | 10  | 275 | 20   | 265 | 50 | 245 |
|--------------------|--------------|-----------------------------------------------------------------------------------|-------|---------|--------|-----------------------------------------------------------------------------------------------------------------------------------------------------------------------------------------------------------------------------------------------------------------------------------------------------------------------------------------------------------------------------------------------------------------------------------------------------------------------------------------------------------------------------------------------------------------------------------------------------------------------------------------------------|--------------------|--------------|------|-----|------|-----|-----|-----|-----|-----|-----|-----|---|-----|----|-----|----|-----|-----|-----|------|-----|----|-----|
| Concentration (µM) | Assay Signal |                                                                                   |       |         |        |                                                                                                                                                                                                                                                                                                                                                                                                                                                                                                                                                                                                                                                     |                    |              |      |     |      |     |     |     |     |     |     |     |   |     |    |     |    |     |     |     |      |     |    |     |
| 0.01               | 110          |                                                                                   |       |         |        |                                                                                                                                                                                                                                                                                                                                                                                                                                                                                                                                                                                                                                                     |                    |              |      |     |      |     |     |     |     |     |     |     |   |     |    |     |    |     |     |     |      |     |    |     |
| 0.05               | 140          |                                                                                   |       |         |        |                                                                                                                                                                                                                                                                                                                                                                                                                                                                                                                                                                                                                                                     |                    |              |      |     |      |     |     |     |     |     |     |     |   |     |    |     |    |     |     |     |      |     |    |     |
| 0.1                | 180          |                                                                                   |       |         |        |                                                                                                                                                                                                                                                                                                                                                                                                                                                                                                                                                                                                                                                     |                    |              |      |     |      |     |     |     |     |     |     |     |   |     |    |     |    |     |     |     |      |     |    |     |
| 0.2                | 230          |                                                                                   |       |         |        |                                                                                                                                                                                                                                                                                                                                                                                                                                                                                                                                                                                                                                                     |                    |              |      |     |      |     |     |     |     |     |     |     |   |     |    |     |    |     |     |     |      |     |    |     |
| 0.5                | 260          |                                                                                   |       |         |        |                                                                                                                                                                                                                                                                                                                                                                                                                                                                                                                                                                                                                                                     |                    |              |      |     |      |     |     |     |     |     |     |     |   |     |    |     |    |     |     |     |      |     |    |     |
| 1                  | 270          |                                                                                   |       |         |        |                                                                                                                                                                                                                                                                                                                                                                                                                                                                                                                                                                                                                                                     |                    |              |      |     |      |     |     |     |     |     |     |     |   |     |    |     |    |     |     |     |      |     |    |     |
| 2                  | 275          |                                                                                   |       |         |        |                                                                                                                                                                                                                                                                                                                                                                                                                                                                                                                                                                                                                                                     |                    |              |      |     |      |     |     |     |     |     |     |     |   |     |    |     |    |     |     |     |      |     |    |     |
| 5                  | 280          |                                                                                   |       |         |        |                                                                                                                                                                                                                                                                                                                                                                                                                                                                                                                                                                                                                                                     |                    |              |      |     |      |     |     |     |     |     |     |     |   |     |    |     |    |     |     |     |      |     |    |     |
| 10                 | 275          |                                                                                   |       |         |        |                                                                                                                                                                                                                                                                                                                                                                                                                                                                                                                                                                                                                                                     |                    |              |      |     |      |     |     |     |     |     |     |     |   |     |    |     |    |     |     |     |      |     |    |     |
| 20                 | 265          |                                                                                   |       |         |        |                                                                                                                                                                                                                                                                                                                                                                                                                                                                                                                                                                                                                                                     |                    |              |      |     |      |     |     |     |     |     |     |     |   |     |    |     |    |     |     |     |      |     |    |     |
| 50                 | 245          |                                                                                   |       |         |        |                                                                                                                                                                                                                                                                                                                                                                                                                                                                                                                                                                                                                                                     |                    |              |      |     |      |     |     |     |     |     |     |     |   |     |    |     |    |     |     |     |      |     |    |     |
| 237                | P09960       |  | 6.789 | -0.8651 | 0.9864 |  <table border="1"> <caption>Approximate data points for P09960</caption> <thead> <tr> <th>Concentration (µM)</th> <th>Assay Signal</th> </tr> </thead> <tbody> <tr><td>0.01</td><td>180</td></tr> <tr><td>0.05</td><td>170</td></tr> <tr><td>0.1</td><td>155</td></tr> <tr><td>0.5</td><td>150</td></tr> <tr><td>1</td><td>145</td></tr> <tr><td>5</td><td>75</td></tr> <tr><td>10</td><td>50</td></tr> <tr><td>50</td><td>15</td></tr> <tr><td>100</td><td>10</td></tr> <tr><td>1000</td><td>5</td></tr> </tbody> </table>                                    | Concentration (µM) | Assay Signal | 0.01 | 180 | 0.05 | 170 | 0.1 | 155 | 0.5 | 150 | 1   | 145 | 5 | 75  | 10 | 50  | 50 | 15  | 100 | 10  | 1000 | 5   |    |     |
| Concentration (µM) | Assay Signal |                                                                                   |       |         |        |                                                                                                                                                                                                                                                                                                                                                                                                                                                                                                                                                                                                                                                     |                    |              |      |     |      |     |     |     |     |     |     |     |   |     |    |     |    |     |     |     |      |     |    |     |
| 0.01               | 180          |                                                                                   |       |         |        |                                                                                                                                                                                                                                                                                                                                                                                                                                                                                                                                                                                                                                                     |                    |              |      |     |      |     |     |     |     |     |     |     |   |     |    |     |    |     |     |     |      |     |    |     |
| 0.05               | 170          |                                                                                   |       |         |        |                                                                                                                                                                                                                                                                                                                                                                                                                                                                                                                                                                                                                                                     |                    |              |      |     |      |     |     |     |     |     |     |     |   |     |    |     |    |     |     |     |      |     |    |     |
| 0.1                | 155          |                                                                                   |       |         |        |                                                                                                                                                                                                                                                                                                                                                                                                                                                                                                                                                                                                                                                     |                    |              |      |     |      |     |     |     |     |     |     |     |   |     |    |     |    |     |     |     |      |     |    |     |
| 0.5                | 150          |                                                                                   |       |         |        |                                                                                                                                                                                                                                                                                                                                                                                                                                                                                                                                                                                                                                                     |                    |              |      |     |      |     |     |     |     |     |     |     |   |     |    |     |    |     |     |     |      |     |    |     |
| 1                  | 145          |                                                                                   |       |         |        |                                                                                                                                                                                                                                                                                                                                                                                                                                                                                                                                                                                                                                                     |                    |              |      |     |      |     |     |     |     |     |     |     |   |     |    |     |    |     |     |     |      |     |    |     |
| 5                  | 75           |                                                                                   |       |         |        |                                                                                                                                                                                                                                                                                                                                                                                                                                                                                                                                                                                                                                                     |                    |              |      |     |      |     |     |     |     |     |     |     |   |     |    |     |    |     |     |     |      |     |    |     |
| 10                 | 50           |                                                                                   |       |         |        |                                                                                                                                                                                                                                                                                                                                                                                                                                                                                                                                                                                                                                                     |                    |              |      |     |      |     |     |     |     |     |     |     |   |     |    |     |    |     |     |     |      |     |    |     |
| 50                 | 15           |                                                                                   |       |         |        |                                                                                                                                                                                                                                                                                                                                                                                                                                                                                                                                                                                                                                                     |                    |              |      |     |      |     |     |     |     |     |     |     |   |     |    |     |    |     |     |     |      |     |    |     |
| 100                | 10           |                                                                                   |       |         |        |                                                                                                                                                                                                                                                                                                                                                                                                                                                                                                                                                                                                                                                     |                    |              |      |     |      |     |     |     |     |     |     |     |   |     |    |     |    |     |     |     |      |     |    |     |
| 1000               | 5            |                                                                                   |       |         |        |                                                                                                                                                                                                                                                                                                                                                                                                                                                                                                                                                                                                                                                     |                    |              |      |     |      |     |     |     |     |     |     |     |   |     |    |     |    |     |     |     |      |     |    |     |

|     |        |                                                                                   |       |        |        |                                                                                      |
|-----|--------|-----------------------------------------------------------------------------------|-------|--------|--------|--------------------------------------------------------------------------------------|
| 240 | P12883 | 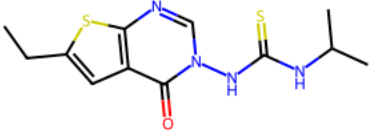 | 20.87 | -1.015 | 0.9149 |   |
| 242 | Q16526 |  | 122.2 | -1.193 | 0.9964 |  |

|     |                   |                                                                                    |        |         |        |                                                                                      |
|-----|-------------------|------------------------------------------------------------------------------------|--------|---------|--------|--------------------------------------------------------------------------------------|
| 243 | O00522,Q9UL<br>I3 | 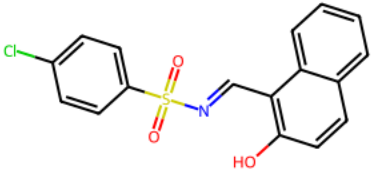  | 862.5  | -0.7202 | 0.9399 |   |
| 248 | O00429            |  | 261.6* | -       | 0.9048 |  |

| 251                | Q16548       | 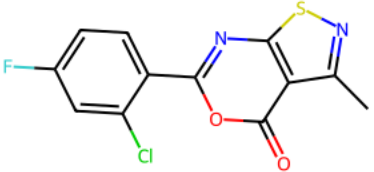 | 117.2 | -2.874 | 0.9984 |  <table border="1"> <caption>Approximate data for Q16548</caption> <thead> <tr> <th>Concentration (µM)</th> <th>Assay Signal</th> </tr> </thead> <tbody> <tr><td>3</td><td>100</td></tr> <tr><td>6</td><td>98</td></tr> <tr><td>12</td><td>102</td></tr> <tr><td>24</td><td>98</td></tr> <tr><td>48</td><td>92</td></tr> <tr><td>96</td><td>65</td></tr> <tr><td>192</td><td>25</td></tr> <tr><td>384</td><td>12</td></tr> </tbody> </table>                                                                                                                                                                                                                | Concentration (µM) | Assay Signal | 3     | 100   | 6    | 98    | 12   | 102   | 24   | 98    | 48  | 92    | 96  | 65    | 192 | 25    | 384 | 12    |   |       |   |       |    |       |    |       |    |       |
|--------------------|--------------|-----------------------------------------------------------------------------------|-------|--------|--------|------------------------------------------------------------------------------------------------------------------------------------------------------------------------------------------------------------------------------------------------------------------------------------------------------------------------------------------------------------------------------------------------------------------------------------------------------------------------------------------------------------------------------------------------------------------------------------------------------------------------------------------------------------------------------------------------------------------------------------------------|--------------------|--------------|-------|-------|------|-------|------|-------|------|-------|-----|-------|-----|-------|-----|-------|-----|-------|---|-------|---|-------|----|-------|----|-------|----|-------|
| Concentration (µM) | Assay Signal |                                                                                   |       |        |        |                                                                                                                                                                                                                                                                                                                                                                                                                                                                                                                                                                                                                                                                                                                                                |                    |              |       |       |      |       |      |       |      |       |     |       |     |       |     |       |     |       |   |       |   |       |    |       |    |       |    |       |
| 3                  | 100          |                                                                                   |       |        |        |                                                                                                                                                                                                                                                                                                                                                                                                                                                                                                                                                                                                                                                                                                                                                |                    |              |       |       |      |       |      |       |      |       |     |       |     |       |     |       |     |       |   |       |   |       |    |       |    |       |    |       |
| 6                  | 98           |                                                                                   |       |        |        |                                                                                                                                                                                                                                                                                                                                                                                                                                                                                                                                                                                                                                                                                                                                                |                    |              |       |       |      |       |      |       |      |       |     |       |     |       |     |       |     |       |   |       |   |       |    |       |    |       |    |       |
| 12                 | 102          |                                                                                   |       |        |        |                                                                                                                                                                                                                                                                                                                                                                                                                                                                                                                                                                                                                                                                                                                                                |                    |              |       |       |      |       |      |       |      |       |     |       |     |       |     |       |     |       |   |       |   |       |    |       |    |       |    |       |
| 24                 | 98           |                                                                                   |       |        |        |                                                                                                                                                                                                                                                                                                                                                                                                                                                                                                                                                                                                                                                                                                                                                |                    |              |       |       |      |       |      |       |      |       |     |       |     |       |     |       |     |       |   |       |   |       |    |       |    |       |    |       |
| 48                 | 92           |                                                                                   |       |        |        |                                                                                                                                                                                                                                                                                                                                                                                                                                                                                                                                                                                                                                                                                                                                                |                    |              |       |       |      |       |      |       |      |       |     |       |     |       |     |       |     |       |   |       |   |       |    |       |    |       |    |       |
| 96                 | 65           |                                                                                   |       |        |        |                                                                                                                                                                                                                                                                                                                                                                                                                                                                                                                                                                                                                                                                                                                                                |                    |              |       |       |      |       |      |       |      |       |     |       |     |       |     |       |     |       |   |       |   |       |    |       |    |       |    |       |
| 192                | 25           |                                                                                   |       |        |        |                                                                                                                                                                                                                                                                                                                                                                                                                                                                                                                                                                                                                                                                                                                                                |                    |              |       |       |      |       |      |       |      |       |     |       |     |       |     |       |     |       |   |       |   |       |    |       |    |       |    |       |
| 384                | 12           |                                                                                   |       |        |        |                                                                                                                                                                                                                                                                                                                                                                                                                                                                                                                                                                                                                                                                                                                                                |                    |              |       |       |      |       |      |       |      |       |     |       |     |       |     |       |     |       |   |       |   |       |    |       |    |       |    |       |
| 255                | P16220       |  | 14.26 | 1.335  | 0.9542 |  <table border="1"> <caption>Approximate data for P16220</caption> <thead> <tr> <th>Concentration (µM)</th> <th>Assay Signal</th> </tr> </thead> <tbody> <tr><td>0.005</td><td>45000</td></tr> <tr><td>0.01</td><td>45000</td></tr> <tr><td>0.02</td><td>45000</td></tr> <tr><td>0.05</td><td>45000</td></tr> <tr><td>0.1</td><td>45000</td></tr> <tr><td>0.2</td><td>45000</td></tr> <tr><td>0.5</td><td>45000</td></tr> <tr><td>1</td><td>45000</td></tr> <tr><td>2</td><td>55000</td></tr> <tr><td>5</td><td>65000</td></tr> <tr><td>10</td><td>85000</td></tr> <tr><td>20</td><td>95000</td></tr> <tr><td>50</td><td>95000</td></tr> </tbody> </table> | Concentration (µM) | Assay Signal | 0.005 | 45000 | 0.01 | 45000 | 0.02 | 45000 | 0.05 | 45000 | 0.1 | 45000 | 0.2 | 45000 | 0.5 | 45000 | 1   | 45000 | 2 | 55000 | 5 | 65000 | 10 | 85000 | 20 | 95000 | 50 | 95000 |
| Concentration (µM) | Assay Signal |                                                                                   |       |        |        |                                                                                                                                                                                                                                                                                                                                                                                                                                                                                                                                                                                                                                                                                                                                                |                    |              |       |       |      |       |      |       |      |       |     |       |     |       |     |       |     |       |   |       |   |       |    |       |    |       |    |       |
| 0.005              | 45000        |                                                                                   |       |        |        |                                                                                                                                                                                                                                                                                                                                                                                                                                                                                                                                                                                                                                                                                                                                                |                    |              |       |       |      |       |      |       |      |       |     |       |     |       |     |       |     |       |   |       |   |       |    |       |    |       |    |       |
| 0.01               | 45000        |                                                                                   |       |        |        |                                                                                                                                                                                                                                                                                                                                                                                                                                                                                                                                                                                                                                                                                                                                                |                    |              |       |       |      |       |      |       |      |       |     |       |     |       |     |       |     |       |   |       |   |       |    |       |    |       |    |       |
| 0.02               | 45000        |                                                                                   |       |        |        |                                                                                                                                                                                                                                                                                                                                                                                                                                                                                                                                                                                                                                                                                                                                                |                    |              |       |       |      |       |      |       |      |       |     |       |     |       |     |       |     |       |   |       |   |       |    |       |    |       |    |       |
| 0.05               | 45000        |                                                                                   |       |        |        |                                                                                                                                                                                                                                                                                                                                                                                                                                                                                                                                                                                                                                                                                                                                                |                    |              |       |       |      |       |      |       |      |       |     |       |     |       |     |       |     |       |   |       |   |       |    |       |    |       |    |       |
| 0.1                | 45000        |                                                                                   |       |        |        |                                                                                                                                                                                                                                                                                                                                                                                                                                                                                                                                                                                                                                                                                                                                                |                    |              |       |       |      |       |      |       |      |       |     |       |     |       |     |       |     |       |   |       |   |       |    |       |    |       |    |       |
| 0.2                | 45000        |                                                                                   |       |        |        |                                                                                                                                                                                                                                                                                                                                                                                                                                                                                                                                                                                                                                                                                                                                                |                    |              |       |       |      |       |      |       |      |       |     |       |     |       |     |       |     |       |   |       |   |       |    |       |    |       |    |       |
| 0.5                | 45000        |                                                                                   |       |        |        |                                                                                                                                                                                                                                                                                                                                                                                                                                                                                                                                                                                                                                                                                                                                                |                    |              |       |       |      |       |      |       |      |       |     |       |     |       |     |       |     |       |   |       |   |       |    |       |    |       |    |       |
| 1                  | 45000        |                                                                                   |       |        |        |                                                                                                                                                                                                                                                                                                                                                                                                                                                                                                                                                                                                                                                                                                                                                |                    |              |       |       |      |       |      |       |      |       |     |       |     |       |     |       |     |       |   |       |   |       |    |       |    |       |    |       |
| 2                  | 55000        |                                                                                   |       |        |        |                                                                                                                                                                                                                                                                                                                                                                                                                                                                                                                                                                                                                                                                                                                                                |                    |              |       |       |      |       |      |       |      |       |     |       |     |       |     |       |     |       |   |       |   |       |    |       |    |       |    |       |
| 5                  | 65000        |                                                                                   |       |        |        |                                                                                                                                                                                                                                                                                                                                                                                                                                                                                                                                                                                                                                                                                                                                                |                    |              |       |       |      |       |      |       |      |       |     |       |     |       |     |       |     |       |   |       |   |       |    |       |    |       |    |       |
| 10                 | 85000        |                                                                                   |       |        |        |                                                                                                                                                                                                                                                                                                                                                                                                                                                                                                                                                                                                                                                                                                                                                |                    |              |       |       |      |       |      |       |      |       |     |       |     |       |     |       |     |       |   |       |   |       |    |       |    |       |    |       |
| 20                 | 95000        |                                                                                   |       |        |        |                                                                                                                                                                                                                                                                                                                                                                                                                                                                                                                                                                                                                                                                                                                                                |                    |              |       |       |      |       |      |       |      |       |     |       |     |       |     |       |     |       |   |       |   |       |    |       |    |       |    |       |
| 50                 | 95000        |                                                                                   |       |        |        |                                                                                                                                                                                                                                                                                                                                                                                                                                                                                                                                                                                                                                                                                                                                                |                    |              |       |       |      |       |      |       |      |       |     |       |     |       |     |       |     |       |   |       |   |       |    |       |    |       |    |       |

|     |               |                                                                                   |       |         |        |                                                                                      |
|-----|---------------|-----------------------------------------------------------------------------------|-------|---------|--------|--------------------------------------------------------------------------------------|
| 258 | O14924,O43566 |  | 64.17 | -0.9562 | 0.9863 |   |
| 261 | Q9Y251        |  | 71.29 | 2.296   | 0.979  |  |

| 262                | Q9H255       | 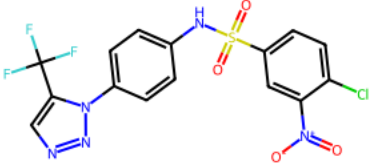 | 12.99 | -1.719 | 0.8538 |  <table border="1"> <caption>Approximate data points for Q9H255</caption> <thead> <tr> <th>Concentration (µM)</th> <th>Assay Signal</th> </tr> </thead> <tbody> <tr><td>0.001</td><td>0.95</td></tr> <tr><td>0.002</td><td>1.00</td></tr> <tr><td>0.005</td><td>0.85</td></tr> <tr><td>0.01</td><td>0.85</td></tr> <tr><td>0.02</td><td>0.75</td></tr> <tr><td>0.05</td><td>0.88</td></tr> <tr><td>0.1</td><td>0.75</td></tr> <tr><td>0.2</td><td>0.85</td></tr> <tr><td>0.5</td><td>0.85</td></tr> <tr><td>1</td><td>0.55</td></tr> <tr><td>2</td><td>0.25</td></tr> <tr><td>5</td><td>0.10</td></tr> </tbody> </table> | Concentration (µM) | Assay Signal | 0.001 | 0.95 | 0.002 | 1.00 | 0.005 | 0.85 | 0.01 | 0.85 | 0.02 | 0.75 | 0.05 | 0.88 | 0.1 | 0.75 | 0.2 | 0.85 | 0.5 | 0.85 | 1 | 0.55 | 2 | 0.25 | 5 | 0.10 |
|--------------------|--------------|-----------------------------------------------------------------------------------|-------|--------|--------|-------------------------------------------------------------------------------------------------------------------------------------------------------------------------------------------------------------------------------------------------------------------------------------------------------------------------------------------------------------------------------------------------------------------------------------------------------------------------------------------------------------------------------------------------------------------------------------------------------------------------------------------------------------------------------------------------------------|--------------------|--------------|-------|------|-------|------|-------|------|------|------|------|------|------|------|-----|------|-----|------|-----|------|---|------|---|------|---|------|
| Concentration (µM) | Assay Signal |                                                                                   |       |        |        |                                                                                                                                                                                                                                                                                                                                                                                                                                                                                                                                                                                                                                                                                                             |                    |              |       |      |       |      |       |      |      |      |      |      |      |      |     |      |     |      |     |      |   |      |   |      |   |      |
| 0.001              | 0.95         |                                                                                   |       |        |        |                                                                                                                                                                                                                                                                                                                                                                                                                                                                                                                                                                                                                                                                                                             |                    |              |       |      |       |      |       |      |      |      |      |      |      |      |     |      |     |      |     |      |   |      |   |      |   |      |
| 0.002              | 1.00         |                                                                                   |       |        |        |                                                                                                                                                                                                                                                                                                                                                                                                                                                                                                                                                                                                                                                                                                             |                    |              |       |      |       |      |       |      |      |      |      |      |      |      |     |      |     |      |     |      |   |      |   |      |   |      |
| 0.005              | 0.85         |                                                                                   |       |        |        |                                                                                                                                                                                                                                                                                                                                                                                                                                                                                                                                                                                                                                                                                                             |                    |              |       |      |       |      |       |      |      |      |      |      |      |      |     |      |     |      |     |      |   |      |   |      |   |      |
| 0.01               | 0.85         |                                                                                   |       |        |        |                                                                                                                                                                                                                                                                                                                                                                                                                                                                                                                                                                                                                                                                                                             |                    |              |       |      |       |      |       |      |      |      |      |      |      |      |     |      |     |      |     |      |   |      |   |      |   |      |
| 0.02               | 0.75         |                                                                                   |       |        |        |                                                                                                                                                                                                                                                                                                                                                                                                                                                                                                                                                                                                                                                                                                             |                    |              |       |      |       |      |       |      |      |      |      |      |      |      |     |      |     |      |     |      |   |      |   |      |   |      |
| 0.05               | 0.88         |                                                                                   |       |        |        |                                                                                                                                                                                                                                                                                                                                                                                                                                                                                                                                                                                                                                                                                                             |                    |              |       |      |       |      |       |      |      |      |      |      |      |      |     |      |     |      |     |      |   |      |   |      |   |      |
| 0.1                | 0.75         |                                                                                   |       |        |        |                                                                                                                                                                                                                                                                                                                                                                                                                                                                                                                                                                                                                                                                                                             |                    |              |       |      |       |      |       |      |      |      |      |      |      |      |     |      |     |      |     |      |   |      |   |      |   |      |
| 0.2                | 0.85         |                                                                                   |       |        |        |                                                                                                                                                                                                                                                                                                                                                                                                                                                                                                                                                                                                                                                                                                             |                    |              |       |      |       |      |       |      |      |      |      |      |      |      |     |      |     |      |     |      |   |      |   |      |   |      |
| 0.5                | 0.85         |                                                                                   |       |        |        |                                                                                                                                                                                                                                                                                                                                                                                                                                                                                                                                                                                                                                                                                                             |                    |              |       |      |       |      |       |      |      |      |      |      |      |      |     |      |     |      |     |      |   |      |   |      |   |      |
| 1                  | 0.55         |                                                                                   |       |        |        |                                                                                                                                                                                                                                                                                                                                                                                                                                                                                                                                                                                                                                                                                                             |                    |              |       |      |       |      |       |      |      |      |      |      |      |      |     |      |     |      |     |      |   |      |   |      |   |      |
| 2                  | 0.25         |                                                                                   |       |        |        |                                                                                                                                                                                                                                                                                                                                                                                                                                                                                                                                                                                                                                                                                                             |                    |              |       |      |       |      |       |      |      |      |      |      |      |      |     |      |     |      |     |      |   |      |   |      |   |      |
| 5                  | 0.10         |                                                                                   |       |        |        |                                                                                                                                                                                                                                                                                                                                                                                                                                                                                                                                                                                                                                                                                                             |                    |              |       |      |       |      |       |      |      |      |      |      |      |      |     |      |     |      |     |      |   |      |   |      |   |      |
| 264                | Q04206       |  | 2.982 | 1.307  | 0.9714 |  <table border="1"> <caption>Approximate data points for Q04206</caption> <thead> <tr> <th>Concentration (µM)</th> <th>Assay Signal</th> </tr> </thead> <tbody> <tr><td>0.05</td><td>5</td></tr> <tr><td>0.1</td><td>10</td></tr> <tr><td>0.2</td><td>15</td></tr> <tr><td>0.5</td><td>25</td></tr> <tr><td>1</td><td>40</td></tr> <tr><td>2</td><td>55</td></tr> <tr><td>5</td><td>65</td></tr> <tr><td>10</td><td>75</td></tr> <tr><td>20</td><td>80</td></tr> </tbody> </table>                                                                                                                                      | Concentration (µM) | Assay Signal | 0.05  | 5    | 0.1   | 10   | 0.2   | 15   | 0.5  | 25   | 1    | 40   | 2    | 55   | 5   | 65   | 10  | 75   | 20  | 80   |   |      |   |      |   |      |
| Concentration (µM) | Assay Signal |                                                                                   |       |        |        |                                                                                                                                                                                                                                                                                                                                                                                                                                                                                                                                                                                                                                                                                                             |                    |              |       |      |       |      |       |      |      |      |      |      |      |      |     |      |     |      |     |      |   |      |   |      |   |      |
| 0.05               | 5            |                                                                                   |       |        |        |                                                                                                                                                                                                                                                                                                                                                                                                                                                                                                                                                                                                                                                                                                             |                    |              |       |      |       |      |       |      |      |      |      |      |      |      |     |      |     |      |     |      |   |      |   |      |   |      |
| 0.1                | 10           |                                                                                   |       |        |        |                                                                                                                                                                                                                                                                                                                                                                                                                                                                                                                                                                                                                                                                                                             |                    |              |       |      |       |      |       |      |      |      |      |      |      |      |     |      |     |      |     |      |   |      |   |      |   |      |
| 0.2                | 15           |                                                                                   |       |        |        |                                                                                                                                                                                                                                                                                                                                                                                                                                                                                                                                                                                                                                                                                                             |                    |              |       |      |       |      |       |      |      |      |      |      |      |      |     |      |     |      |     |      |   |      |   |      |   |      |
| 0.5                | 25           |                                                                                   |       |        |        |                                                                                                                                                                                                                                                                                                                                                                                                                                                                                                                                                                                                                                                                                                             |                    |              |       |      |       |      |       |      |      |      |      |      |      |      |     |      |     |      |     |      |   |      |   |      |   |      |
| 1                  | 40           |                                                                                   |       |        |        |                                                                                                                                                                                                                                                                                                                                                                                                                                                                                                                                                                                                                                                                                                             |                    |              |       |      |       |      |       |      |      |      |      |      |      |      |     |      |     |      |     |      |   |      |   |      |   |      |
| 2                  | 55           |                                                                                   |       |        |        |                                                                                                                                                                                                                                                                                                                                                                                                                                                                                                                                                                                                                                                                                                             |                    |              |       |      |       |      |       |      |      |      |      |      |      |      |     |      |     |      |     |      |   |      |   |      |   |      |
| 5                  | 65           |                                                                                   |       |        |        |                                                                                                                                                                                                                                                                                                                                                                                                                                                                                                                                                                                                                                                                                                             |                    |              |       |      |       |      |       |      |      |      |      |      |      |      |     |      |     |      |     |      |   |      |   |      |   |      |
| 10                 | 75           |                                                                                   |       |        |        |                                                                                                                                                                                                                                                                                                                                                                                                                                                                                                                                                                                                                                                                                                             |                    |              |       |      |       |      |       |      |      |      |      |      |      |      |     |      |     |      |     |      |   |      |   |      |   |      |
| 20                 | 80           |                                                                                   |       |        |        |                                                                                                                                                                                                                                                                                                                                                                                                                                                                                                                                                                                                                                                                                                             |                    |              |       |      |       |      |       |      |      |      |      |      |      |      |     |      |     |      |     |      |   |      |   |      |   |      |

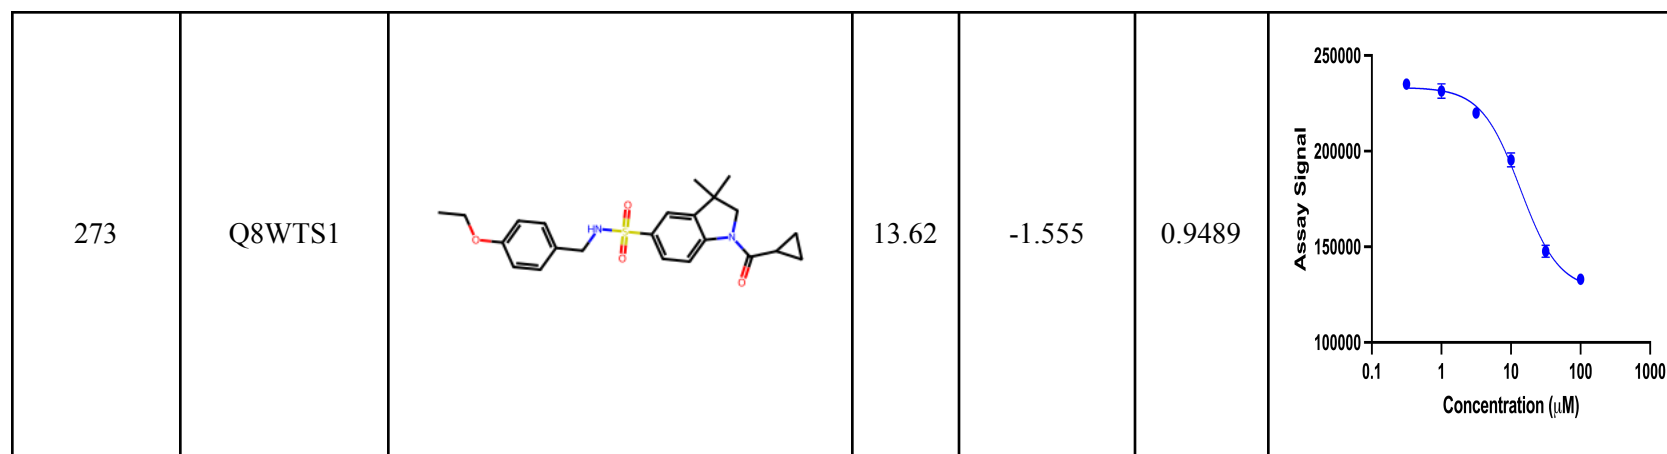

**Supplementary Table 6** Dose-response curves of a representative bioactive compound for each of the projects that were followed up with positive dose-response experiments. All dose response data were plotted and analyzed using Prism 9.4.1 from GraphPad. Data (IC<sub>50</sub>/EC<sub>50</sub>) were fit using variable slope (four parameter) fits, and plotted as log[inhibitor] (µM) vs response. All K<sub>d</sub> data were fit using One Site – Total (saturation) fits and plotted as log[inhibitor] (µM) vs response. “\*” indicates K<sub>d</sub> rather than IC<sub>50</sub>.

| Project ID | UniProt ID | Research Area       | # of hits advanced to analog expansion | # hits validated | # analogs validated | Potency range (IC <sub>50</sub> /K <sub>i</sub> , µM) | Units            |
|------------|------------|---------------------|----------------------------------------|------------------|---------------------|-------------------------------------------------------|------------------|
| 056        | Q66479     | Infectious Diseases | 2                                      | 0                | 0                   | -                                                     | IC <sub>50</sub> |
| 057        | O96693     | Infectious Diseases | 5                                      | 2                | 10                  | 3.42 - 13.83                                          | IC <sub>50</sub> |
| 062        | P31350     | Oncology            | 3                                      | 2                | 9                   | 3 - 40                                                | IC <sub>50</sub> |



|     |                    |                                                                  |   |   |    |               |       |
|-----|--------------------|------------------------------------------------------------------|---|---|----|---------------|-------|
| 080 | Q07812             | Neurotoxicity,<br>cardiotoxicity,<br>Alzheimer's<br>Disease. ALS | 4 | 2 | 6  | -             | Other |
| 120 | P05121             | Rheumatology                                                     | 5 | 2 | 7  | 89.12 - 626.8 | IC50  |
| 126 | Q96LB1             | Immunology                                                       | 1 | 1 | 6  | 5.9 - 78.9    | IC50  |
| 141 | P31483             | Neurology                                                        | 1 | 0 | 0  | -             | IC50  |
| 144 | P34913             | Neurology                                                        | 3 | 2 | 12 | 0.004 - 0.068 | IC50  |
| 158 | P9WNM7             | Infectious<br>Diseases                                           | 3 | 3 | 31 | 1 - 23        | IC50  |
| 159 | I6Y9J2             | Infectious<br>Diseases                                           | 3 | 2 | 17 | 4.3 - 30.3    | MIC   |
| 166 | P68133             | Oncology                                                         | 1 | 0 | 0  | -             | Other |
| 182 | Q9BZS1 /<br>Q13469 | Immunology                                                       | 3 | 2 | 15 | 1.053 - 8.263 | IC50  |
| 198 | P47895             | Oncology                                                         | 4 | 3 | 3  | 0.25 - 1.9    | IC50  |
| 222 | O15294             | Oncology                                                         | 2 | 2 | 5  | 15 - 38       | IC50  |
| 227 | P0C8L0             | Infectious<br>Diseases                                           | 1 | 1 | 3  | 10 - 80       | IC50  |
| 243 | O00522             | Cardiology and<br>Vascular<br>Diseases                           | 1 | 0 | 0  | -             | IC50  |
| 252 | Q92793             | Oncology                                                         | 6 | 3 | 14 | 0.3 - 78.6    | IC50  |

|     |        |                             |   |   |    |            |      |
|-----|--------|-----------------------------|---|---|----|------------|------|
| 254 | O95786 | Infectious Diseases         | 2 | 1 | 1  | 0.083      | IC50 |
| 258 | O14924 | Pain                        | 2 | 2 | 13 | 10 - 104   | IC50 |
| 267 | P0DTC2 | Infectious Diseases         | 1 | 0 | 0  | -          | IC50 |
| 276 | Q8N9F0 | Rare Diseases and Disorders | 5 | 3 | 8  | 1.61 - 5.1 | Ki   |

---

**Supplementary Table 7.** Dose-response results from the analog expansion for 21 AIMS projects in the AIMS-validation follow up studies. In addition to establishing dose-responsive behavior, additional measurable activities of analogous compounds further validate the primary hits.

| Compound ID | Identified hit                                                                     | Hit potency (Kd, nM) | Nearest Neighbor (NN)                                                                | NN Similarity (ECFP4, Tanimoto) | NN potency (Kd/IC50,nM) |
|-------------|------------------------------------------------------------------------------------|----------------------|--------------------------------------------------------------------------------------|---------------------------------|-------------------------|
| LATS1_HID_1 | 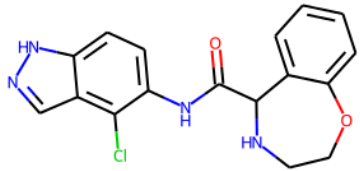  | 77                   |   | 0.23                            | 10000.0                 |
| LATS1_HID_2 |  | 86                   |  | 0.29                            | 10000.0                 |

|             |                                                                                   |     |                                                                                     |      |        |
|-------------|-----------------------------------------------------------------------------------|-----|-------------------------------------------------------------------------------------|------|--------|
| LATS1_HID_3 | 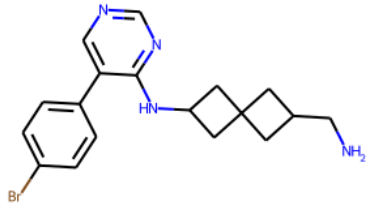 | 120 |  | 0.23 | 105.7  |
| LATS1_HID_4 |  | 130 |  | 0.25 | 2691.5 |

|             |                                                                                   |     |                                                                                     |      |         |
|-------------|-----------------------------------------------------------------------------------|-----|-------------------------------------------------------------------------------------|------|---------|
| LATS1_HID_5 | 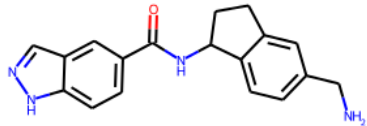 | 210 |  | 0.26 | 14.0    |
| LATS1_HID_6 |  | 290 |  | 0.31 | 10000.0 |

|             |                                                                                   |     |                                                                                     |      |         |
|-------------|-----------------------------------------------------------------------------------|-----|-------------------------------------------------------------------------------------|------|---------|
| LATS1_HID_7 | 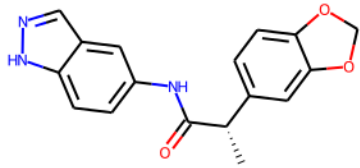 | 360 |  | 0.30 | 14.0    |
| LATS1_HID_8 |  | 400 |  | 0.32 | 10000.0 |

|              |                                                                                   |     |                                                                                     |      |       |
|--------------|-----------------------------------------------------------------------------------|-----|-------------------------------------------------------------------------------------|------|-------|
| LATS1_HID_9  | 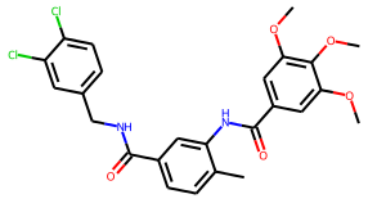 | 460 |  | 0.23 | 251.2 |
| LATS1_HID_10 |  | 560 |  | 0.30 | 4.0   |

**Supplementary Table 8.** Top 10 active compounds identified for LATS1 in the hit-identification screen. 16 billion Enamine REAL compounds were screened with the AtomNet® model and 418 top-scoring diverse scaffolds were selected for testing in a KinomeScan binding assay. Of the 76 compounds with more than 50% inhibition at 30µM, 75 showed dose-responsive behavior ranging from 0.077µM to 82µM (KinomeScan binding assay). Most similar LATS1 compounds in the Atomwise database for each of the compounds are shown. The similarity between hits and database compounds (NN) is based on the Tanimoto similarity and ECFP4 fingerprints. NN Potencies are the median activities in the Atomwise database.

| Compound ID                     | IC50 / Kd ( $\mu\text{M}$ ) | Hill Slope | $R^2$  | Dose-response curve                                                                                                                                                                                                                                                                                                                                                                                                                                                                                                                                                                                                                                                                                                                                                                                                                                                                                                                                                                                                                                                                                                                                                                                                                                                                                                                                                                                                                                                                                                                                                                                                                                                                                                                                                                                                                                                                                                               |                                 |                         |       |                      |       |                      |       |                      |      |                      |      |                      |      |                      |     |                      |     |                      |     |                      |   |                      |   |                      |   |                      |    |                      |    |                      |    |                      |     |                      |
|---------------------------------|-----------------------------|------------|--------|-----------------------------------------------------------------------------------------------------------------------------------------------------------------------------------------------------------------------------------------------------------------------------------------------------------------------------------------------------------------------------------------------------------------------------------------------------------------------------------------------------------------------------------------------------------------------------------------------------------------------------------------------------------------------------------------------------------------------------------------------------------------------------------------------------------------------------------------------------------------------------------------------------------------------------------------------------------------------------------------------------------------------------------------------------------------------------------------------------------------------------------------------------------------------------------------------------------------------------------------------------------------------------------------------------------------------------------------------------------------------------------------------------------------------------------------------------------------------------------------------------------------------------------------------------------------------------------------------------------------------------------------------------------------------------------------------------------------------------------------------------------------------------------------------------------------------------------------------------------------------------------------------------------------------------------|---------------------------------|-------------------------|-------|----------------------|-------|----------------------|-------|----------------------|------|----------------------|------|----------------------|------|----------------------|-----|----------------------|-----|----------------------|-----|----------------------|---|----------------------|---|----------------------|---|----------------------|----|----------------------|----|----------------------|----|----------------------|-----|----------------------|
| LATS1_HID_1                     | 0.08381                     | -1.2020    | 0.9872 | 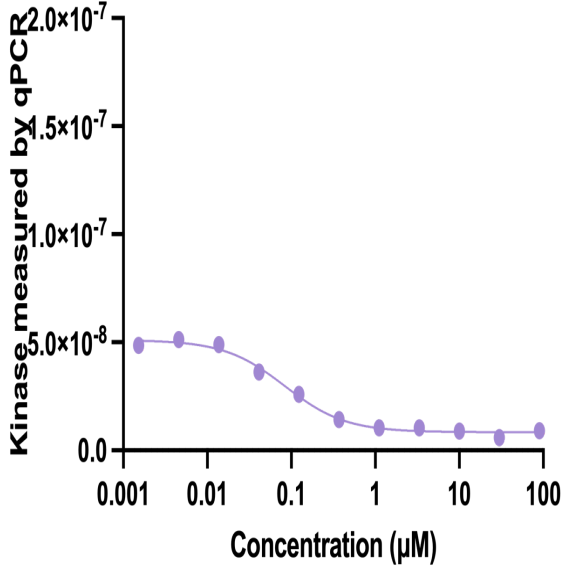 <p>The graph displays a sigmoidal dose-response curve. The y-axis, labeled 'Kinase measured by qPCR', ranges from 0.0 to <math>2.0 \times 10^{-7}</math>. The x-axis, labeled 'Concentration (<math>\mu\text{M}</math>)', is on a logarithmic scale from 0.001 to 100. The data points, represented by purple circles connected by a line, show a decrease in kinase activity as the concentration of the compound increases. The curve starts at approximately <math>5.0 \times 10^{-8}</math> at 0.001 <math>\mu\text{M}</math> and reaches a plateau near 0.0 at 100 <math>\mu\text{M}</math>.</p> <table border="1"><caption>Estimated data points from the dose-response curve</caption><thead><tr><th>Concentration (<math>\mu\text{M}</math>)</th><th>Kinase measured by qPCR</th></tr></thead><tbody><tr><td>0.001</td><td><math>5.0 \times 10^{-8}</math></td></tr><tr><td>0.002</td><td><math>5.2 \times 10^{-8}</math></td></tr><tr><td>0.005</td><td><math>5.0 \times 10^{-8}</math></td></tr><tr><td>0.01</td><td><math>4.8 \times 10^{-8}</math></td></tr><tr><td>0.02</td><td><math>4.0 \times 10^{-8}</math></td></tr><tr><td>0.05</td><td><math>3.0 \times 10^{-8}</math></td></tr><tr><td>0.1</td><td><math>2.5 \times 10^{-8}</math></td></tr><tr><td>0.2</td><td><math>1.8 \times 10^{-8}</math></td></tr><tr><td>0.5</td><td><math>1.2 \times 10^{-8}</math></td></tr><tr><td>1</td><td><math>1.0 \times 10^{-8}</math></td></tr><tr><td>2</td><td><math>0.8 \times 10^{-8}</math></td></tr><tr><td>5</td><td><math>0.7 \times 10^{-8}</math></td></tr><tr><td>10</td><td><math>0.6 \times 10^{-8}</math></td></tr><tr><td>20</td><td><math>0.5 \times 10^{-8}</math></td></tr><tr><td>50</td><td><math>0.5 \times 10^{-8}</math></td></tr><tr><td>100</td><td><math>0.5 \times 10^{-8}</math></td></tr></tbody></table> | Concentration ( $\mu\text{M}$ ) | Kinase measured by qPCR | 0.001 | $5.0 \times 10^{-8}$ | 0.002 | $5.2 \times 10^{-8}$ | 0.005 | $5.0 \times 10^{-8}$ | 0.01 | $4.8 \times 10^{-8}$ | 0.02 | $4.0 \times 10^{-8}$ | 0.05 | $3.0 \times 10^{-8}$ | 0.1 | $2.5 \times 10^{-8}$ | 0.2 | $1.8 \times 10^{-8}$ | 0.5 | $1.2 \times 10^{-8}$ | 1 | $1.0 \times 10^{-8}$ | 2 | $0.8 \times 10^{-8}$ | 5 | $0.7 \times 10^{-8}$ | 10 | $0.6 \times 10^{-8}$ | 20 | $0.5 \times 10^{-8}$ | 50 | $0.5 \times 10^{-8}$ | 100 | $0.5 \times 10^{-8}$ |
| Concentration ( $\mu\text{M}$ ) | Kinase measured by qPCR     |            |        |                                                                                                                                                                                                                                                                                                                                                                                                                                                                                                                                                                                                                                                                                                                                                                                                                                                                                                                                                                                                                                                                                                                                                                                                                                                                                                                                                                                                                                                                                                                                                                                                                                                                                                                                                                                                                                                                                                                                   |                                 |                         |       |                      |       |                      |       |                      |      |                      |      |                      |      |                      |     |                      |     |                      |     |                      |   |                      |   |                      |   |                      |    |                      |    |                      |    |                      |     |                      |
| 0.001                           | $5.0 \times 10^{-8}$        |            |        |                                                                                                                                                                                                                                                                                                                                                                                                                                                                                                                                                                                                                                                                                                                                                                                                                                                                                                                                                                                                                                                                                                                                                                                                                                                                                                                                                                                                                                                                                                                                                                                                                                                                                                                                                                                                                                                                                                                                   |                                 |                         |       |                      |       |                      |       |                      |      |                      |      |                      |      |                      |     |                      |     |                      |     |                      |   |                      |   |                      |   |                      |    |                      |    |                      |    |                      |     |                      |
| 0.002                           | $5.2 \times 10^{-8}$        |            |        |                                                                                                                                                                                                                                                                                                                                                                                                                                                                                                                                                                                                                                                                                                                                                                                                                                                                                                                                                                                                                                                                                                                                                                                                                                                                                                                                                                                                                                                                                                                                                                                                                                                                                                                                                                                                                                                                                                                                   |                                 |                         |       |                      |       |                      |       |                      |      |                      |      |                      |      |                      |     |                      |     |                      |     |                      |   |                      |   |                      |   |                      |    |                      |    |                      |    |                      |     |                      |
| 0.005                           | $5.0 \times 10^{-8}$        |            |        |                                                                                                                                                                                                                                                                                                                                                                                                                                                                                                                                                                                                                                                                                                                                                                                                                                                                                                                                                                                                                                                                                                                                                                                                                                                                                                                                                                                                                                                                                                                                                                                                                                                                                                                                                                                                                                                                                                                                   |                                 |                         |       |                      |       |                      |       |                      |      |                      |      |                      |      |                      |     |                      |     |                      |     |                      |   |                      |   |                      |   |                      |    |                      |    |                      |    |                      |     |                      |
| 0.01                            | $4.8 \times 10^{-8}$        |            |        |                                                                                                                                                                                                                                                                                                                                                                                                                                                                                                                                                                                                                                                                                                                                                                                                                                                                                                                                                                                                                                                                                                                                                                                                                                                                                                                                                                                                                                                                                                                                                                                                                                                                                                                                                                                                                                                                                                                                   |                                 |                         |       |                      |       |                      |       |                      |      |                      |      |                      |      |                      |     |                      |     |                      |     |                      |   |                      |   |                      |   |                      |    |                      |    |                      |    |                      |     |                      |
| 0.02                            | $4.0 \times 10^{-8}$        |            |        |                                                                                                                                                                                                                                                                                                                                                                                                                                                                                                                                                                                                                                                                                                                                                                                                                                                                                                                                                                                                                                                                                                                                                                                                                                                                                                                                                                                                                                                                                                                                                                                                                                                                                                                                                                                                                                                                                                                                   |                                 |                         |       |                      |       |                      |       |                      |      |                      |      |                      |      |                      |     |                      |     |                      |     |                      |   |                      |   |                      |   |                      |    |                      |    |                      |    |                      |     |                      |
| 0.05                            | $3.0 \times 10^{-8}$        |            |        |                                                                                                                                                                                                                                                                                                                                                                                                                                                                                                                                                                                                                                                                                                                                                                                                                                                                                                                                                                                                                                                                                                                                                                                                                                                                                                                                                                                                                                                                                                                                                                                                                                                                                                                                                                                                                                                                                                                                   |                                 |                         |       |                      |       |                      |       |                      |      |                      |      |                      |      |                      |     |                      |     |                      |     |                      |   |                      |   |                      |   |                      |    |                      |    |                      |    |                      |     |                      |
| 0.1                             | $2.5 \times 10^{-8}$        |            |        |                                                                                                                                                                                                                                                                                                                                                                                                                                                                                                                                                                                                                                                                                                                                                                                                                                                                                                                                                                                                                                                                                                                                                                                                                                                                                                                                                                                                                                                                                                                                                                                                                                                                                                                                                                                                                                                                                                                                   |                                 |                         |       |                      |       |                      |       |                      |      |                      |      |                      |      |                      |     |                      |     |                      |     |                      |   |                      |   |                      |   |                      |    |                      |    |                      |    |                      |     |                      |
| 0.2                             | $1.8 \times 10^{-8}$        |            |        |                                                                                                                                                                                                                                                                                                                                                                                                                                                                                                                                                                                                                                                                                                                                                                                                                                                                                                                                                                                                                                                                                                                                                                                                                                                                                                                                                                                                                                                                                                                                                                                                                                                                                                                                                                                                                                                                                                                                   |                                 |                         |       |                      |       |                      |       |                      |      |                      |      |                      |      |                      |     |                      |     |                      |     |                      |   |                      |   |                      |   |                      |    |                      |    |                      |    |                      |     |                      |
| 0.5                             | $1.2 \times 10^{-8}$        |            |        |                                                                                                                                                                                                                                                                                                                                                                                                                                                                                                                                                                                                                                                                                                                                                                                                                                                                                                                                                                                                                                                                                                                                                                                                                                                                                                                                                                                                                                                                                                                                                                                                                                                                                                                                                                                                                                                                                                                                   |                                 |                         |       |                      |       |                      |       |                      |      |                      |      |                      |      |                      |     |                      |     |                      |     |                      |   |                      |   |                      |   |                      |    |                      |    |                      |    |                      |     |                      |
| 1                               | $1.0 \times 10^{-8}$        |            |        |                                                                                                                                                                                                                                                                                                                                                                                                                                                                                                                                                                                                                                                                                                                                                                                                                                                                                                                                                                                                                                                                                                                                                                                                                                                                                                                                                                                                                                                                                                                                                                                                                                                                                                                                                                                                                                                                                                                                   |                                 |                         |       |                      |       |                      |       |                      |      |                      |      |                      |      |                      |     |                      |     |                      |     |                      |   |                      |   |                      |   |                      |    |                      |    |                      |    |                      |     |                      |
| 2                               | $0.8 \times 10^{-8}$        |            |        |                                                                                                                                                                                                                                                                                                                                                                                                                                                                                                                                                                                                                                                                                                                                                                                                                                                                                                                                                                                                                                                                                                                                                                                                                                                                                                                                                                                                                                                                                                                                                                                                                                                                                                                                                                                                                                                                                                                                   |                                 |                         |       |                      |       |                      |       |                      |      |                      |      |                      |      |                      |     |                      |     |                      |     |                      |   |                      |   |                      |   |                      |    |                      |    |                      |    |                      |     |                      |
| 5                               | $0.7 \times 10^{-8}$        |            |        |                                                                                                                                                                                                                                                                                                                                                                                                                                                                                                                                                                                                                                                                                                                                                                                                                                                                                                                                                                                                                                                                                                                                                                                                                                                                                                                                                                                                                                                                                                                                                                                                                                                                                                                                                                                                                                                                                                                                   |                                 |                         |       |                      |       |                      |       |                      |      |                      |      |                      |      |                      |     |                      |     |                      |     |                      |   |                      |   |                      |   |                      |    |                      |    |                      |    |                      |     |                      |
| 10                              | $0.6 \times 10^{-8}$        |            |        |                                                                                                                                                                                                                                                                                                                                                                                                                                                                                                                                                                                                                                                                                                                                                                                                                                                                                                                                                                                                                                                                                                                                                                                                                                                                                                                                                                                                                                                                                                                                                                                                                                                                                                                                                                                                                                                                                                                                   |                                 |                         |       |                      |       |                      |       |                      |      |                      |      |                      |      |                      |     |                      |     |                      |     |                      |   |                      |   |                      |   |                      |    |                      |    |                      |    |                      |     |                      |
| 20                              | $0.5 \times 10^{-8}$        |            |        |                                                                                                                                                                                                                                                                                                                                                                                                                                                                                                                                                                                                                                                                                                                                                                                                                                                                                                                                                                                                                                                                                                                                                                                                                                                                                                                                                                                                                                                                                                                                                                                                                                                                                                                                                                                                                                                                                                                                   |                                 |                         |       |                      |       |                      |       |                      |      |                      |      |                      |      |                      |     |                      |     |                      |     |                      |   |                      |   |                      |   |                      |    |                      |    |                      |    |                      |     |                      |
| 50                              | $0.5 \times 10^{-8}$        |            |        |                                                                                                                                                                                                                                                                                                                                                                                                                                                                                                                                                                                                                                                                                                                                                                                                                                                                                                                                                                                                                                                                                                                                                                                                                                                                                                                                                                                                                                                                                                                                                                                                                                                                                                                                                                                                                                                                                                                                   |                                 |                         |       |                      |       |                      |       |                      |      |                      |      |                      |      |                      |     |                      |     |                      |     |                      |   |                      |   |                      |   |                      |    |                      |    |                      |    |                      |     |                      |
| 100                             | $0.5 \times 10^{-8}$        |            |        |                                                                                                                                                                                                                                                                                                                                                                                                                                                                                                                                                                                                                                                                                                                                                                                                                                                                                                                                                                                                                                                                                                                                                                                                                                                                                                                                                                                                                                                                                                                                                                                                                                                                                                                                                                                                                                                                                                                                   |                                 |                         |       |                      |       |                      |       |                      |      |                      |      |                      |      |                      |     |                      |     |                      |     |                      |   |                      |   |                      |   |                      |    |                      |    |                      |    |                      |     |                      |



LATS1\_HID\_2

0.05546

-1.7780

0.7738

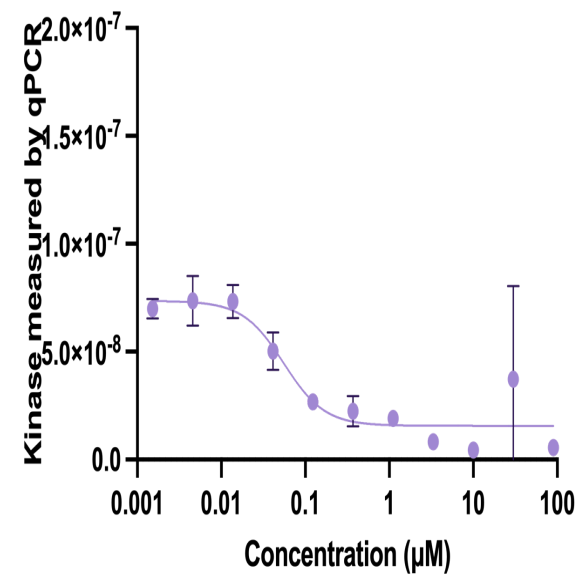

LATS1\_HID\_3

0.07242

-0.5208

0.9387

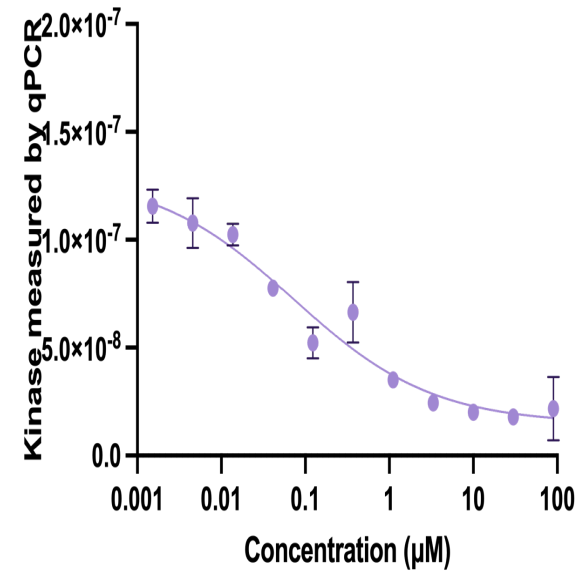

LATS1\_HID\_4

0.12520

-1.0700

0.9071

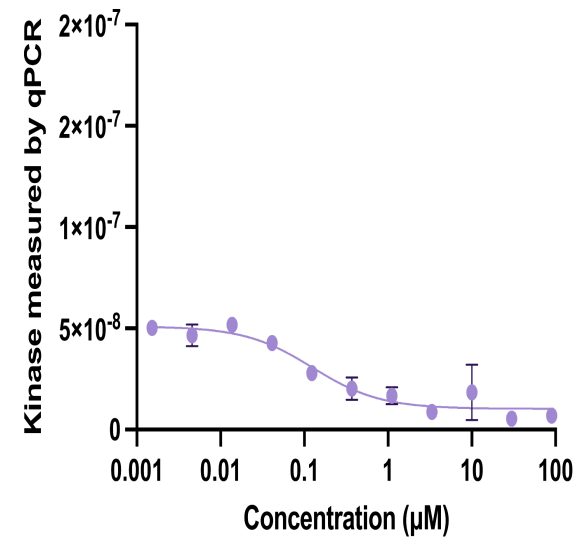

LATS1\_HID\_5

0.31550

-0.6241

0.8222

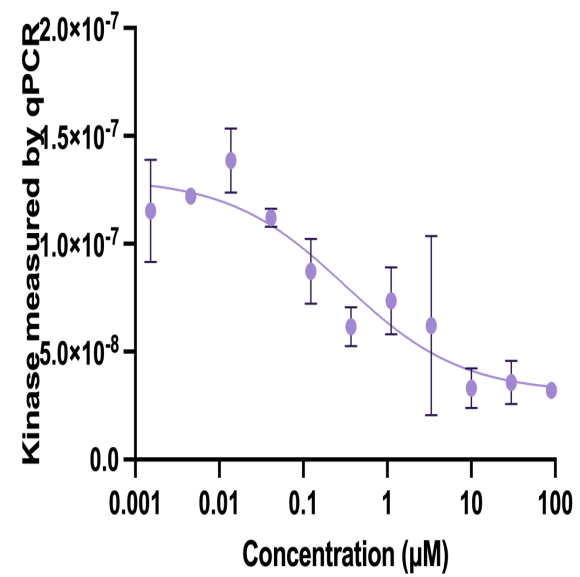

LATS1\_HID\_6

0.26590

-0.7033

0.9387

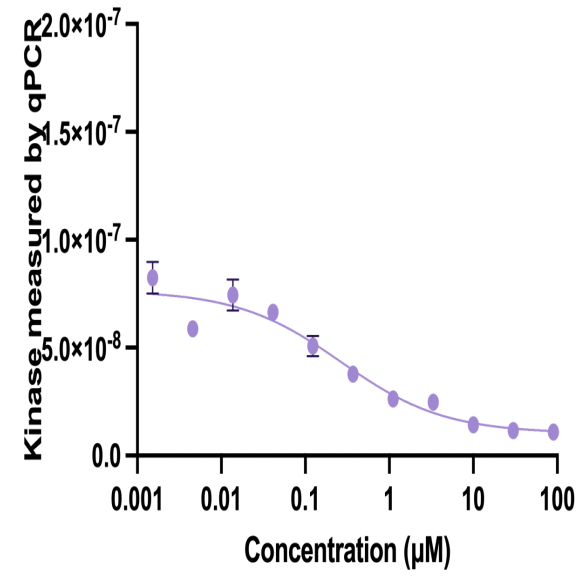

LATS1\_HID\_7

0.22750

-0.9714

0.8887

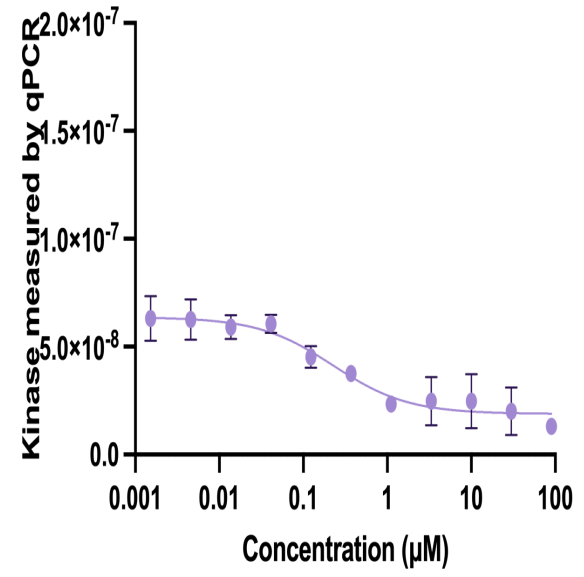

LATS1\_HID\_8

0.41860

-1.1130

0.9471

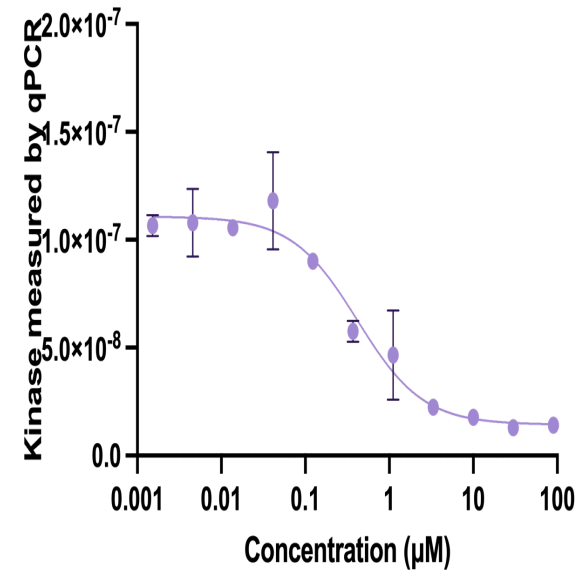

LATS1\_HID\_9

0.34360

-0.9266

0.9214

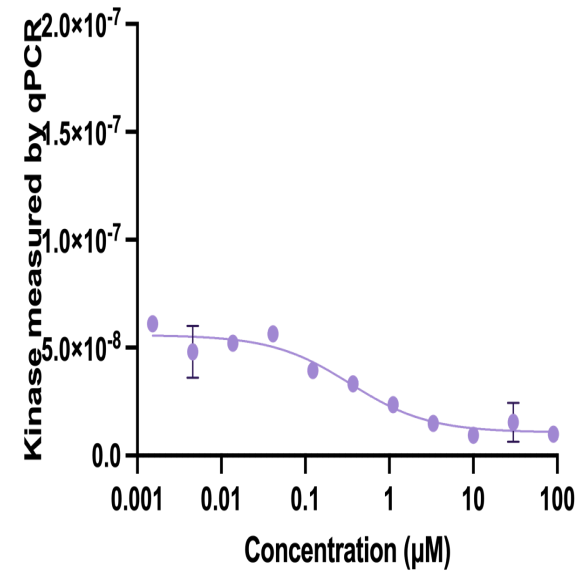



LATS1\_HID\_10

0.31120

-1.8580

0.8428

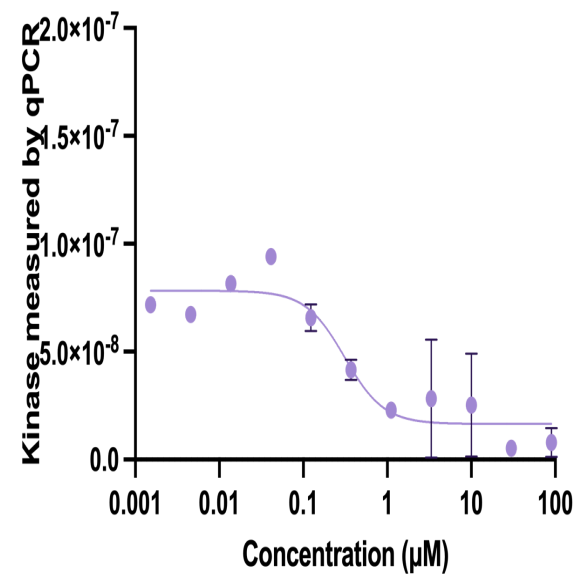

LATS1\_HVE\_1

0.03417

-2.2440

0.9913

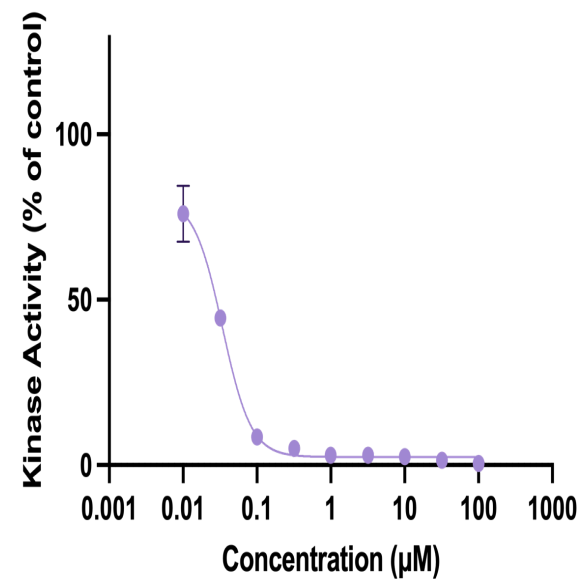

LATS1\_HVE\_2

0.02283

-0.6026

0.9925

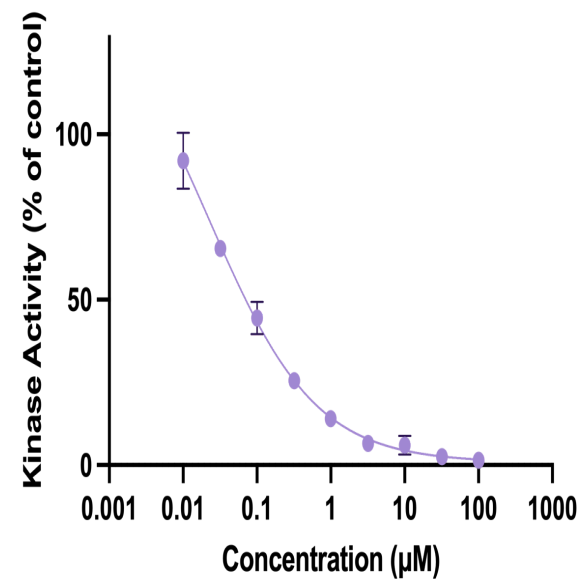

LATS1\_HVE\_3

0.07637

-1.0110

0.9969

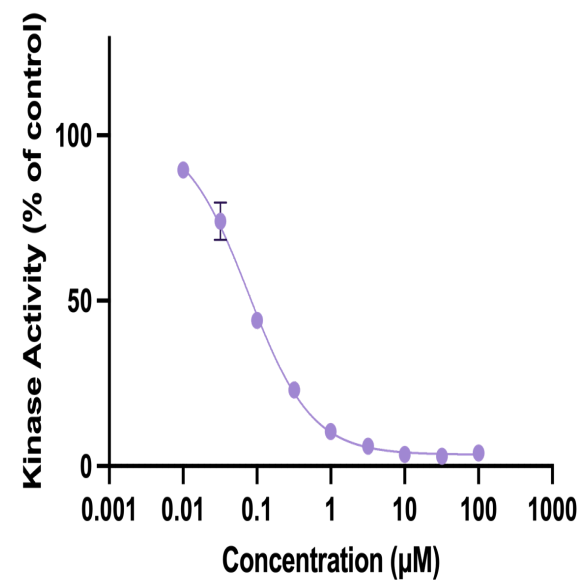

LATS1\_HVE\_4

0.10070

-1.4560

0.9551

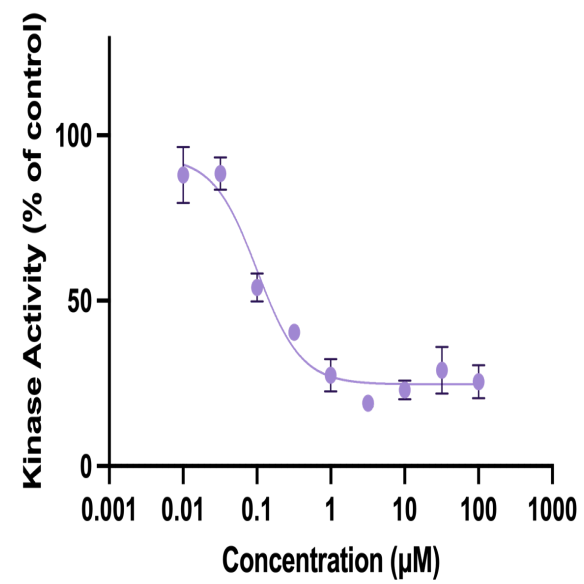

LATS1\_HVE\_5

0.10960

-1.2570

0.9887

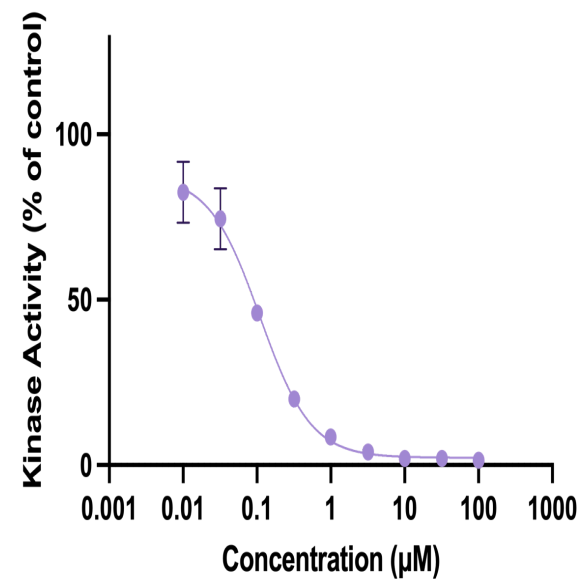

LATS1\_HVE\_6

0.01963

-0.5483

0.9822

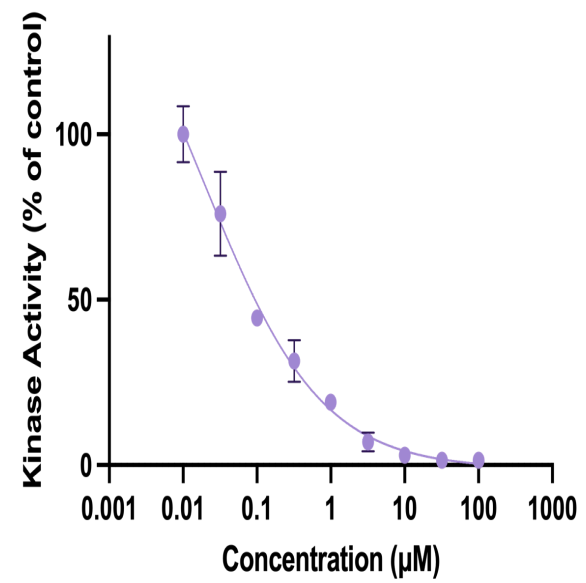

LATS1\_HVE\_7

0.11830

-0.6160

0.9848

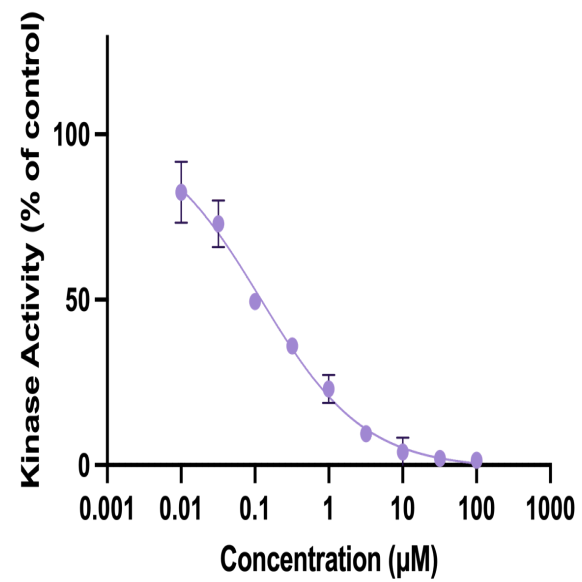



LATS1\_HVE\_8

0.14250

-1.1920

0.9913

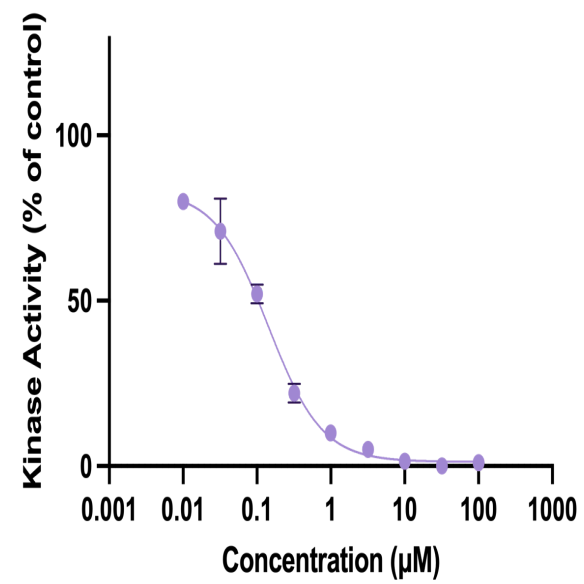

LATS1\_HVE\_9

0.15350

-0.9336

0.9971

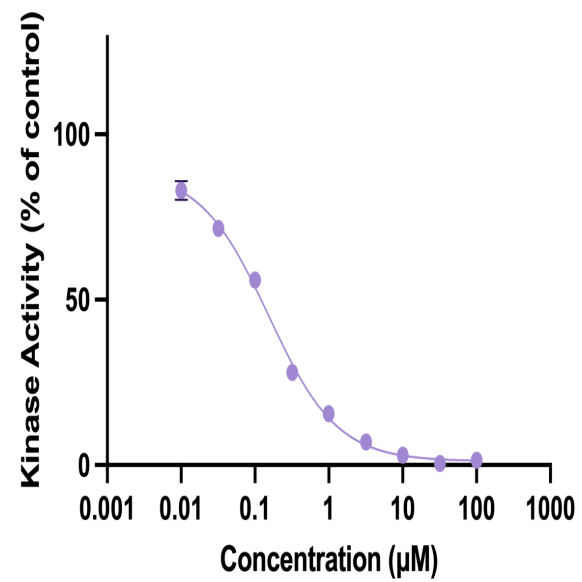

LATS1\_HVE\_10

0.19890

-1.0870

0.9814

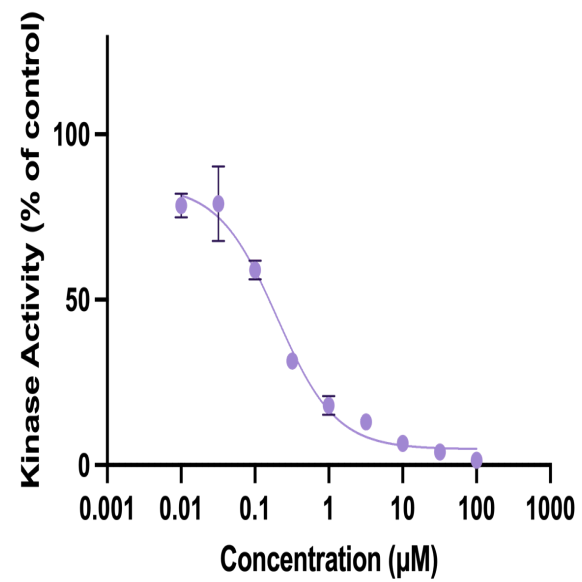

VCP\_HID\_1

4.31500

1.2110

0.9957

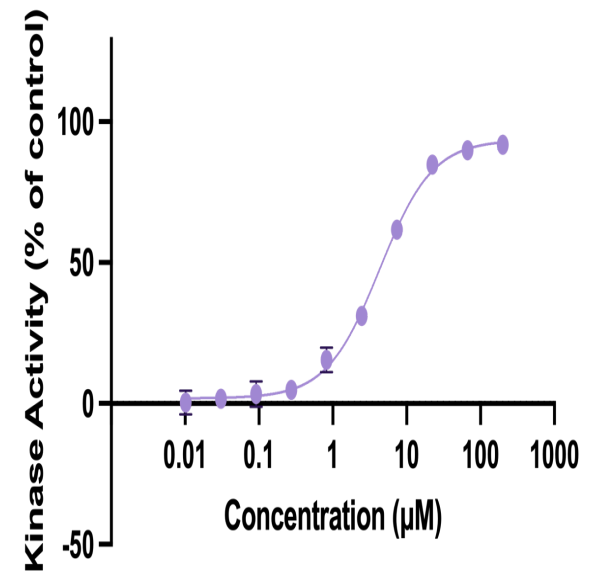

VCP\_HID\_2

20.81000

1.1450

0.9927

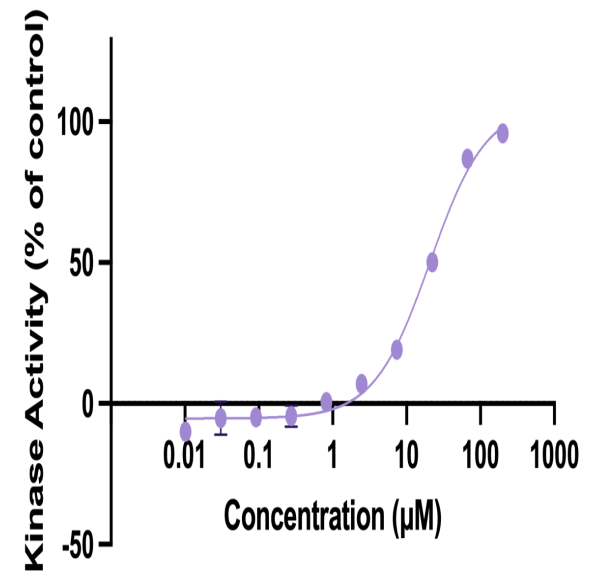

VCP\_HID\_3

42.31000

1.6770

0.9923

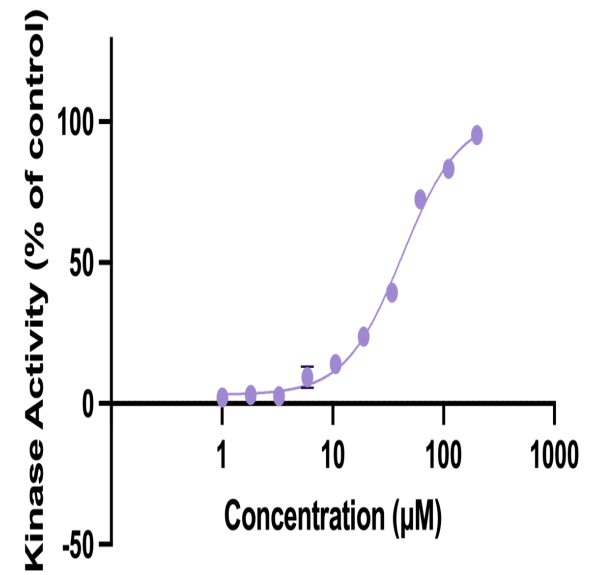

VCP\_HID\_4

14.08000

1.3260

0.9840

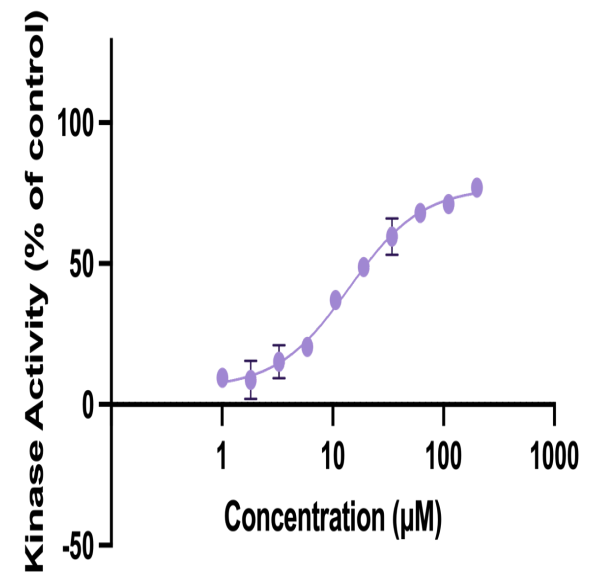

VCP\_HID\_5

7.46800

2.0280

0.9967

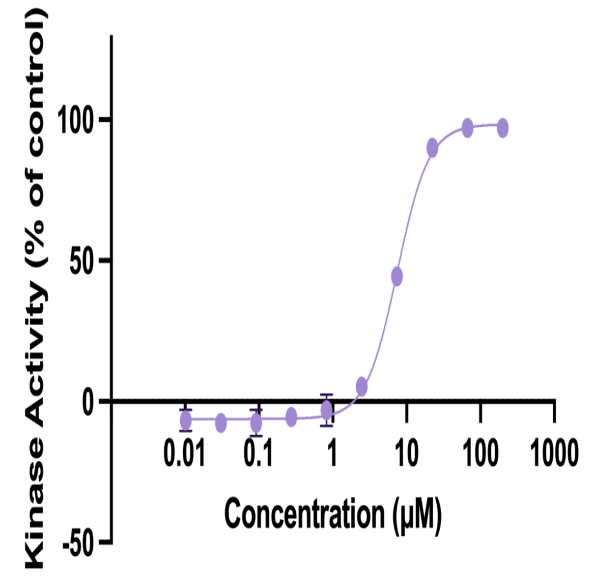



VCP\_HID\_6

12.58000

1.1450

0.9966

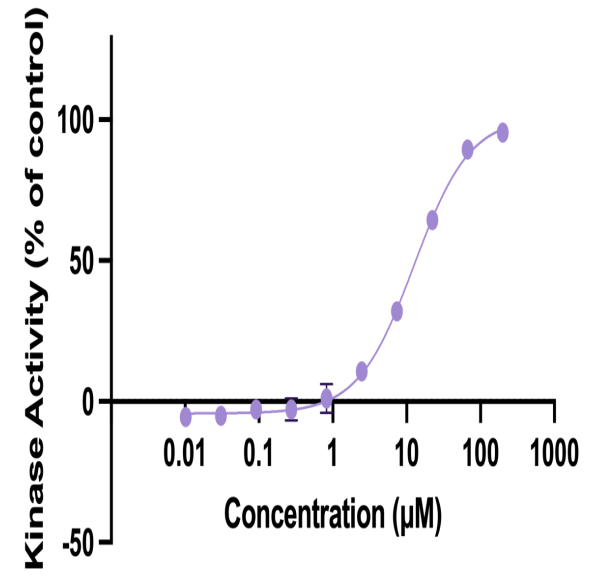

VCP\_HID\_7

22.92000

1.9530

0.9905

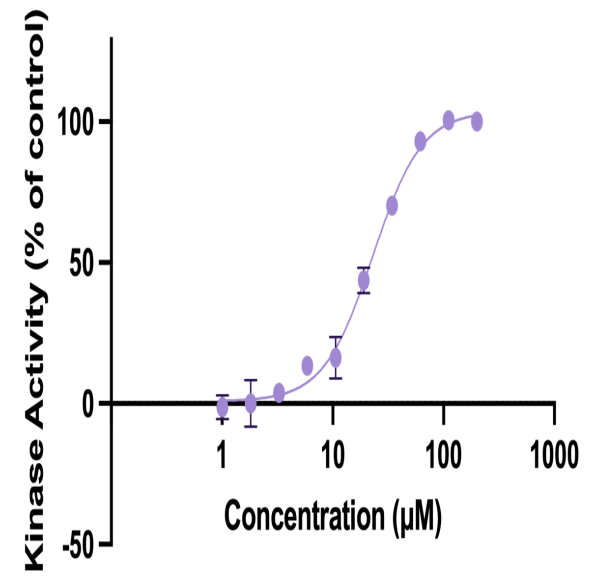

LATS1\_HVE\_PARENT\_1

0.14250

-1.1920

0.9913

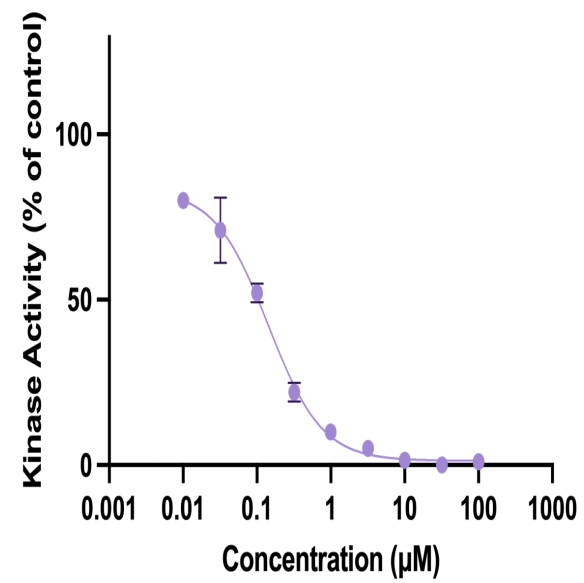

LATS1\_HVE\_PARENT\_2

0.01963

-0.5483

0.9822



LATS1\_HVE\_PARENT\_3

4.81600

-0.7635

0.9851

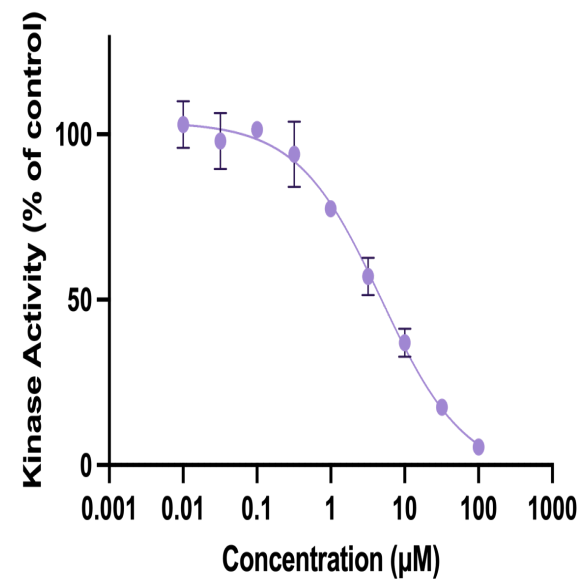

LATS1\_HVE\_PARENT\_4

0.94910

-1.0730

0.9777

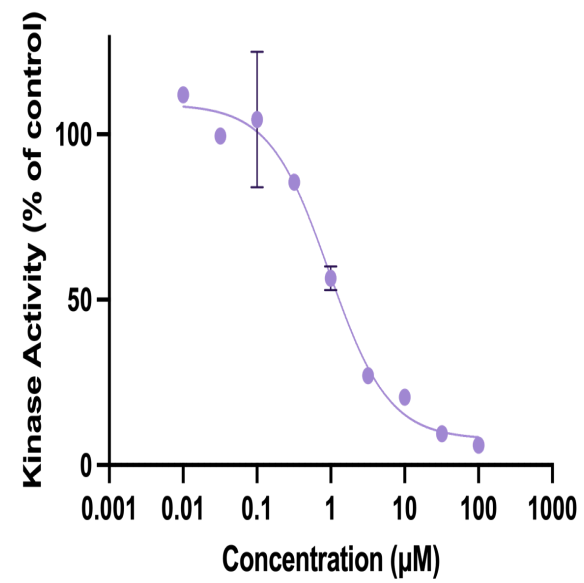

LATS1\_HVE\_PARENT\_5

2.20600

-0.9670

0.9625

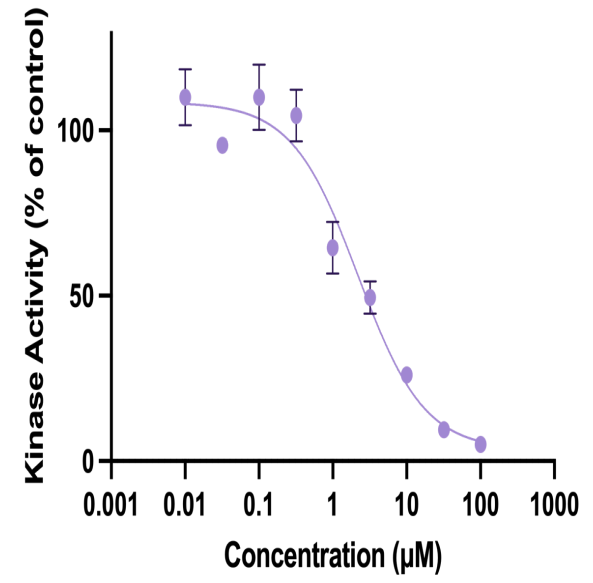

LATS1\_HVE\_PARENT\_6

3.80900

-1.1620

0.9700

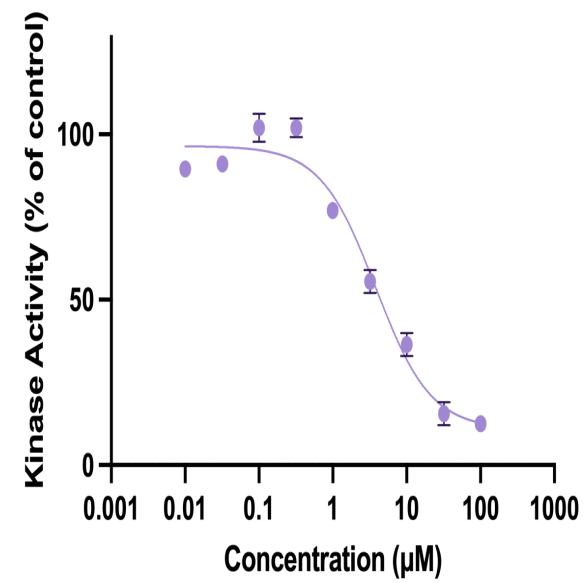



LATS1\_HVE\_PARENT\_7

2.94700

-0.9894

0.9876

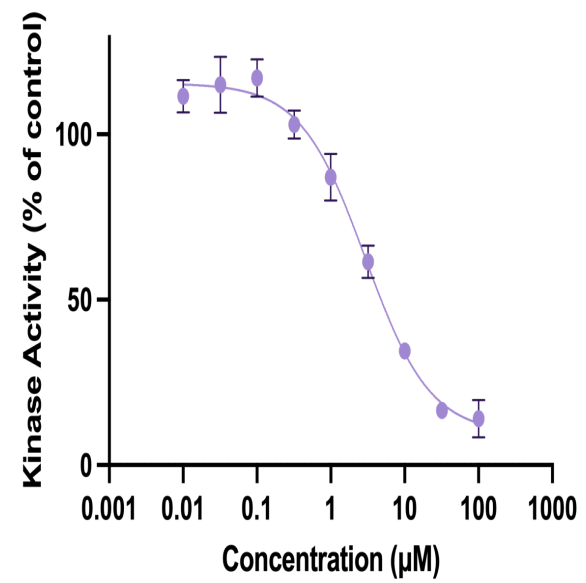

LATS1\_HVE\_PARENT\_8

4.26100

-1.1340

0.9559

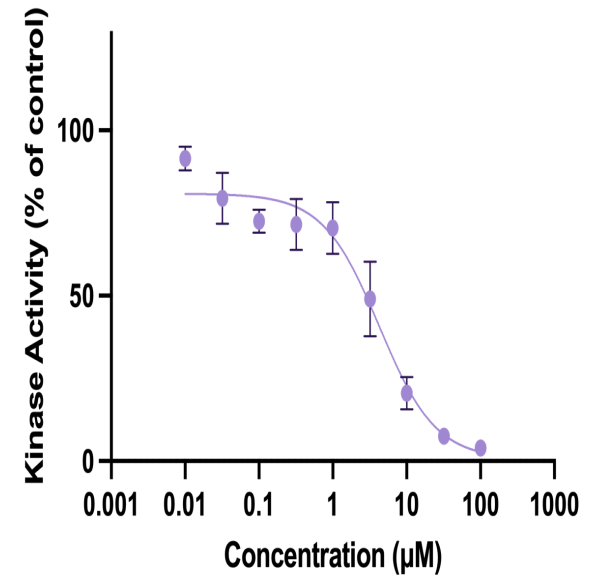

LATS1\_HVE\_BEST\_1

0.10070

-1.4560

0.9551

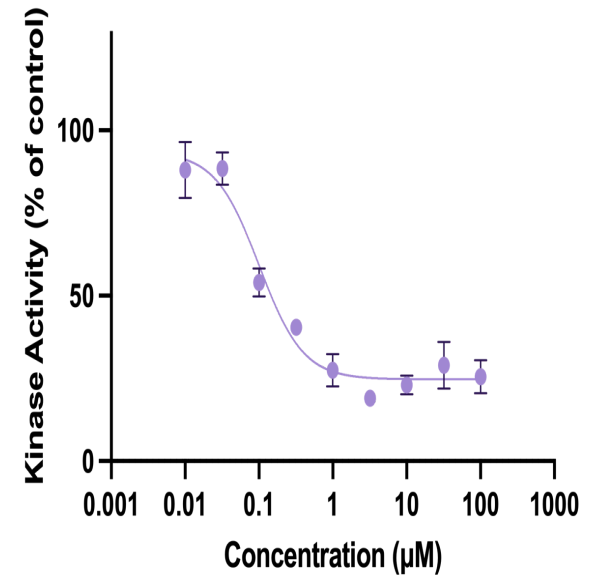

LATS1\_HVE\_BEST\_2

0.07637

-1.0110

0.9969

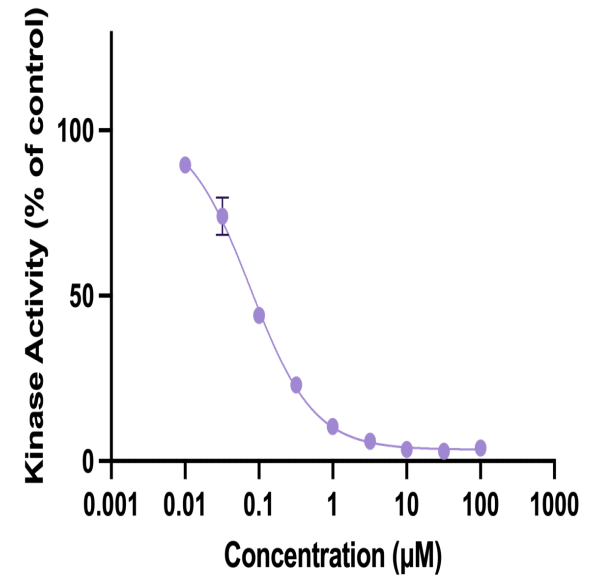

LATS1\_HVE\_BEST\_3

0.02283

-0.6026

0.9925

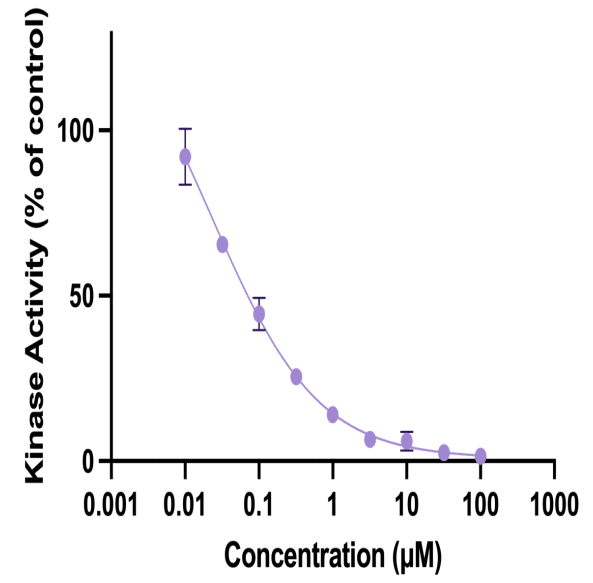

LATS1\_HVE\_BEST\_4

0.92020

-0.3087

0.9599

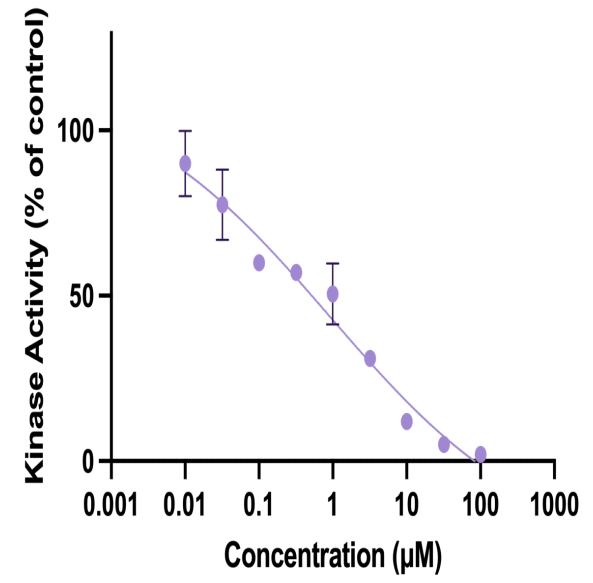

LATS1\_HVE\_BEST\_5

0.03417

-2.2440

0.9913

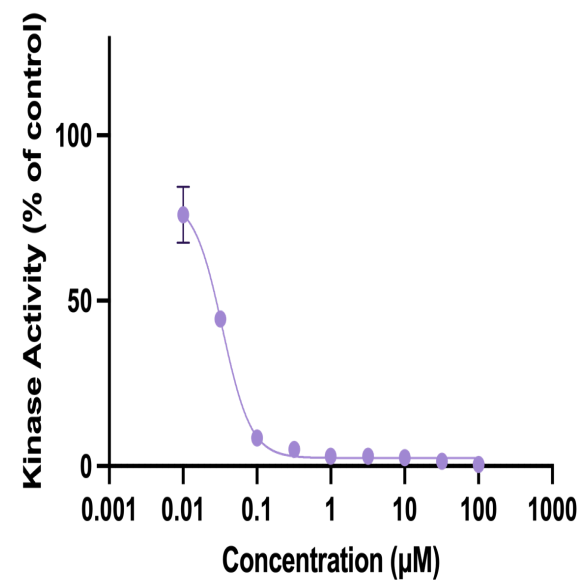

LATS1\_HVE\_BEST\_6

0.39100

-0.4623

0.9711

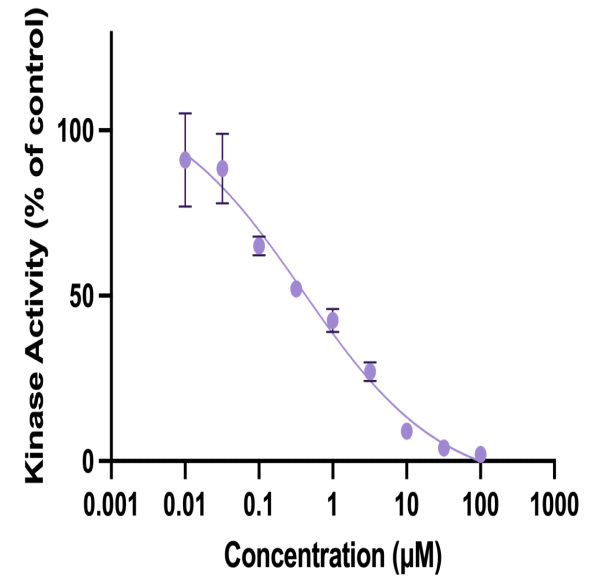



LATS1\_HVE\_BEST\_7

0.92570

-0.8672

0.9503

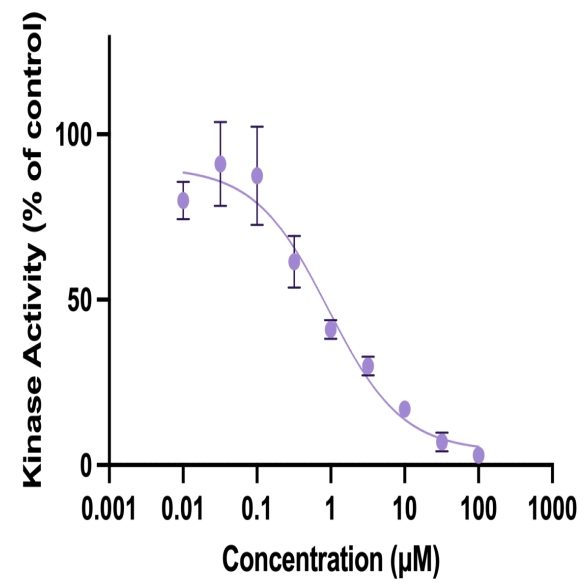

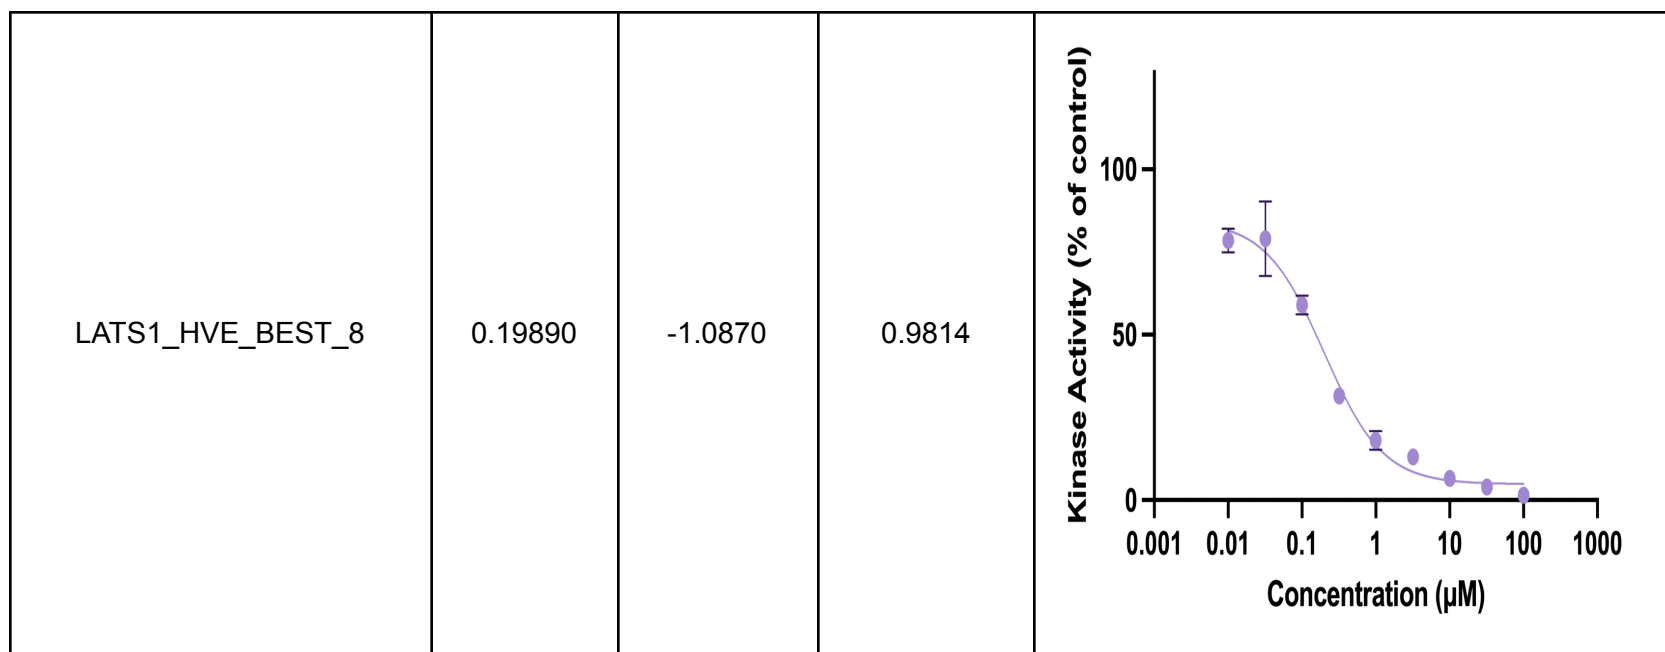

**Supplementary Table 9.** Dose-response curves of the bioactive compounds reported for LATS1 and VCP in the Internal Portfolio Validation section. Curve plots, hill slopes,  $R^2$ , and IC50 or Kd values were generated using Prism<sup>2</sup>.

<sup>2</sup> GraphPad Software, San Diego, California USA, [www.graphpad.com](http://www.graphpad.com)

| Compound ID | 10 most potent analogs                                                            | Analog potency (IC50, nM) | Nearest Neighbor (NN)                                                                | NN Similarity (ECFP4, Tanimoto) | NN potency (Kd/IC50,nM) |
|-------------|-----------------------------------------------------------------------------------|---------------------------|--------------------------------------------------------------------------------------|---------------------------------|-------------------------|
| LATS1_HVE_1 | 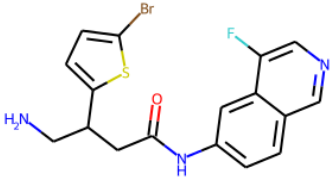 | 34                        |   | 0.23                            | 20.0                    |
| LATS1_HVE_2 |  | 75                        |  | 0.28                            | 10000.0                 |

|             |                                                                                   |     |                                                                                     |      |         |
|-------------|-----------------------------------------------------------------------------------|-----|-------------------------------------------------------------------------------------|------|---------|
| LATS1_HVE_3 | 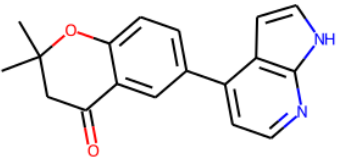 | 79  |  | 0.33 | 4.0     |
| LATS1_HVE_4 |  | 101 |  | 0.23 | 10000.0 |

|             |                                                                                   |     |                                                                                     |      |         |
|-------------|-----------------------------------------------------------------------------------|-----|-------------------------------------------------------------------------------------|------|---------|
| LATS1_HVE_5 | 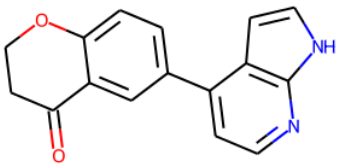 | 110 |  | 0.33 | 4.0     |
| LATS1_HVE_6 |  | 118 |  | 0.23 | 10000.0 |

|             |                                                                                   |     |                                                                                     |      |         |
|-------------|-----------------------------------------------------------------------------------|-----|-------------------------------------------------------------------------------------|------|---------|
| LATS1_HVE_7 | 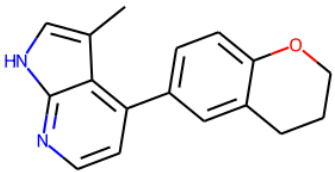 | 122 |  | 0.26 | NA      |
| LATS1_HVE_8 |  | 143 |  | 0.29 | 10000.0 |

|              |                                                                                   |     |                                                                                     |      |         |
|--------------|-----------------------------------------------------------------------------------|-----|-------------------------------------------------------------------------------------|------|---------|
| LATS1_HVE_9  | 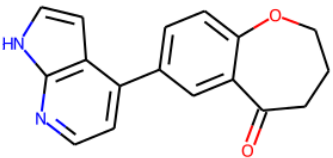 | 154 |  | 0.32 | 4.0     |
| LATS1_HVE_10 |  | 199 |  | 0.31 | 10000.0 |

**Supplementary Table 10.** Top 10 active compounds identified for LATS1 in the analog expansion. We selected 8 compounds for analog expansion for a total of 834 analogs. Of the 834 analogs tested in a KinaseProfiler functional assay, 435 showed more than 50% inhibition at 50 $\mu$ M, out of which 382 demonstrated DR behavior ranging from 0.034 $\mu$ M to 76 $\mu$ M. Most similar LATS1 compounds in the Atomwise database for each of the compounds are shown. The similarity between hits and database compounds (NN) is based on the Tanimoto similarity and ECFP4 fingerprints. NN Potencies are the median activities in the Atomwise database.

| Compound ID      | Most potent analog                                                                 | Analog potency (IC50, nM) | Parent ID          | Parent scaffold                                                                      | Parent potency (IC50,nM) |
|------------------|------------------------------------------------------------------------------------|---------------------------|--------------------|--------------------------------------------------------------------------------------|--------------------------|
| LATS1_HVE_BEST_1 | 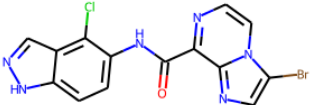  | 100.7                     | LATS1_HVE_PARENT_1 |   | 142.5                    |
| LATS1_HVE_BEST_2 |  | 78.6                      | LATS1_HVE_PARENT_2 |  | 117.5                    |



|                  |                                                                                     |       |                    |                                                                                       |        |
|------------------|-------------------------------------------------------------------------------------|-------|--------------------|---------------------------------------------------------------------------------------|--------|
| LATS1_HVE_BEST_3 | 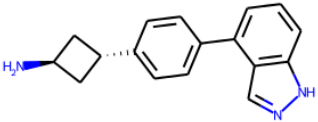   | 75.3  | LATS1_HVE_PARENT_3 |    | 4894   |
| LATS1_HVE_BEST_4 |    | 472.9 | LATS1_HVE_PARENT_4 |    | 1112.2 |
| LATS1_HVE_BEST_5 |  | 34.2  | LATS1_HVE_PARENT_5 |  | 2608   |

|                  |                                                                                     |       |                    |                                                                                       |        |
|------------------|-------------------------------------------------------------------------------------|-------|--------------------|---------------------------------------------------------------------------------------|--------|
| LATS1_HVE_BEST_6 | 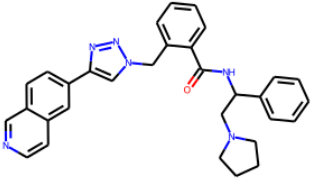   | 428.0 | LATS1_HVE_PARENT_6 |    | 3809.4 |
| LATS1_HVE_BEST_7 |    | 925.6 | LATS1_HVE_PARENT_7 |    | 3938.3 |
| LATS1_HVE_BEST_8 |  | 198.9 | LATS1_HVE_PARENT_8 |  | 4261.3 |

**Supplementary Table 11.** An illustration of the structural relations between the 8 LATS1 scaffolds selected for analog expansion and the most potent compound identified for the respective analog series.

| Compound ID | Identified hit                                                                      | MOA (competitive, uncompetitive, noncompetitive) | Hit potency (Kd, uM) | Nearest Neighbor (NN)                                                                 | NN Similarity (ECFP4, Tanimoto) | NN potency (Kd/IC50,uM) |
|-------------|-------------------------------------------------------------------------------------|--------------------------------------------------|----------------------|---------------------------------------------------------------------------------------|---------------------------------|-------------------------|
| VCP_HID_1   | 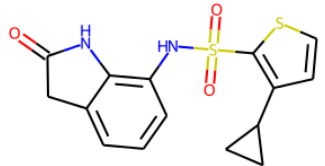   | Noncompetitive                                   | 11.3                 |    | 0.16                            | 0.23                    |
| VCP_HID_2   |  | Noncompetitive                                   | 11.7                 |  | 0.26                            | 1.40                    |

|           |                                                                                     |                |      |                                                                                       |      |      |
|-----------|-------------------------------------------------------------------------------------|----------------|------|---------------------------------------------------------------------------------------|------|------|
| VCP_HID_3 | 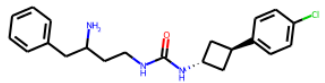   | Noncompetitive | 27.6 |    | 0.30 | 0.21 |
| VCP_HID_4 |    | Competitive    | 33.9 |    | 0.25 | 3.99 |
| VCP_HID_5 |  | Competitive    | 56.2 |  | 0.28 | 0.27 |

|           |                                                                                   |               |      |                                                                                     |      |      |
|-----------|-----------------------------------------------------------------------------------|---------------|------|-------------------------------------------------------------------------------------|------|------|
| VCP_HID_6 | 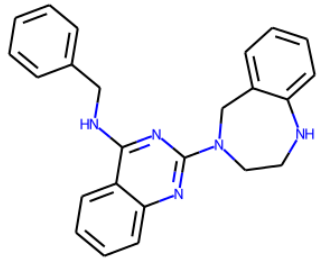 | Competitive   | 2.9  |  | 0.47 | 3.98 |
| VCP_HID_7 |  | Uncompetitive | 38.6 |  | 0.25 | NA   |

**Supplementary Table 12.** Top seven compounds discovered in the VCP R155H experimental screens of the virtual screening predictions. Initially, 416 predictions representing a diverse set of novel chemicals were screened at 50  $\mu\text{M}$  in the VCP R155H ADP-Glo bioluminescence assay, 20 of which were then advanced to dose-response studies with 19 showing dose-dependent inhibition ( $\text{IC}_{50}\text{s} = 2.4 - 99.7 \mu\text{M}$ ). Of the 19 compounds, seven compounds of interest were selected based on their potency and mechanism of action to be progressed to hit validation and expansion studies. Interestingly, one competitive compound (second from the last row of the table) is much closer to the boundary of our 0.5 Tanimoto distance cut-off than the other molecules, and the compound is more visually similar to its nearest neighbor than the other identified hits are to theirs.

# Acknowledgments

| <b>Authors</b>           | <b>Funding Acknowledgements</b>                                                                                                                                                        |
|--------------------------|----------------------------------------------------------------------------------------------------------------------------------------------------------------------------------------|
| Adolfo A Ferrando        | NIH [grants CA210065 and CA206501]                                                                                                                                                     |
| Adriano D. Andricopulo   | The São Paulo Research Foundation (FAPESP), Brazil [CEPID-CIBFar grant 13/07600-3] and the National Council for Scientific and Technological Development, Brazil [grant 309844/2017-7] |
| Agnidipta Ghosh          | NIH [grant S10 OD020068]                                                                                                                                                               |
| Alan Kie Leong Toh       | QUT Centre for Genomics and Personalised Health Innovation grant                                                                                                                       |
| Alan V. Smrcka           | NIH [grant R35GM127303]                                                                                                                                                                |
| Aleksandr Sverzhinsky    | Canadian Institutes of Health Research Grants MOP142354 and PJT173370 to J.M.P.                                                                                                        |
| Alessandra Mara de Sousa | PhD scholarship from Coordenação de Aperfeiçoamento de Pessoal de Nível Superior - Brasil (CAPES) [88887.604141/2021-00]                                                               |
| Alexander I. Agoulnik    | NIDDK/NIH [grant 1R01DK110167]                                                                                                                                                         |
| Alexander N Freiberg     | Institute for Human Infections & Immunity and Sealy & Smith Foundation                                                                                                                 |
| Alexander V. Statsyuk    | NIH [ grant R01GM115632]                                                                                                                                                               |
| Alexei Degterev          | NIAID [grants R01AI144400 and R21AI164003]                                                                                                                                             |

|                        |                                                                                                                                              |
|------------------------|----------------------------------------------------------------------------------------------------------------------------------------------|
| Alice Vrieling         | National Health and Medical Research Council of Australia [grant APP1078642]                                                                 |
| Andrea Caporali        | BHF-PG/16/58/32275 and RE/18/5/34216                                                                                                         |
| Andrea Chini           | PID2019-107012RB-100 (MICINN/FEDER) and AEI/10.13039/501100011033, "Severo Ochoa" Programme for Centres of Excellence in R&D (SEV-2017-0712) |
| Andrea Ilari           | RAREST-JHD project [RF-2016-02364123]                                                                                                        |
| Andrea Mattevi         | Associazione Italiana per la Ricerca sul Cancro [AIRC; IG19808]                                                                              |
| Andrea Trabocchi       | Fondazione Cassa di Risparmio di Pistoia e Pescia (Bando Giovani@Ricerca scientifica 2018)                                                   |
| Andreas Stahl          | NIH [grants R01 CA221916, UH3 DK120004, and R01 DK118940]                                                                                    |
| Andrew B. Herr         | Cincinnati Children's Hospital and Innovation Fund Award                                                                                     |
| Andrew Freywald        | Canadian Institutes of Health Research [Project Grant PJT-156401]                                                                            |
| Andrew White           | University of Michigan Center for the Discovery of New Medicines [UM-CDNM]                                                                   |
| Anil K Ojha            | NIH [grants AI132422, R21AI163599 and AI144474]                                                                                              |
| Anna A. L. Motyl       | LifeArc/CSO [grant CSO-003]                                                                                                                  |
| Antonio Del Rio Flores | NIH [grant R01GM136758]                                                                                                                      |
| Antonio E. Garmendia   | USDA/NIFA                                                                                                                                    |
| Antonito T. Panganiban | CDMrC [grant PR182311]                                                                                                                       |

|                              |                                                                                                                                                                          |
|------------------------------|--------------------------------------------------------------------------------------------------------------------------------------------------------------------------|
| Ariela Samantha              | National Health and Medical Research Council of Australia [grant APP1078642]                                                                                             |
| Ashley L. St. John           | Singapore Ministry of Education [grants MOE-T2EP30120-0011 and MOE2019-T2-1-146]                                                                                         |
| Bakary N'tji Diallo          | Wellcome Trust [grant 107740/Z/15/Z/DELGEME]                                                                                                                             |
| Brian V. Geisbrecht          | NIH [grant R35GM140852]                                                                                                                                                  |
| Bruce D Hammock              | NIEHS [grant R35 ES030443] and NIEHS Superfund Program [P42 ES004699]                                                                                                    |
| Bruno Eduardo Fernandes Mota | The author would like to thank UFMG, its intramural funds, and DRI for their support.                                                                                    |
| Camille Lempicki             | Camille Lempicki was supported by grants from the Deutsche Forschungsgemeinschaft (DFG) to Tobias Hermle: HE 7456/3-1, HE 7456/4-1, and project-ID 431984000 – SFB 1453. |
| Carrie L. Partch             | NIH [grant GM141849]                                                                                                                                                     |
| Chao-Yie Yang                | NIH [grant R01HL141432]                                                                                                                                                  |
| Charlene M. Kahler           | National Health and Medical Research Council of Australia [grant APP1078642]                                                                                             |
| Charles Karan                | Department of Medicine, Columbia University Irving Medical Center                                                                                                        |
| Charles Keller               | Golf Fights Cancer                                                                                                                                                       |
| Cheryl Peltier               | CancerCare Manitoba Foundation (CCMF), Manitoba Medical Services Foundation (MMSF), and University of Manitoba (UM)                                                      |
| Christian Weber              | DFG SFB1123                                                                                                                                                              |
| Clara Reglero                | The Leukemia & Lymphoma Society Special Fellowship                                                                                                                       |



|                          |                                                                                                                                                                                                            |
|--------------------------|------------------------------------------------------------------------------------------------------------------------------------------------------------------------------------------------------------|
| Daniel A. Keedy          | NIH [grant R35GM133769]                                                                                                                                                                                    |
| David A. Hildeman        | Cincinnati Children's Hospital and Innovation Fund Award                                                                                                                                                   |
| David H Drewry           | The Chordoma Foundation and The Mark Foundation for Cancer Research                                                                                                                                        |
| David J Dowling          | U.S. National Institutes of Health (NIH)/ National Institutes of Allergy and Infectious Diseases (NIAID) awards, including Adjuvant Discovery (75N93019C00044) and NIH grant (1R21AI137932-01A1) to D.J.D. |
| David P. Siderovski      | NIH [grants R01 DA048153 and U18 DA052497]                                                                                                                                                                 |
| David Shum               | MSIT 2017M3A9G6068254                                                                                                                                                                                      |
| Davide Maria Ferraris    | Roche per la ricerca 2017                                                                                                                                                                                  |
| Deborah H Anderson       | Canadian Institutes of Health Research (Funds 137154 and 179769)                                                                                                                                           |
| Deirdre R Coombe         | Centre for Genomics and Personalised Health Innovation Grant                                                                                                                                               |
| Diana Ortiz              | NIH [grant R33AI127591]                                                                                                                                                                                    |
| Dipayan Chaudhuri        | NIH [grant R01HL165797]                                                                                                                                                                                    |
| Donald R. Ronning        | NIH [grant R01AI105084]                                                                                                                                                                                    |
| Donghan Lee              | James Graham Brown Cancer Center                                                                                                                                                                           |
| Douglas William Zochodne | Canadian Institutes of Health Research [grant FRN15686]                                                                                                                                                    |

|                       |                                                                                                                                                       |
|-----------------------|-------------------------------------------------------------------------------------------------------------------------------------------------------|
| Dylan M Glubb         | QIMR Berghofer Proof of Concept Award                                                                                                                 |
| Edward C. Hsiao       | Department of Medicine, University of California, San Francisco                                                                                       |
| Elena Lenci           | Fondazione Cassa di Risparmio di Pistoia e Pescia (Bando Giovani@Ricerca scientifica 2018)                                                            |
| Emily R Mason         | NIH [grant U54AG065181]                                                                                                                               |
| Enrico Petretto       | Target Translation Consortium (TTC) and Duke-NUS Medical School                                                                                       |
| Eric J. Rubin         | Bill and Melinda Gates Foundation INV-009173                                                                                                          |
| Erick Strauss         | NIH [grant R01AI136836]                                                                                                                               |
| Erik W. Thompson      | Centre for Genomics and Personalised Health                                                                                                           |
| Erkang Fan            | NIH [grant R01 AI152358]                                                                                                                              |
| Erna Geessien Kroon   | CNPq [grant 315750/2020-0] and FAPEMIG [grant PPM-00452-17].<br>The author would like to thank UFMG, its intramural funds, and DRI for their support. |
| Evipidis Gavathiotis  | NIH/NCI [grant CA238229]                                                                                                                              |
| Franco J. Vizeacoumar | Canadian Institute of Health Research [grants PJT-178137 and PJT-156309]                                                                              |
| Frank Luh             | TMU Research Center of Cancer Translational Medicine of the Higher Education Sprout Project and the Ministry of Education (MOE) in Taiwan             |
| Frederick S Buckner   | NIH [grant R01 AI152358]                                                                                                                              |
| G. Marcela Rodriguez  | New Jersey Health Foundation [Grant # PC 112-21]                                                                                                      |

|                            |                                                                                                                                                                                                                                                                                                                                                                                                                        |
|----------------------------|------------------------------------------------------------------------------------------------------------------------------------------------------------------------------------------------------------------------------------------------------------------------------------------------------------------------------------------------------------------------------------------------------------------------|
| Gaétan Mayer               | Montreal Heart Institute Foundation                                                                                                                                                                                                                                                                                                                                                                                    |
| Geoffrey L. Greene         | Ludwig Fund for Cancer Research                                                                                                                                                                                                                                                                                                                                                                                        |
| George A. Garcia           | University of Michigan Center for the Discovery of New Medicines [UM-CDNM]                                                                                                                                                                                                                                                                                                                                             |
| Gergely L. Lukacs          | Canadian Institute of Health Research [grants PJT-153095 and PJT-173342], Cystic Fibrosis Foundation [grant LUKACS20G0], and Cystic Fibrosis Canada [grant 609247]                                                                                                                                                                                                                                                     |
| Gian Carlo G. Parico       | Howard Hughes Medical Institute (HHMI) Gilliam Fellowship; UCSC Division of Graduate Studies                                                                                                                                                                                                                                                                                                                           |
| Giovanni Roti              | AIRC Start-up Investigator Grant [n. 17107 GR], Leukemia Research Foundation, and IFAB Foundation                                                                                                                                                                                                                                                                                                                      |
| Giuseppe Fiermonte         | Italian Association for Cancer Research [AIRC grant IG 2022 Id. 27121 to G.F.] and Italian Ministero dell'Istruzione, dell'Università e della Ricerca [grant no. 2017PAB8EM_002 to G.F.]                                                                                                                                                                                                                               |
| Gracjan Michlewski         | Dioscuri, a programme initiated by the Max Planck Society, jointly managed with the National Science Centre in Poland, and mutually funded by Polish Ministry of Science and Higher Education and German Federal Ministry of Education and Research [2019/02/H/NZ1/00002 to G.M.]; Polish National Agency for Academic Exchange within Polish Returns Programme; National Science Centre [2021/01/1/NZ1/00001 to G.M.] |
| Guilherme Eduardo de Souza | FAPESP 2013/07600-3 and 2018/07287-7                                                                                                                                                                                                                                                                                                                                                                                   |
| Gustav Akk                 | NIH NIGMS [grant R35GM140947]                                                                                                                                                                                                                                                                                                                                                                                          |

|                        |                                                                                                                                  |
|------------------------|----------------------------------------------------------------------------------------------------------------------------------|
| Guzmán Alvarez         | grant I+D grupos CSIC UdelaR (ID_35)                                                                                             |
| Gökhan Cildir          | The Hospital Research Foundation (THRF) Early Career Fellowship                                                                  |
| Hai Li                 | Department of Medicine, Columbia University Irving Medical Center                                                                |
| Hamed Jafar-Nejad      | NIH [grant R35GM130317]                                                                                                          |
| Hannah P. Moore        | NIH [grant R01AR062587]                                                                                                          |
| Haynes (Shek Hei) Yuan | CancerCare Manitoba Foundation (CCMF), Terry Fox Research Institute (TFRI) and Canadian Institutes of Health Research (CIHR)     |
| Heinrich Hoppe         | Rhodes University Sandisa Imbewu grant, Grand Challenges Africa programme (GCA/DD/rnd3/032)                                      |
| Helena Chaytow         | My Name's Doddie Foundation [Ref: MN5DF Ox/Ed Feb 2019]                                                                          |
| Holly Van Remmen       | Department of Veteran Affairs Merit grant I01 BX004453 and OMRF funds                                                            |
| Hongyang Xu            | Department of Veteran Affairs Merit grant I01 BX004453 and OMRF funds                                                            |
| Howard B. Lieberman    | Department of Medicine, Columbia University Irving Medical Center                                                                |
| Hua-Ying Fan           | NIH/NCI Cancer Center support grant [P30CA118100]                                                                                |
| Hui Feng               | Boston University Ignition Award, American Cancer Society [RSG-17-204-01-TBG], and National Cancer Institute [grant R01CA215059] |
| Hyeong Jun Kim         | National Research Foundation of Korea [grant 2019R1A2C1085154]                                                                   |

|                       |                                                                                                                                           |
|-----------------------|-------------------------------------------------------------------------------------------------------------------------------------------|
| Ingrid M Verhamme     | NIH NHLBI [grant R01 HL130018]                                                                                                            |
| Insin Cakir           | The American Diabetes Association [grant no. 7-21-JDF-032]                                                                                |
| J. Jefferson P. Perry | DoD [W81XWH-19-1-0327]                                                                                                                    |
| Jacob Ferreira        | 1 F31 HD105363                                                                                                                            |
| Jadel Müller Kratz    | DNDi is grateful to its donors, public and private, who have provided funding for all DNDi activities since its inception in 2003.        |
| James G. Granneman    | NIH [grant R01DK076629]                                                                                                                   |
| James Shorter         | NIH/NIGMS [grant R01GM099836]                                                                                                             |
| Jarrold J. Mousa      | University of Georgia                                                                                                                     |
| Jeffrey P. MacKeigan  | National Cancer Institute [grants CA252430, CA197398 and CA263133]                                                                        |
| Jia Zhou              | NIH [grant R01 DA038446]                                                                                                                  |
| Jiabei Lin            | AARF from Alzheimer's association, Warren Alpert Distinguished Scholar Award                                                              |
| Jiake Xu              | Pathfinder, the University of Western Australia; NHMRC, APP1163933                                                                        |
| Jianghai Wang         | TMU Research Center of Cancer Translational Medicine of the Higher Education Sprout Project and the Ministry of Education (MOE) in Taiwan |
| Jinshi Zhao           | AI139216                                                                                                                                  |
| Jiyoun Lee            | The National Research Foundation of Korea [NRF-2018R1D1A1B07042846]                                                                       |

|                          |                                                                                                                                                                                                                                                                                                                         |
|--------------------------|-------------------------------------------------------------------------------------------------------------------------------------------------------------------------------------------------------------------------------------------------------------------------------------------------------------------------|
| Joana Reis               | AIRC and European Union's Horizon 2020 research and innovation programme under the Marie Skłodowska-Curie grant program [agreement No 800924.]                                                                                                                                                                          |
| Jochen Buck              | 5 P50 HD100549                                                                                                                                                                                                                                                                                                          |
| Joerg Stetefeld          | Tier-1 Canada Research Chair, Canadian Institute of Health Research [CIHR-PJT 152935]                                                                                                                                                                                                                                   |
| John J. Tanner           | NIH [grant R01GM065546]                                                                                                                                                                                                                                                                                                 |
| John M. Pascal           | Canadian Institutes of Health Research [grant PJT173370]                                                                                                                                                                                                                                                                |
| Jose A. Costoya          | Ministerio de Ciencia e Innovación (PID2020-113501RB-I00); Consellería de Cultura, Educación e Ordenación Universitaria (GPC GI-1862, ED431B 2020/26); Xunta de Galicia (Centro de investigación de Galicia accreditation 2019-2022; ED431G 2019/02) and the European Union (European Regional Development Fund – ERDF) |
| Joseph J. Maciag         | Cincinnati Children's Hospital and Innovation Fund Award                                                                                                                                                                                                                                                                |
| Joshua Alexander Nasburg | T32GM099608                                                                                                                                                                                                                                                                                                             |
| Juan José Lasarte        | Paula and Rodger Riney Foundation                                                                                                                                                                                                                                                                                       |
| Julian Milosavljevic     | Julian Milosavljevic was supported by grants from the Deutsche Forschungsgemeinschaft (DFG) to Tobias Hermle HE 7456/3-1, HE 7456/4-1, and project-ID 431984000 – SFB 1453                                                                                                                                              |
| Julijus Bogomolovas      | Marie Skłodowska-Curie Individual Fellowships (Titin Signals, 656636)                                                                                                                                                                                                                                                   |
| Jung-Min Kee             | National Research Foundation of Korea (2019R1A2C1085154)                                                                                                                                                                                                                                                                |
| Jung-Min Kee             | 2019R1A2C1085154                                                                                                                                                                                                                                                                                                        |

|                           |                                                                                                                                                                                |
|---------------------------|--------------------------------------------------------------------------------------------------------------------------------------------------------------------------------|
| Jônatas Santos<br>Abrahão | CNPq [grant 302081/2018-6], FAPEMIG [grant 27103] and CAPES [grant 88882.348380/2010-1]. The author would like to thank UFMG, its intramural funds, and DRI for their support. |
| Kasper B. Hansen          | NIH-NINDS [grant NS116055 and NIH-NIHGMS [grant GM103546]                                                                                                                      |
| Kevin M. Hopkins          | Department of Medicine, Columbia University Irving Medical Center                                                                                                              |
| Khaled Machaca            | Biomedical Research Program at Weill Cornell Medical College in Qatar (BMRP), a program funded by Qatar Foundation                                                             |
| Kirk James<br>McManus     | CIHR [Project Grant 162374]                                                                                                                                                    |
| Kiterie M E Faller        | Wellcome Trust Institutional Translational Partnership Award [WT iTPA PIII-067] and LifeArc/CSO [grant CSO-003]                                                                |
| Kiyo Nagamori             | Golf Fights Cancer                                                                                                                                                             |
| Konstantin V.<br>Korotkov | NIH NCATS [grant UL1TR001998]                                                                                                                                                  |
| Kyung Hyeon Lee           | NIH [grant R01HL132287]                                                                                                                                                        |
| Lajos Pusztai             | The Susan G Komen Foundation [Leadership Grant SAC 160076]                                                                                                                     |
| Lari Lehtiö               | Sigrid Juselius Foundation                                                                                                                                                     |
| Larisa M Haupt            | Centre for Genomics and Personalised Health                                                                                                                                    |
| Leila Su                  | TMU Research Center of Cancer Translational Medicine of the Higher Education Sprout Project and the Ministry of Education (MOE) in Taiwan                                      |
| Ling Zhuo                 | Chinese Scholarship Council                                                                                                                                                    |
| Lizbeth Hedstrom          | NIH NIAID [grant AI125362 to G.D. Cuny, University of Houston]                                                                                                                 |

|                    |                                                                                                                                                                  |
|--------------------|------------------------------------------------------------------------------------------------------------------------------------------------------------------|
| Lizbeth Hedstrom   | NIH NIGMS [grant R01GM142041]                                                                                                                                    |
| Lonny Levin        | 5 P50 HD100549                                                                                                                                                   |
| Luke Whitesell     | Fellowship Grant from PRiME Initiative at University of Toronto                                                                                                  |
| Maira Harume Nagai | NIH/NIDCD [grant DC016224]                                                                                                                                       |
| Marc P. Lussier    | Natural Sciences and Engineering Research Council of Canada [Discovery Grant # RGPIN-2017-05392]                                                                 |
| Marc P. Windisch   | National Research Foundation of Korea (NRF) grant funded by the Korean government (MSIT) (NRF-2020R1A2C2009529, NRF-2019R1A2C1090515, and NRF-2017M3A9G6068246). |
| Marco Lolicato     | Fondazione Cariplo Grant# 2019-1809 -- "Programma per Giovani Ricercatori—Rita Levi Montalcini 2013" [project number: PGR16HTPSF]                                |
| Maria J. Macias    | Ministerio de Ciencia, Innovación y Universidades -- BFU2017-82675-P                                                                                             |
| Marilia Valli      | Fapesp #2019/05967-3                                                                                                                                             |
| Marim M Barghash   | Ontario Graduate Scholarship and Dorthy Sterling Dow Walsh Award                                                                                                 |
| Mario Mellado      | PID2020-114980RB-I00                                                                                                                                             |
| Mark A. Wilson     | NIH [grant R01GM139978]                                                                                                                                          |
| Mark Hannink       | University of Missouri Spinal Cord Injuries Research Program                                                                                                     |
| Martin K Safo      | NIH/NHLBI [grant R61HL156158] and NIH/NIMHD [grant R01MD009124]                                                                                                  |
| Martin St. Maurice | NIH [grant R15 GM131356]                                                                                                                                         |



|                             |                                                                                                                                                                                                                                                                                                                                                                                                                        |
|-----------------------------|------------------------------------------------------------------------------------------------------------------------------------------------------------------------------------------------------------------------------------------------------------------------------------------------------------------------------------------------------------------------------------------------------------------------|
| Mary Ann McDowell           | Department of Defense Telemedicine and Advanced Technology Research Center (TATRC) awards #W81XWH-10-1-0085 and W81XWH-11-1-0415                                                                                                                                                                                                                                                                                       |
| Masfique Mehedi             | NIH/NIGMS [grant P20GM113123]                                                                                                                                                                                                                                                                                                                                                                                          |
| Mateus Sá Magalhães Serafim | CAPES [grant number 88887.595578/2020-00] and the author would like to thank UFMG, its intramural funds, and DRI for their support.                                                                                                                                                                                                                                                                                    |
| Matthew B. Soellner         | NIH [grant 5R01GM125881]                                                                                                                                                                                                                                                                                                                                                                                               |
| Maxim Skorodinsky           | CancerCare Manitoba Foundation (CCMF), Manitoba Medical Services Foundation (MMSF), and University of Manitoba (UM)                                                                                                                                                                                                                                                                                                    |
| Michael Mowat               | CancerCare Manitoba Foundation and Cancer Research Society                                                                                                                                                                                                                                                                                                                                                             |
| Michael R Jackson           | NIH [grant 5R01AG058446]                                                                                                                                                                                                                                                                                                                                                                                               |
| Mikell Paige                | NIH [grant R01HL132287]                                                                                                                                                                                                                                                                                                                                                                                                |
| Natalia Stec                | Dioscuri, a programme initiated by the Max Planck Society, jointly managed with the National Science Centre in Poland, and mutually funded by Polish Ministry of Science and Higher Education and German Federal Ministry of Education and Research [2019/02/H/NZ1/00002 to G.M.]; Polish National Agency for Academic Exchange within Polish Returns Programme; National Science Centre [2021/01/1/NZ1/00001 to G.M.] |
| Neha S. Gandhi              | Center for Genomics and Personalised Health                                                                                                                                                                                                                                                                                                                                                                            |
| Nicola Longo                | Research grant from the Association for Creatine Deficiencies                                                                                                                                                                                                                                                                                                                                                          |
| Nirvan Rouzbeh              | NIH-NINDS [grant NS116055] and NIH-NIHGMS [grant GM103546]                                                                                                                                                                                                                                                                                                                                                             |

|                                  |                                                                                                                                                                                                           |
|----------------------------------|-----------------------------------------------------------------------------------------------------------------------------------------------------------------------------------------------------------|
| Njabulo Joyfull<br>Gumede        | SAMRC - Research Capacity Development Initiative for Historically Disadvantaged Institutions                                                                                                              |
| Noureddine Ben<br>Khalaf         | AGU Intramural Grant LS_NB_18                                                                                                                                                                             |
| Olli Silvennoinen                | Academy of Finland, Sigrid Jusélius Foundation, Finnish Cancer Foundation, Jane and Aatos Erkko Foundation, Tampere Tuberculosis Foundation, and Pirkanmaa hospital district competitive research funding |
| Paul V. Fish                     | Alzheimer's Research UK [520909]                                                                                                                                                                          |
| Paulo Otávio<br>Lourenço Moreira | PhD scholarship from Coordenação de Aperfeiçoamento de Pessoal de Nível Superior - Brasil (CAPES) [88887.473451/2020-00]                                                                                  |
| Pei Zhou                         | AI139216                                                                                                                                                                                                  |
| Pengda Liu                       | Gabrielle's Angel Foundation Medical Research Award                                                                                                                                                       |
| Percy<br>Agogo-Mawuli            | NIH [grants R01 DA048153 and U18 DA052497]                                                                                                                                                                |
| Peter L Jones                    | NIH/NIAMS [grant R01AR062587]                                                                                                                                                                             |
| Philbert Ip                      | Mitacs Accelerate fellowship (IT09755)                                                                                                                                                                    |
| Philipp von<br>Hundelshausen     | DFG SFB1123 A2                                                                                                                                                                                            |
| Pil H. Lee                       | University of Michigan Center for the Discovery of New Medicines [UM-CDNM]                                                                                                                                |
| Rafael<br>Balaña-Fouce           | SAF2017-83575-R                                                                                                                                                                                           |
| Rafael V. C. Guido               | FAPESP 2013/07600-3 and 2020/12904-5                                                                                                                                                                      |

|                          |                                                                                                                                                                                                                                                    |
|--------------------------|----------------------------------------------------------------------------------------------------------------------------------------------------------------------------------------------------------------------------------------------------|
| Rafaela Salgado Ferreira | CAPES, FAPEMIG [Rede Mineira de Imunobiologicos grant # REDE-00140-16], and CNPq Researcher Scholarship [Bolsa de Produtividade em Pesquisa, 310197/2021-0]. The author would like to thank UFMG, its intramural funds, and DRI for their support. |
| Rajendra K. Agrawal      | NIH [grant R01 GM061576]                                                                                                                                                                                                                           |
| Rajesh Ramachandran      | NIH [grant R01 GM121583]                                                                                                                                                                                                                           |
| Rajkumar Verma           | START PPOC by Office of Vice president for Research at UConn                                                                                                                                                                                       |
| Remus T. Dame            | Netherlands Organization for Scientific Research [VICI 016.160.613]; Leiden University-Gratama fund [2020-09/W20386-1-GSL]                                                                                                                         |
| Richard E. Taylor        | NIH [grant R01GM129465] and Grace Science Foundation                                                                                                                                                                                               |
| Richard H. Ebright       | NIH [grant GM041376]                                                                                                                                                                                                                               |
| Robert A. Batey          | NSERC                                                                                                                                                                                                                                              |
| Robert Blelloch          | Patel Family Grant Award                                                                                                                                                                                                                           |
| Robert J Vandenberg      | NIH [grant R01DA048879]                                                                                                                                                                                                                            |
| Robert J. Hickey         | DoD CDRMP BCRP W81XWH-19-1-0327                                                                                                                                                                                                                    |
| Robert J. Kelm, Jr.      | University of Vermont Cancer Center Pilot Project Award                                                                                                                                                                                            |
| Robert K. Bradley        | Washington Research Foundation (Commercialization Program Phase 2 Award)                                                                                                                                                                           |

|                              |                                                                                                                                                                                                                                              |
|------------------------------|----------------------------------------------------------------------------------------------------------------------------------------------------------------------------------------------------------------------------------------------|
| Roberto Solano               | PID2019-107012RB-100 (MICINN/FEDER) and AEI/10.13039/501100011033, "Severo Ochoa" Programme for Centres of Excellence in R&D (SEV-2017-0712)                                                                                                 |
| Ronan R<br>McCarthy          | BBSRC New Investigator Award BB/V007823/1 and Academy of Medical Sciences/the Wellcome Trust/ the Government Department of Business, Energy and Industrial Strategy/the British Heart Foundation/Diabetes UK Springboard Award [SBF006\1040] |
| Rosa Maria<br>Reguera        | SAF2017-83575-R                                                                                                                                                                                                                              |
| Ruben Vazquez<br>Uribe       | Novo Nordisk Foundation [grant NNF20CC0035580]                                                                                                                                                                                               |
| Rubens Lima do<br>Monte-Neto | Minas Gerais State Agency for Research and Development – Fapemig [grant PPM-00699-18] and CNPq - Brazilian National Council for Scientific and Technological Development - Research fellowship [grant 312965/2020-6]                         |
| Ryan T. Cullinane            | NIH NIGMS [grant R01GM142041]                                                                                                                                                                                                                |
| Sachin Katyal                | CancerCare Manitoba Foundation (CCMF), Terry Fox Research Institute (TFRI) and Canadian Institutes of Health Research (CIHR)                                                                                                                 |
| Samuel A<br>Shelburne        | NIH/NIAID [grant R01AI125292]                                                                                                                                                                                                                |
| Scott M Landfear             | NIH [grant R21 AI114842]                                                                                                                                                                                                                     |
| Seung-Yong Seo               | NRF-2022R1A2C1092715                                                                                                                                                                                                                         |
| Shaoyou Chu                  | NIH [grant U54AG065181]                                                                                                                                                                                                                      |
| Shefali Chauhan              | Golf Fights Cancer                                                                                                                                                                                                                           |

|                     |                                                                                                                                                                                                                                                                                                                                                                                                                        |
|---------------------|------------------------------------------------------------------------------------------------------------------------------------------------------------------------------------------------------------------------------------------------------------------------------------------------------------------------------------------------------------------------------------------------------------------------|
| Shireen R. Ashkar   | University of Michigan Center for the Discovery of New Medicines [UM-CDNM]                                                                                                                                                                                                                                                                                                                                             |
| Show-Ling Shyng     | NIH [grant R01DK066485]                                                                                                                                                                                                                                                                                                                                                                                                |
| Silvia Buroni       | Italian Ministry of Education, University and Research (MIUR) (Dipartimenti di Eccellenza, Program 2018–2022)                                                                                                                                                                                                                                                                                                          |
| Siran Zhu           | Dioscuri, a programme initiated by the Max Planck Society, jointly managed with the National Science Centre in Poland, and mutually funded by Polish Ministry of Science and Higher Education and German Federal Ministry of Education and Research [2019/02/H/NZ1/00002 to G.M.]; Polish National Agency for Academic Exchange within Polish Returns Programme; National Science Centre [2021/01/1/NZ1/00001 to G.M.] |
| Soonju Park         | National Research foundation of Korea (NRF) grant funded by the Korea government(MSIT)(NRF-2017M3A9G6068246)                                                                                                                                                                                                                                                                                                           |
| Sophia Q. Xu        | NIH NIGMS [grant R35GM140947]                                                                                                                                                                                                                                                                                                                                                                                          |
| Sourav Banerjee     | Cancer Research UK EDDPMA-May21\100005                                                                                                                                                                                                                                                                                                                                                                                 |
| Stefan Zahler       | Dr. Pflieger Stiftung                                                                                                                                                                                                                                                                                                                                                                                                  |
| Stephen J. Capuzzi  | The Eshelman Institute for Innovation                                                                                                                                                                                                                                                                                                                                                                                  |
| Stephen N. Waggoner | NIH [grants DA038017 and AI148080]                                                                                                                                                                                                                                                                                                                                                                                     |
| Steven H Olson      | NIH [grant R01 AG071694-01A1]                                                                                                                                                                                                                                                                                                                                                                                          |
| Steven R Van Doren  | Hirshberg Foundation for Pancreatic Cancer Research and University of Missouri Research Council                                                                                                                                                                                                                                                                                                                        |
| Suryakala Sarilla   | NIH NHLBI [grant R01 HL130018]                                                                                                                                                                                                                                                                                                                                                                                         |

|                          |                                                                                                       |
|--------------------------|-------------------------------------------------------------------------------------------------------|
| Tatjana Abaffy           | NIH/NIDCD [grant DC016224 to Hiroaki Matsunami]                                                       |
| Thilina D<br>Jayasinghe  | NIH [grant R01AI105084]                                                                               |
| Thomas H<br>Gillingwater | LifeArc/CSO [grant CSO-003]                                                                           |
| Thomas<br>Kampourakis    | British Heart Foundation [PG/19/52/34497]                                                             |
| Timothy I.<br>Richardson | NIH [grant U54AG065181]                                                                               |
| Timothy J.<br>Herdendorf | NIH [grant R35GM140852]                                                                               |
| Timothy W.<br>Corson     | NIH/NEI [grant R01EY025641]; BrightFocus Foundation                                                   |
| Tobias Hermle            | Deutsche Forschungsgemeinschaft (DFG) [HE 7456/3-1, HE 7456/4-1, and project-ID 431984000 – SFB 1453] |
| Tomisin Happy<br>Ogunwa  | Takeda Science Foundation, Japan under the International Fellowship Programs for Foreign Researchers  |
| Tong Su                  | University of Missouri Spinal Cord Injuries Research Program                                          |
| Tracy A O'Mara           | National Health and Medical Research Council of Australia Investigator Fellowship (APP1173170)        |
| Tsui-Fen Chou            | National Institute of Neurological Disorders and Stroke (NINDS) [grant R01NS102279]                   |
| Ulrich Baumann           | Deutsche Forschungsgemeinschaft (DFG, German Research Foundation)–Project-ID 73111208 - SFB 829       |
| Umesh R Desai            | NIH [grants HL107152 and HL128639]                                                                    |

|                               |                                                                                                                               |
|-------------------------------|-------------------------------------------------------------------------------------------------------------------------------|
| Van Chi Thai                  | National Health and Medical Research Council of Australia [grant APP1078642]                                                  |
| Versha Banerji                | CancerCare Manitoba Foundation, Manitoba Medical Services Foundation, and University of Manitoba                              |
| Victoria L. Robinson          | Program in Innovative Therapeutics for Connecticut's Health (PITCH); UConn Research Foundation                                |
| Vignesh Gunasekharan          | Lion Heart Pilot Grant                                                                                                        |
| Vincent FM Segers             | Fund for Scientific Research Flanders [ID: 1842219N and G021420N]                                                             |
| Vinícius Gonçalves Maltarollo | FAPEMIG [grant number APQ-01818-21] and the author would like to thank UFMG, its intramural funds, and DRI for their support. |
| W. Brent Clayton              | NIH [grant U54AG065181]                                                                                                       |
| W. Todd Lowther               | Oxalosis and Hyperoxaluria Foundation                                                                                         |
| Walid A. Houry                | Canadian Institutes of Health Research [operating grants PJT-173345 and PJT-173491]                                           |
| Wenjun Zhang                  | NIH [grant R01GM136758]                                                                                                       |
| Wesley C. Van Voorhis         | NIH/NIAID (contract HHSN272200700059C)                                                                                        |
| William A. Donaldson          | NIH [grant GM131356]                                                                                                          |
| William C. Hahn               | NIH [grant R03 TR003343]                                                                                                      |
| William G. Kerr               | NIH [R01 AG059717]                                                                                                            |
| Xin Qi                        | NIH [grants R01AG065240, R01NS115903, and R01AG076051]                                                                        |

|                       |                                                                                                                                                                                                                                                    |
|-----------------------|----------------------------------------------------------------------------------------------------------------------------------------------------------------------------------------------------------------------------------------------------|
| Xin Xu                | NIH [grant R35GM140852]                                                                                                                                                                                                                            |
| Xingyou Wang          | NIH NIAID [grant AI125362 to G.D. Cuny, University of Houston]                                                                                                                                                                                     |
| Xu Zhang              | China Scholarship Council (CSC) postdoctoral fellowship No. 201808440648                                                                                                                                                                           |
| Yasser Ali Aldhamen   | Clinical and Translational Science Institute                                                                                                                                                                                                       |
| Yihe Li               | Pathfinder, the University of Western Australia; NHMRC, APP1163933                                                                                                                                                                                 |
| Yogesh K. Gupta       | NIH/NIAID [grant 1R01AI161363] and and Welch Foundation (AQ-2101)                                                                                                                                                                                  |
| Yolanda Pérez-Pertejo | SAF2017-83575-R                                                                                                                                                                                                                                    |
| Yong Li               | Cancer Prevention and Research Institute of Texas [RR190043] and NIH [grants CA219556 and CA229080]                                                                                                                                                |
| Young Tang            | USDA/National Institution for Food and Agriculture (NIFA) [grant 2017-67016-26675], the Program In Innovative Therapeutics for Connecticut's Health (PITCH) Promising Project Award, and the University of Connecticut Research Excellence Program |
| Yuan He               | NIH [grant R01AI148544]                                                                                                                                                                                                                            |
| Yuk-Ching Tse-Dinh    | National Institute Of General Medical Sciences of the National Institutes of Health [grant R35GM139817]                                                                                                                                            |
| Yulia A. Sidorova     | Academy of Finland, GA1325555                                                                                                                                                                                                                      |
| Yun Yen               | TMU Research Center of Cancer Translational Medicine of the Higher Education Sprout Project and the Ministry of Education (MOE) in Taiwan                                                                                                          |



Zhengchen Su      NIH [grant R01AI121012 to B.G.]  
Zhenghe Wang      UH2CA223670; P50CA150964  
Zhiguo Zhang      GM118015  
Zhongle Liu      Fellowship Grant from PRiME Initiative at University of Toronto

---

## Bibliography

1. Calses, P. C., Crawford, J. J., Lill, J. R. & Dey, A. Hippo Pathway in Cancer: Aberrant Regulation and Therapeutic Opportunities. *Trends Cancer* **5**, 297–307 (2019).
2. Moya, I. M. & Halder, G. Hippo–YAP/TAZ signalling in organ regeneration and regenerative medicine. *Nat. Rev. Mol. Cell Biol.* **20**, 211–226 (2019).
3. Moroishi, T. *et al.* The Hippo Pathway Kinases LATS1/2 Suppress Cancer Immunity. *Cell* **167**, 1525-1539.e17 (2016).
4. Kastan, N. *et al.* Small-molecule inhibition of Lats kinases may promote Yap-dependent proliferation in postmitotic mammalian tissues. *Nat. Commun.* **12**, 3100 (2021).
5. Automated comparative protein structure modeling with SWISS-MODEL and Swiss-PdbViewer: A historical perspective - Guex - 2009 - ELECTROPHORESIS - Wiley Online Library.  
<https://analyticalsciencejournals.onlinelibrary.wiley.com/doi/10.1002/elps.200900140>.
6. SWISS-MODEL Repository—new features and functionality | Nucleic Acids Research | Oxford Academic.  
<https://academic.oup.com/nar/article/45/D1/D313/2605750>.
7. van den Boom, J. & Meyer, H. VCP/p97-Mediated Unfolding as a Principle in Protein Homeostasis and Signaling. *Mol. Cell* **69**,

182–194 (2018).

8. Nalbandian, A. *et al.* A progressive translational mouse model of human valosin-containing protein disease: The VCPR155H/+ mouse. *Muscle Nerve* **47**, 260–270 (2013).
9. Yin, H. Z. *et al.* Slow development of ALS-like spinal cord pathology in mutant valosin-containing protein gene knock-in mice. *Cell Death Dis.* **3**, e374–e374 (2012).
10. VCP/p97 is essential for maturation of ubiquitin-containing autophagosomes and this function is impaired by mutations that cause IBMPFD: Autophagy: Vol 6, No 2. <https://www.tandfonline.com/doi/abs/10.4161/auto.6.2.11014>.
11. Critical Role of VCP/p97 in the Pathogenesis and Progression of Non-Small Cell Lung Carcinoma | PLOS ONE. <https://journals.plos.org/plosone/article?id=10.1371/journal.pone.0029073>.
12. Li, C. *et al.* p97/VCP is highly expressed in the stem-like cells of breast cancer and controls cancer stemness partly through the unfolded protein response. *Cell Death Dis.* **12**, 1–16 (2021).
13. Magnaghi, P. *et al.* Covalent and allosteric inhibitors of the ATPase VCP/p97 induce cancer cell death. *Nat. Chem. Biol.* **9**, 548–556 (2013).
14. Nishimura, N. *et al.* Novel p97/VCP inhibitor induces endoplasmic reticulum stress and apoptosis in both bortezomib-sensitive and -resistant multiple myeloma cells. *Cancer Sci.* **110**, 3275–3287 (2019).
15. Chou, T.-F. *et al.* Reversible inhibitor of p97, DBeQ, impairs both ubiquitin-dependent and autophagic protein clearance pathways. *Proc. Natl. Acad. Sci.* **108**, 4834–4839 (2011).
16. Banerjee, S. *et al.* 2.3 Å resolution cryo-EM structure of human p97 and mechanism of allosteric inhibition. *Science* **351**, 871–875

(2016).

17. Anderson, D. J. *et al.* Targeting the AAA ATPase p97 as an Approach to Treat Cancer through Disruption of Protein Homeostasis. *Cancer Cell* **28**, 653–665 (2015).
18. ADP-Glo: A Bioluminescent and Homogeneous ADP Monitoring Assay for Kinases | ASSAY and Drug Development Technologies. <https://www.liebertpub.com/doi/10.1089/adt.2009.0222>.
19. Bickerton, G. R., Paolini, G. V., Besnard, J., Muresan, S. & Hopkins, A. L. Quantifying the chemical beauty of drugs. *Nat. Chem.* **4**, 90–98 (2012).
20. *RDKit: Open-source cheminformatics.*
21. Hsieh, C.-H. *et al.* Miro1 Marks Parkinson's Disease Subset and Miro1 Reducer Rescues Neuron Loss in Parkinson's Models. *Cell Metab.* **30**, 1131-1140.e7 (2019).
22. Huang, C. *et al.* Small molecules block the interaction between porcine reproductive and respiratory syndrome virus and CD163 receptor and the infection of pig cells. *Viro. J.* **17**, 116 (2020).
23. Bon, C. *et al.* Discovery of Novel Trace Amine-Associated Receptor 5 (TAAR5) Antagonists Using a Deep Convolutional Neural Network. *Int. J. Mol. Sci.* **23**, 3127 (2022).
24. Pedicone, C. *et al.* Discovery of a novel SHIP1 agonist that promotes degradation of lipid-laden phagocytic cargo by microglia. *iScience* **25**, 104170 (2022).
25. Su, S. *et al.* SPOP and OTUD7A Control EWS–FLI1 Protein Stability to Govern Ewing Sarcoma Growth. *Adv. Sci.* **8**, 2004846 (2021).

26. Stecula, A., Hussain, M. S. & Viola, R. E. Discovery of Novel Inhibitors of a Critical Brain Enzyme Using a Homology Model and a Deep Convolutional Neural Network. *J. Med. Chem.* **63**, 8867–8875 (2020).
